# Supplementary material for: Bioaccessibility and bioavailability of bioactive compounds from yellow mustard flour and milk whey fermented with lactic acid bacteria
Source: Royal Society of Chemistry journal article supplement (doi:10.1039/d1fo02059e), 2021-01-01
Supplement: d1fo02059e1.xlsx [file d1fo02059e1.xlsx]

## Sheet: Tables
Total Polyphenols (mg/L)
		1h							2h							3h							4h
	Conc (%)	Apical				Basal			Apical				Basal			Apical				Basal			Apical				Basal
Control Flour	0.8	70.8683	±	1.74248		5.33171	±	1.27709	57.6552	±	10.4161		7.41886	±	0.931337	54.369	±	5.43776		8.6049	±	1.63008	49.7034	±	0.788287		17.3528	±	3.06582
	0.6	54.118	±	0.341968		3.75539	±	0.385855	46.2928	±	1.68773		4.18411	±	0.769462	43.8485	±	3.69453		6.42248	±	0.258668	45.2276	±	2.39021		12.9691	±	0.300256
	0.4	41.8038	±	1.35075		2.66307	±	0.114763	35.8032	±	1.62891		2.60308	±	0.42721	32.5694	±	2.96928		4.57646	±	0.300032	30.678	±	4.53973		8.3181	±	1.71636
	0.2	23.2045	±	0.501873		1.52521	±	0.0268349	21.0337	±	1.75822		1.81858	±	0.391411	17.8614	±	0.904826		2.37883	±	0.484472	17.0227	±	0.602232		5.91806	±	1.92751
Fermented Flour	0.8	60.204	±	0.528944		4.23017	±	0.310555	49.6829	±	4.01804		2.23566	±	0.799228	47.7546	±	1.46811		5.46049	±	0.400515	51.9206	±	6.69782		11.8366	±	0.979029
	0.6	43.0434	±	0.148704		2.77736	±	0.0773216	39.3647	±	0.975532		2.20127	±	0.816208	35.3286	±	1.28867		3.71178	±	0.168422	34.3718	±	7.8029		12.2327	±	1.74916
	0.4	34.1681	±	1.33704		1.87156	±	0.24165	23.4227	±	0.763911		1.74956	±	0.437088	26.3671	±	0.892089		3.49454	±	0.535299	26.8494	±	1.17891		8.0747	±	0.757064
	0.2	20.1432	±	1.05694		0.99695	±	0.117615	15.7555	±	0.529819		0.120943	±	0.128381	14.3152	±	0.792626		1.20526	±	0.112941	15.3861	±	3.57597		4.03381	±	2.67113
Control Whey	0.8	20.41	±	2.24733		nd	±	nd	12.8935	±	0.182618		nd	±	nd	16.4473	±	0.205504		1.17448	±	0.880509	16.5675	±	1.40787		3.49023	±	0.0934472
	0.6	16.1084	±	1.33318		nd	±	nd	10.2333	±	0.266908		nd	±	nd	14.4426	±	0.35656		0.800797	±	0.692704	13.8926	±	0.432539		3.79615	±	0.747183
	0.4	12.3818	±	0.822307		nd	±	nd	6.27162	±	0.527871		nd	±	nd	12.7236	±	1.97678		0.607194	±	0.447756	11.1386	±	0.320311		3.36006	±	0.167349
	0.2	8.21328	±	0.361534		nd	±	nd	3.10225	±	0.312652		nd	±	nd	8.78072	±	0.0559243		0	±	0	9.63389	±	1.34041		3.39844	±	0.631218
Fermented Whey	0.8	15.8741	±	0.229974		nd	±	nd	11.3266	±	0.6904		nd	±	nd	15.4174	±	1.69888		nd	±	nd	15.7823	±	1.79306		4.02165	±	0.125435
	0.6	13.4742	±	0.185212		nd	±	nd	9.88824	±	1.34975		nd	±	nd	14.9736	±	1.12276		nd	±	nd	13.8119	±	0.88378		4.02416	±	1.39925
	0.4	10.551	±	0.425379		nd	±	nd	6.4968	±	0.377394		nd	±	nd	11.5481	±	0.349902		nd	±	nd	12.3933	±	0.478839		3.23998	±	0.24827
	0.2	7.22134	±	0.211708		nd	±	nd	2.98539	±	0.143013		nd	±	nd	9.1661	±	0.93103		nd	±	nd	9.84628	±	1.54197		3.72724	±	0.80746
DL-3-Phenyllactic Acid -PLA (µg/L)
		1h							2h							3h							4h
	Conc (%)	Apical				Basal			Apical				Basal			Apical				Basal			Apical				Basal
Control Flour	0.8	nd	±	nd		nd	±	nd	nd	±	nd		nd	±	nd	nd	±	nd		nd	±	nd	nd	±	nd		nd	±	nd
	0.6	nd	±	nd		nd	±	nd	nd	±	nd		nd	±	nd	nd	±	nd		nd	±	nd	nd	±	nd		nd	±	nd
	0.4	nd	±	nd		nd	±	nd	nd	±	nd		nd	±	nd	nd	±	nd		nd	±	nd	nd	±	nd		nd	±	nd
	0.2	nd	±	nd		nd	±	nd	nd	±	nd		nd	±	nd	nd	±	nd		nd	±	nd	nd	±	nd		nd	±	nd
Fermented Flour	0.8	56.456	±	0.70565		0	±	0	58.2883	±	10.778		0	±	0.029774	45.9521	±	6.91055		0	±	0	54.3636	±	6.52759		1.18775	±	0.898518
	0.6	39.8683	±	7.42924		0.937709	±	0.83632	42.3742	±	10.3484		2.35737	±	0.468493	36.9251	±	4.72188		2.86264	±	0.192991	41.2352	±	3.93132		6.2066	±	0.0231087
	0.4	34.7909	±	11.2404		0.369677	±	0.13979	36.8664	±	7.38413		0.507823	±	0.161606	60.5955	±	5.00005		2.33324	±	0.713838	49.8147	±	6.42129		2.45549	±	0.6905
	0.2	33.654	±	10.0114		0.755566	±	0.515513	23.3079	±	1.43069		1.2494	±	0.456658	28.0685	±	3.70226		1.65526	±	0.454661	30.0952	±	7.96535		5.12689	±	2.791
Control Whey	0.8	nd	±	nd		nd	±	nd	nd	±	nd		nd	±	nd	nd	±	nd		nd	±	nd	nd	±	nd		nd	±	nd
	0.6	nd	±	nd		nd	±	nd	nd	±	nd		nd	±	nd	nd	±	nd		nd	±	nd	nd	±	nd		nd	±	nd
	0.4	nd	±	nd		nd	±	nd	nd	±	nd		nd	±	nd	nd	±	nd		nd	±	nd	nd	±	nd		nd	±	nd
	0.2	nd	±	nd		nd	±	nd	nd	±	nd		nd	±	nd	nd	±	nd		nd	±	nd	nd	±	nd		nd	±	nd
Fermented Whey	0.8	26.348	±	4.33859		0.0203507	±	0.0287802	25.5359	±	1.91541		0	±	0	38.5199	±	9.72435		1.48076	±	2.52483	35.4743	±	1.86237		2.84361	±	2.58152
	0.6	25.6048	±	0.864751		1.09923	±	0.297044	30.6064	±	3.55379		0	±	0	32.5469	±	3.14974		0.98133	±	1.26198	38.048	±	4.9314		0.497453	±	0.361614
	0.4	20.6188	±	1.69286		1.29876	±	0.212808	25.2348	±	2.24537		0.179666	±	0.11119	27.4288	±	2.93108		0.334228	±	0.243113	33.8845	±	4.59025		0.809508	±	1.40211
	0.2	16.1469	±	4.84671		0.155584	±	0.162986	12.7795	±	0.17752		0.395825	±	0.0699899	10.556	±	2.63862		1.68201	±	0.619244	18.7495	±	2.66331		3.57923	±	0.71466
Lactic Acid (µg/L)
		1h							2h							3h							4h
	Conc (%)	Apical				Basal			Apical				Basal			Apical				Basal			Apical				Basal
Control Flour	0.8	nd	±	nd		nd	±	nd	nd	±	nd		nd	±	nd	nd	±	nd		nd	±	nd	nd	±	nd		nd	±	nd
	0.6	nd	±	nd		nd	±	nd	nd	±	nd		nd	±	nd	nd	±	nd		nd	±	nd	nd	±	nd		nd	±	nd
	0.4	nd	±	nd		nd	±	nd	nd	±	nd		nd	±	nd	nd	±	nd		nd	±	nd	nd	±	nd		nd	±	nd
	0.2	nd	±	nd		nd	±	nd	nd	±	nd		nd	±	nd	nd	±	nd		nd	±	nd	nd	±	nd		nd	±	nd
Fermented Flour	0.8	259.581	±	140.258		67.2763	±	28.3573	320.512	±	8.01625		252.643	±	297.034	198.594	±	121.429		145.154	±	42.8308	386.773	±	7.97814		226.148	±	80.2136
	0.6	93.6232	±	39.5534		84.3403	±	5.75149	212.893	±	34.0605		99.74	±	6.46893	194.873	±	56.8644		163.196	±	32.2875	99.5978	±	130.667		250.666	±	69.0959
	0.4	89.8001	±	44.1091		64.7703	±	11.4288	59.1188	±	40.5461		67.5949	±	16.6378	126.265	±	19.1973		121.918	±	20.3041	64.504	±	2.60175		93.4044	±	141.464
	0.2	268.793	±	376.549		60.8193	±	48.2229	55.1272	±	8.316		111.941	±	42.6708	97.1686	±	57.3097		113.116	±	21.5761	413.813	±	188.051		121.012	±	53.0414
Control Whey	0.8	13.3213	±	23.0732		0	±	0	66.847	±	115.782		13.5938	±	14.8159	0	±	0		35.8795	±	17.5435	0	±	0		19.6463	±	17.5113
	0.6	0	±	0		0	±	0	0	±	0		12.8192	±	22.2034	0	±	0		27.3967	±	15.5935	0	±	0		31.4024	±	17.6706
	0.4	0	±	0		0	±	0	0	±	0		23.7943	±	20.6617	23.4775	±	26.0883		44.3454	±	32.5706	0	±	0		41.9358	±	21.2766
	0.2	0	±	0		0	±	0	0	±	0		15.3962	±	26.667	0	±	0		24.9048	±	25.919	0	±	0		26.7154	±	3.30649
Fermented Whey	0.8	420.374	±	51.3516		0	±	0	427.656	±	143.556		29.3776	±	50.8835	539.204	±	287.794		62.3088	±	88.118	442.032	±	119.449		91.6238	±	31.9768
	0.6	372.073	±	100.769		0	±	0	280.134	±	53.8654		0	±	0	272.438	±	64.6763		0	±	0	276.485	±	60.8735		33.4989	±	19.8107
	0.4	196.561	±	61.3122		0	±	0	148.508	±	126.062		0	±	0	117.923	±	52.151		22.4246	±	38.8405	204.504	±	64.0198		84.8276	±	61.6254
	0.2	25.221	±	58.0295		0	±	0	26.4363	±	40.5494		10.8376	±	18.7714	10.7495	±	23.8039		0	±	0	149.287	±	136.719		129.199	±	171.617

## Sheet: POLxExtract
			ANOVA	PostHoc	diff	lwr	upr	p adj
Basal	Dosis 1	Tiempo 1h	<0,001	HF-HC	-1.101541e+00	-2.819801	0.6167183	0.2464741
				SC-HC	-5.331709e+00	-7.049968	-3.6134493	0.0000415
				SF-HC	-5.331709e+00	-7.049968	-3.6134493	0.0000415
				SC-HF	-4.230168e+00	-5.948427	-2.5119080	0.0002233
				SF-HF	-4.230168e+00	-5.948427	-2.5119080	0.0002233
				SF-SC	-8.881784e-16	-1.718260	1.7182595	1.0000000
Basal	Dosis 1	Tiempo 2h	<0,001	HF-HC	-5.18320049	-6.807563	-3.5588377	0.0000337
				SC-HC	-7.33504911	-8.959412	-5.7106863	0.0000025
				SF-HC	-7.32199543	-8.946358	-5.6976326	0.0000025
				SC-HF	-2.15184861	-3.776211	-0.5274858	0.0120745
				SF-HF	-2.13879493	-3.763158	-0.5144321	0.0124900
				SF-SC	0.01305368	-1.611309	1.6374165	0.9999933
Basal	Dosis 1	Tiempo 3h	<0,001	HF-HC	-3.1444063	-5.919683	-0.3691292	0.0285635
				SC-HC	-7.4304133	-10.205690	-4.6551362	0.0002083
				SF-HC	-8.2926201	-11.395474	-5.1897659	0.0002107
				SC-HF	-4.2860070	-7.061284	-1.5107298	0.0058192
				SF-HF	-5.1482137	-8.251068	-2.0453595	0.0038876
				SF-SC	-0.8622068	-3.965061	2.2406474	0.7957108
Basal	Dosis 1	Tiempo 4h	<0,001	HF-HC	-5.5161968	-10.169379	-0.8630145	0.0230294
				SC-HC	-13.8625689	-18.515751	-9.2093866	0.0001042
				SF-HC	-13.3311414	-18.533557	-8.1287254	0.0002760
				SC-HF	-8.3463722	-12.999554	-3.6931899	0.0024769
				SF-HF	-7.8149446	-13.017361	-2.6125286	0.0067784
				SF-SC	0.5314275	-4.670988	5.7338435	0.9855832
Basal	Dosis 2	Tiempo 1h	<0,001	HF-HC	-9.780351e-01	-1.4925128	-0.4635574	0.0013215
				SC-HC	-3.755392e+00	-4.2698694	-3.2409140	0.0000000
				SF-HC	-3.755392e+00	-4.2698694	-3.2409140	0.0000000
				SC-HF	-2.777357e+00	-3.2918343	-2.2628789	0.0000006
				SF-HF	-2.777357e+00	-3.2918343	-2.2628789	0.0000006
				SF-SC	-1.998401e-15	-0.5144777	0.5144777	1.0000000
Basal	Dosis 2	Tiempo 2h	<0,001	HF-HC	-1.98284441	-3.450109	-0.5155797	0.0107989
				SC-HC	-4.16309127	-5.630356	-2.6958265	0.0000802
				SF-HC	-4.18410952	-5.651374	-2.7168448	0.0000773
				SC-HF	-2.18024686	-3.647512	-0.7129821	0.0062308
				SF-HF	-2.20126511	-3.668530	-0.7340004	0.0058845
				SF-SC	-0.02101825	-1.488283	1.4462465	0.9999622
Basal	Dosis 2	Tiempo 3h	<0,001	HF-HC	-2.7106964	-3.702145	-1.7192474	0.0001050
				SC-HC	-5.6216811	-6.613130	-4.6302320	0.0000004
				SF-HC	-6.4224779	-7.413927	-5.4310288	0.0000001
				SC-HF	-2.9109847	-3.902434	-1.9195356	0.0000624
				SF-HF	-3.7117815	-4.703231	-2.7203324	0.0000101
				SF-SC	-0.8007968	-1.792246	0.1906523	0.1191199
Basal	Dosis 2	Tiempo 4h	<0,001	HF-HC	-0.7363852	-3.848298	2.375528	0.8709741
				SC-HC	-9.1729552	-12.284868	-6.061042	0.0000606
				SF-HC	-8.9449458	-12.056859	-5.833033	0.0000729
				SC-HF	-8.4365699	-11.548483	-5.324657	0.0001117
				SF-HF	-8.2085606	-11.320474	-5.096647	0.0001362
				SF-SC	0.2280094	-2.883904	3.339923	0.9950813
Basal	Dosis 3	Tiempo 1h	<0,001	HF-HC	-7.915163e-01	-1.1412554	-0.4417772	0.0004039
				SC-HC	-2.663072e+00	-3.0128107	-2.3133325	0.0000000
				SF-HC	-2.663072e+00	-3.0128107	-2.3133325	0.0000000
				SC-HF	-1.871555e+00	-2.2212944	-1.5218162	0.0000006
				SF-HF	-1.871555e+00	-2.2212944	-1.5218162	0.0000006
				SF-SC	-4.440892e-16	-0.3497391	0.3497391	1.0000000
Basal	Dosis 3	Tiempo 2h	<0,001	HF-HC	-0.85352466	-1.7238329	0.01678358	0.0543048
				SC-HC	-2.52700045	-3.3973087	-1.65669221	0.0001232
				SF-HC	-2.60308043	-3.4733887	-1.73277219	0.0001015
				SC-HF	-1.67347579	-2.4519031	-0.89504843	0.0008324
				SF-HF	-1.74955577	-2.5279831	-0.97112841	0.0006319
				SF-SC	-0.07607998	-0.8545073	0.70234737	0.9873089
Basal	Dosis 3	Tiempo 3h	<0,001	HF-HC	-1.0819194	-2.168058	0.004219056	0.0508830
				SC-HC	-3.9692704	-5.055409	-2.883131922	0.0000122
				SF-HC	-4.3822456	-5.468384	-3.296107118	0.0000058
				SC-HF	-2.8873510	-3.973489	-1.801212495	0.0001288
				SF-HF	-3.3003262	-4.386465	-2.214187691	0.0000484
				SF-SC	-0.4129752	-1.499114	0.673163287	0.6337634
Basal	Dosis 3	Tiempo 4h	<0,001	HF-HC	-0.2433971	-2.976035	2.489241	0.9903044
				SC-HC	-4.9580389	-7.690677	-2.225401	0.0023156
				SF-HC	-5.0781201	-8.133302	-2.022938	0.0038485
				SC-HF	-4.7146418	-7.447280	-1.982004	0.0031060
				SF-HF	-4.8347230	-7.889905	-1.779541	0.0050802
				SF-SC	-0.1200812	-3.175263	2.935101	0.9991355
Basal	Dosis 4	Tiempo 1h	<0,001	HF-HC	-5.282644e-01	-0.6859804	-0.3705485	2.34e-05
				SC-HC	-1.525215e+00	-1.6829307	-1.3674987	0.00e+00
				SF-HC	-1.525215e+00	-1.6829307	-1.3674987	0.00e+00
				SC-HF	-9.969503e-01	-1.1546662	-0.8392343	1.00e-07
				SF-HF	-9.969503e-01	-1.1546662	-0.8392343	1.00e-07
				SF-SC	-1.110223e-16	-0.1577160	0.1577160	1.00e+00
Basal	Dosis 4	Tiempo 2h	<0,001	HF-HC	-1.69763272	-2.3480771	-1.0471884	0.0002454
				SC-HC	-1.81779359	-2.3995687	-1.2360185	0.0000762
				SF-HC	-1.80303124	-2.3848063	-1.2212561	0.0000804
				SC-HF	-0.12016087	-0.7706052	0.5302835	0.9252137
				SF-HF	-0.10539852	-0.7558429	0.5450458	0.9473272
				SF-SC	0.01476235	-0.5670128	0.5965375	0.9997661
Basal	Dosis 4	Tiempo 3h	<0,001	HF-HC	-1.1735695	-2.191918	-0.1552214	0.0253478
				SC-HC	-1.7715146	-2.789863	-0.7531666	0.0023537
				SF-HC	-2.3788264	-3.397174	-1.3604783	0.0003237
				SC-HF	-0.5979452	-1.616293	0.4204029	0.3075289
				SF-HF	-1.2052570	-2.223605	-0.1869089	0.0221183
				SF-SC	-0.6073118	-1.625660	0.4110363	0.2963380
Basal	Dosis 4	Tiempo 4h	0.344	HF-HC	-1.8842476	-6.394279	2.625784	0.5667619
				SC-HC	-2.5196157	-7.029647	1.990416	0.3442539
				SF-HC	-2.1908181	-6.700849	2.319213	0.4518168
				SC-HF	-0.6353681	-5.145399	3.874663	0.9675434
				SF-HF	-0.3065705	-4.816602	4.203461	0.9960570
				SF-SC	0.3287975	-4.181234	4.838829	0.9951533
Apical	Dosis 1	Tiempo 1h	<0,001	HF-HC	-10.664289	-14.457736	-6.8708422	0.0000858
				SC-HC	-50.458269	-54.251716	-46.6648220	0.0000000
				SF-HC	-54.994144	-58.787591	-51.2006974	0.0000000
				SC-HF	-39.793980	-43.587427	-36.0005330	0.0000000
				SF-HF	-44.329855	-48.123302	-40.5364084	0.0000000
				SF-SC	-4.535875	-8.329322	-0.7424285	0.0209755
Apical	Dosis 1	Tiempo 2h	<0,001	HF-HC	-7.972352	-22.59780	6.653091	0.3628172
				SC-HC	-44.761724	-59.38717	-30.136281	0.0000459
				SF-HC	-46.328623	-60.95407	-31.703180	0.0000356
				SC-HF	-36.789372	-51.41482	-22.163929	0.0001915
				SF-HF	-38.356271	-52.98171	-23.730828	0.0001420
				SF-SC	-1.566899	-16.19234	13.058544	0.9851027
Apical	Dosis 1	Tiempo 3h	<0,001	HF-HC	-6.614453	-14.310433	1.081526	0.0943661
				SC-HC	-37.921703	-45.617682	-30.225724	0.0000013
				SF-HC	-38.951629	-46.647608	-31.255650	0.0000010
				SC-HF	-31.307250	-39.003229	-23.611270	0.0000054
				SF-HF	-32.337176	-40.033155	-24.641196	0.0000042
				SF-SC	-1.029926	-8.725905	6.666053	0.9719034
Apical	Dosis 1	Tiempo 4h	<0,001	HF-HC	2.217172	-9.245995	13.680339	0.9156629
				SC-HC	-33.135875	-44.599042	-21.672708	0.0001268
				SF-HC	-33.921051	-45.384218	-22.457884	0.0001088
				SC-HF	-35.353047	-45.606015	-25.100079	0.0000398
				SF-HF	-36.138223	-46.391191	-25.885255	0.0000344
				SF-SC	-0.785176	-11.038144	9.467792	0.9937640
Apical	Dosis 2	Tiempo 1h	<0,001	HF-HC	-11.074627	-12.900592	-9.2486626	0.0000002
				SC-HC	-38.009531	-39.835496	-36.1835661	0.0000000
				SF-HC	-40.643805	-42.469769	-38.8178398	0.0000000
				SC-HF	-26.934904	-28.760868	-25.1089388	0.0000000
				SF-HF	-29.569177	-31.395142	-27.7432124	0.0000000
				SF-SC	-2.634274	-4.460238	-0.8083089	0.0074171
Apical	Dosis 2	Tiempo 2h	<0,001	HF-HC	-6.9281818	-10.04757	-3.808792	0.0004603
				SC-HC	-36.0595512	-39.17894	-32.940161	0.0000000
				SF-HC	-36.4046019	-39.52399	-33.285212	0.0000000
				SC-HF	-29.1313694	-32.25076	-26.011980	0.0000000
				SF-HF	-29.4764201	-32.59581	-26.357030	0.0000000
				SF-SC	-0.3450507	-3.46444	2.774339	0.9836673
Apical	Dosis 2	Tiempo 3h	<0,001	HF-HC	-8.5198608	-13.86212	-3.177598	0.0040613
				SC-HC	-29.4058580	-34.74812	-24.063595	0.0000005
				SF-HC	-28.8748751	-34.21714	-23.532612	0.0000006
				SC-HF	-20.8859972	-26.22826	-15.543734	0.0000073
				SF-HF	-20.3550144	-25.69728	-15.012751	0.0000089
				SF-SC	0.5309828	-4.81128	5.873246	0.9880061
Apical	Dosis 2	Tiempo 4h	<0,001	HF-HC	-10.85584125	-21.60215	-0.1095323	0.0477568
				SC-HC	-31.33496741	-42.08128	-20.5886584	0.0000656
				SF-HC	-31.41573464	-42.16204	-20.6694256	0.0000644
				SC-HF	-20.47912616	-31.22544	-9.7328172	0.0013003
				SF-HF	-20.55989338	-31.30620	-9.8135844	0.0012668
				SF-SC	-0.08076723	-10.82708	10.6655418	0.9999945
Apical	Dosis 3	Tiempo 1h	<0,001	HF-HC	-7.635729	-10.399586	-4.8718709	0.0000974
				SC-HC	-29.421949	-32.185807	-26.6580915	0.0000000
				SF-HC	-31.252763	-34.016621	-28.4889053	0.0000000
				SC-HF	-21.786221	-24.550078	-19.0223629	0.0000000
				SF-HF	-23.617034	-26.380892	-20.8531768	0.0000000
				SF-SC	-1.830814	-4.594671	0.9330438	0.2252603
Apical	Dosis 3	Tiempo 2h	<0,001	HF-HC	-12.3804949	-14.880927	-9.880063	0.0000012
				SC-HC	-29.5315813	-32.032013	-27.031150	0.0000000
				SF-HC	-29.3064015	-31.806833	-26.805970	0.0000000
				SC-HF	-17.1510864	-19.651518	-14.650655	0.0000001
				SF-HF	-16.9259066	-19.426338	-14.425475	0.0000001
				SF-SC	0.2251798	-2.275252	2.725611	0.9909963
Apical	Dosis 3	Tiempo 3h	<0,001	HF-HC	-6.202238	-11.03106	-1.373420	0.0143190
				SC-HC	-19.845758	-24.67458	-15.016939	0.0000050
				SF-HC	-21.021310	-25.85013	-16.192491	0.0000033
				SC-HF	-13.643520	-18.47234	-8.814701	0.0000827
				SF-HF	-14.819071	-19.64789	-9.990253	0.0000450
				SF-SC	-1.175552	-6.00437	3.653267	0.8616340
Apical	Dosis 3	Tiempo 4h	<0,001	HF-HC	-3.828596	-10.006567	2.349375	0.2693692
				SC-HC	-19.539478	-25.717449	-13.361507	0.0000360
				SF-HC	-18.284725	-24.462696	-12.106754	0.0000588
				SC-HF	-15.710882	-21.888853	-9.532911	0.0001772
				SF-HF	-14.456129	-20.634100	-8.278158	0.0003198
				SF-SC	1.254753	-4.923218	7.432724	0.9125020
Apical	Dosis 4	Tiempo 1h	<0,001	HF-HC	-3.0613364	-4.985107	-1.1375661	0.0049238
				SC-HC	-14.9912416	-16.915012	-13.0674713	0.0000002
				SF-HC	-15.9831818	-17.906952	-14.0594115	0.0000001
				SC-HF	-11.9299052	-13.650578	-10.2092327	0.0000003
				SF-HF	-12.9218454	-14.642518	-11.2011729	0.0000002
				SF-SC	-0.9919402	-2.712613	0.7287323	0.3056006
Apical	Dosis 4	Tiempo 2h	<0,001	HF-HC	-5.2782538	-7.720685	-2.835822	0.0005561
				SC-HC	-17.9314879	-20.373919	-15.489056	0.0000000
				SF-HC	-18.0483524	-20.490784	-15.605921	0.0000000
				SC-HF	-12.6532340	-15.095666	-10.210803	0.0000008
				SF-HF	-12.7700986	-15.212530	-10.327667	0.0000008
				SF-SC	-0.1168645	-2.559296	2.325567	0.9986079
Apical	Dosis 4	Tiempo 3h	<0,001	HF-HC	-3.5462231	-5.536200	-1.556246	0.0020160
				SC-HC	-9.0806869	-11.070664	-7.090710	0.0000023
				SF-HC	-8.6953083	-10.685285	-6.705331	0.0000032
				SC-HF	-5.5344638	-7.524441	-3.544487	0.0000928
				SF-HF	-5.1490852	-7.139062	-3.159108	0.0001564
				SF-SC	0.3853786	-1.604599	2.375356	0.9227569
Apical	Dosis 4	Tiempo 4h	0.004	HF-HC	-1.6366214	-7.078203	3.80496067	0.7732469
				SC-HC	-7.3888553	-12.830437	-1.94727324	0.0105119
				SF-HC	-7.1764614	-12.618043	-1.73487934	0.0123789
				SC-HF	-5.7522339	-11.193816	-0.31065186	0.0386929
				SF-HF	-5.5398400	-10.981422	-0.09825796	0.0460967
				SF-SC	0.2123939	-5.229188	5.65397596	0.9992413

## Sheet: POLxDose
			ANOVA	PostHoc	diff	lwr	upr	p adj
Basal	HC	Tiempo 1h	<0,001	2-1	-1.576317	-3.327256	0.1746216	0.0784731
				3-1	-2.668637	-4.419576	-0.9176985	0.0053528
				4-1	-3.806494	-5.557433	-2.0555554	0.0005338
				3-2	-1.092320	-2.843259	0.6586186	0.2648106
				4-2	-2.230177	-3.981116	-0.4792383	0.0149879
				4-3	-1.137857	-2.888796	0.6130818	0.2375509
Basal	HC	Tiempo 2h	<0,001	2-1	-3.2347460	-5.120538	-1.3489543	0.0032119
				3-1	-4.8157751	-6.924154	-2.7073958	0.0005713
				4-1	-5.6002797	-7.486072	-3.7144879	0.0001063
				3-2	-1.5810291	-3.689408	0.5273502	0.1477004
				4-2	-2.3655337	-4.251325	-0.4797419	0.0174456
				4-3	-0.7845046	-2.892884	1.3238748	0.6283627
Basal	HC	Tiempo 3h	<0,001	2-1	-2.182419	-4.465173	0.10033530	0.0609727
				3-1	-4.028432	-6.311187	-1.74567818	0.0021469
				4-1	-6.226070	-8.508825	-3.94331616	0.0001069
				3-2	-1.846013	-4.128768	0.43674072	0.1186006
				4-2	-4.043651	-6.326406	-1.76089727	0.0020954
				4-3	-2.197638	-4.480392	0.08511621	0.0591628
Basal	HC	Tiempo 4h	<0,001	2-1	-4.383689	-9.637665	0.8702857	0.1056774
				3-1	-9.034696	-14.288671	-3.7807204	0.0025339
				4-1	-11.434737	-16.688712	-6.1807620	0.0005297
				3-2	-4.651006	-9.904981	0.6029691	0.0839950
				4-2	-7.051048	-12.305023	-1.7970726	0.0112290
				4-3	-2.400042	-7.654017	2.8539335	0.4993981
Basal	HF	Tiempo 1h	<0,001	2-1	-1.4528110	-1.999170	-0.9064516	0.0001285
				3-1	-2.3586122	-2.904972	-1.8122528	0.0000035
				4-1	-3.2332173	-3.779577	-2.6868579	0.0000003
				3-2	-0.9058013	-1.452161	-0.3594419	0.0031917
				4-2	-1.7804063	-2.326766	-1.2340469	0.0000288
				4-3	-0.8746051	-1.420964	-0.3282457	0.0039687
Basal	HF	Tiempo 2h	0.347	2-1	-0.03438997	-1.806249	1.73746934	0.9998952
				3-1	-0.48609931	-2.257959	1.28575999	0.8015294
				4-1	-2.11471193	-4.095711	-0.13371301	0.0375468
				3-2	-0.45170934	-2.223569	1.32014996	0.8324751
				4-2	-2.08032196	-4.061321	-0.09932304	0.0404002
				4-3	-1.62861262	-3.609612	0.35238630	0.1079552
Basal	HF	Tiempo 3h	<0,001	2-1	-1.7487090	-2.662062	-0.8353556	0.0012607
				3-1	-1.9659454	-2.879299	-1.0525921	0.0005716
				4-1	-4.2552335	-5.168587	-3.3418801	0.0000019
				3-2	-0.2172365	-1.130590	0.6961169	0.8693347
				4-2	-2.5065245	-3.419878	-1.5931712	0.0001022
				4-3	-2.2892880	-3.202641	-1.3759347	0.0001965
Basal	HF	Tiempo 4h	0.001	2-1	0.3961221	-4.080713	4.8729576	0.9914477
				3-1	-3.7618959	-8.238731	0.7149396	0.1028854
				4-1	-7.8027880	-12.279623	-3.3259525	0.0023251
				3-2	-4.1580180	-8.634853	0.3188175	0.0689739
				4-2	-8.1989101	-12.675746	-3.7220746	0.0016884
				4-3	-4.0408921	-8.517728	0.4359433	0.0776422
Basal	SC	Tiempo 1h	NA (todo 0)
Basal	SC	Tiempo 2h	0.417	2-1	-0.062788216	-0.2421346	0.11655814	0.6877269
				3-1	-0.007726484	-0.1870728	0.17161987	0.9989815
				4-1	-0.083024189	-0.2623705	0.09632217	0.4891443
				3-2	0.055061732	-0.1242846	0.23440809	0.7627582
				4-2	-0.020235973	-0.1995823	0.15911038	0.9827095
				4-3	-0.075297705	-0.2546441	0.10404865	0.5631417
Basal	SC	Tiempo 3h	0.71	2-1	-0.3736866942	-2.134930	1.387557	0.9020364
				3-1	-0.5672894748	-2.328533	1.193954	0.7369642
				4-1	-0.5671716991	-2.328415	1.194072	0.7370799
				3-2	-0.1936027807	-1.954846	1.567641	0.9839588
				4-2	-0.1934850049	-1.954728	1.567758	0.9839869
				4-3	0.0001177757	-1.761126	1.761361	1.0000000
Basal	SC	Tiempo 4h	0.71	2-1	0.30592431	-0.9971458	1.6089944	0.8734776
				3-1	-0.13016553	-1.4332357	1.1729046	0.9878309
				4-1	-0.09178389	-1.3948540	1.2112862	0.9956208
				3-2	-0.43608984	-1.7391600	0.8669803	0.7150393
				4-2	-0.39770820	-1.7007783	0.9053619	0.7657996
				4-3	0.03838164	-1.2646885	1.3414518	0.9996728
Basal	SF	Tiempo 1h	NA (todo 0)
Basal	SF	Tiempo 2h	0.484	2-1	-9.686014e-02	-0.3189973	0.1252770	0.5348660
				3-1	-9.686014e-02	-0.3189973	0.1252770	0.5348660
				4-1	-8.131552e-02	-0.3034526	0.1408216	0.6591846
				3-2	1.156482e-17	-0.2221371	0.2221371	1.0000000
				4-2	1.554463e-02	-0.2065925	0.2376817	0.9957044
				4-3	1.554463e-02	-0.2065925	0.2376817	0.9957044
Basal	SF	Tiempo 3h	0.458	2-1	-3.122767e-01	-1.0536480	0.4290946	0.5400820
				3-1	-1.180579e-01	-0.8594292	0.6233134	0.9497619
				4-1	-3.122767e-01	-1.0536480	0.4290946	0.5400820
				3-2	1.942188e-01	-0.4688838	0.8573214	0.7704067
				4-2	-4.625929e-18	-0.6631026	0.6631026	1.0000000
				4-3	-1.942188e-01	-0.8573214	0.4688838	0.7704067
Basal	SF	Tiempo 4h	0.801	2-1	0.002506143	-2.966743	2.971756	1.0000000
				3-1	-0.781674224	-4.034324	2.470976	0.8379357
				4-1	-0.294413906	-3.263663	2.674836	0.9847694
				3-2	-0.784180366	-3.753430	2.185069	0.7988010
				4-2	-0.296920049	-2.952697	2.358857	0.9785419
				4-3	0.487260318	-2.481989	3.456510	0.9380693
Apical	HC	Tiempo 1h	<0,001	2-1	-16.75028	-20.01397	-13.486578	2.60e-06
				3-1	-29.06446	-32.32816	-25.800763	1.00e-07
				4-1	-47.66373	-51.31266	-44.014807	0.00e+00
				3-2	-12.31419	-15.57788	-9.050488	2.19e-05
				4-2	-30.91346	-34.56238	-27.264531	1.00e-07
				4-3	-18.59927	-22.24819	-14.950346	2.70e-06
Apical	HC	Tiempo 2h	<0,001	2-1	-11.36239	-25.50894	2.7841667	0.1215527
				3-1	-21.85203	-35.99858	-7.7054722	0.0049362
				4-1	-36.62149	-50.76805	-22.4749368	0.0001559
				3-2	-10.48964	-24.63619	3.6569161	0.1599068
				4-2	-25.25910	-39.40566	-11.1125485	0.0019907
				4-3	-14.76946	-28.91602	-0.6229096	0.0410224
Apical	HC	Tiempo 3h	<0,001	2-1	-10.52059	-20.02517	-1.016012	0.0309924
				3-1	-21.79968	-31.30425	-12.295099	0.0003680
				4-1	-36.50764	-46.01222	-27.003064	0.0000084
				3-2	-11.27909	-20.78366	-1.774509	0.0218155
				4-2	-25.98705	-35.49163	-16.482474	0.0001050
				4-3	-14.70797	-24.21254	-5.203388	0.0048828
Apical	HC	Tiempo 4h	<0,001	2-1	-4.475783	-12.86789	3.916324	0.3619442
				3-1	-19.025365	-27.41747	-10.633258	0.0005987
				4-1	-32.680652	-41.07276	-24.288544	0.0000177
				3-2	-14.549582	-22.05571	-7.043453	0.0015633
				4-2	-28.204868	-35.71100	-20.698739	0.0000225
				4-3	-13.655287	-21.16142	-6.149158	0.0022796
Apical	HF	Tiempo 1h	<0,001	2-1	-17.160614	-19.50173	-14.81950	0.0e+00
				3-1	-26.035900	-28.37702	-23.69478	0.0e+00
				4-1	-40.060778	-42.40189	-37.71966	0.0e+00
				3-2	-8.875287	-11.21640	-6.53417	9.2e-06
				4-2	-22.900165	-25.24128	-20.55905	0.0e+00
				4-3	-14.024878	-16.36599	-11.68376	2.0e-07
Apical	HF	Tiempo 2h	<0,001	2-1	-10.318218	-15.85878	-4.777658	0.0015133
				3-1	-26.260170	-31.80073	-20.719610	0.0000017
				4-1	-33.927394	-39.46795	-28.386833	0.0000002
				3-2	-15.941952	-21.48251	-10.401391	0.0000724
				4-2	-23.609176	-29.14974	-18.068615	0.0000038
				4-3	-7.667224	-13.20778	-2.126663	0.0094377
Apical	HF	Tiempo 3h	<0,001	2-1	-12.425997	-15.41870	-9.433293	4.6e-06
				3-1	-21.387461	-24.38016	-18.394757	0.0e+00
				4-1	-33.439411	-36.43211	-30.446707	0.0e+00
				3-2	-8.961464	-11.95417	-5.968760	5.4e-05
				4-2	-21.013414	-24.00612	-18.020710	1.0e-07
				4-3	-12.051950	-15.04465	-9.059246	5.9e-06
Apical	HF	Tiempo 4h	<0,001	2-1	-17.548796	-31.86558	-3.232010	0.0184141
				3-1	-25.071133	-39.38792	-10.754347	0.0022559
				4-1	-36.534445	-50.85123	-22.217659	0.0001728
				3-2	-7.522337	-21.83912	6.794449	0.3909603
				4-2	-18.985649	-33.30243	-4.668863	0.0120048
				4-3	-11.463312	-25.78010	2.853474	0.1229214
Apical	SC	Tiempo 1h	<0,001	2-1	-4.301537	-7.913899	-0.6891754	0.0214307
				3-1	-8.028141	-11.640503	-4.4157791	0.0004583
				4-1	-12.196704	-15.809066	-8.5843419	0.0000221
				3-2	-3.726604	-7.338965	-0.1142418	0.0433703
				4-2	-7.895167	-11.507528	-4.2828047	0.0005145
				4-3	-4.168563	-7.780925	-0.5562010	0.0251761
Apical	SC	Tiempo 2h	<0,001	2-1	-2.660215	-3.566910	-1.753521	6.27e-05
				3-1	-6.621884	-7.528579	-5.715190	0.00e+00
				4-1	-9.791256	-10.697950	-8.884561	0.00e+00
				3-2	-3.961669	-4.868363	-3.054975	3.20e-06
				4-2	-7.131040	-8.037734	-6.224346	0.00e+00
				4-3	-3.169371	-4.076065	-2.262677	1.70e-05
Apical	SC	Tiempo 3h	<0,001	2-1	-2.004745	-4.645526	0.6360369	0.1479106
				3-1	-3.723731	-6.364513	-1.0829495	0.0084713
				4-1	-7.666625	-10.307407	-5.0258435	0.0000678
				3-2	-1.718986	-4.359768	0.9217953	0.2364687
				4-2	-5.661880	-8.302662	-3.0210988	0.0005872
				4-3	-3.942894	-6.583676	-1.3021124	0.0060552
Apical	SC	Tiempo 4h	<0,001	2-1	-2.674876	-5.311872	-0.03787961	0.0468686
				3-1	-5.428968	-8.065965	-2.79197222	0.0007747
				4-1	-6.933632	-9.570628	-4.29663594	0.0001394
				3-2	-2.754093	-5.391089	-0.11709641	0.0409539
				4-2	-4.258756	-6.895753	-1.62176013	0.0037576
				4-3	-1.504664	-4.141660	1.13233249	0.3285081
Apical	SF	Tiempo 1h	<0,001	2-1	-2.399936	-3.131306	-1.668565	2.73e-05
				3-1	-5.323079	-6.054450	-4.591709	0.00e+00
				4-1	-8.652769	-9.384139	-7.921398	0.00e+00
				3-2	-2.923144	-3.654514	-2.191774	6.20e-06
				4-2	-6.252833	-6.984203	-5.521463	0.00e+00
				4-3	-3.329689	-4.061059	-2.598319	2.30e-06
Apical	SF	Tiempo 2h	<0,001	2-1	-1.438367	-3.489436	0.6127024	0.1906479
				3-1	-4.829805	-6.880875	-2.7787360	0.0003059
				4-1	-8.341221	-10.392290	-6.2901516	0.0000054
				3-2	-3.391438	-5.442508	-1.3403690	0.0032451
				4-2	-6.902854	-8.953923	-4.8517846	0.0000226
				4-3	-3.511416	-5.562485	-1.4603461	0.0026063
Apical	SF	Tiempo 3h	<0,001	2-1	-0.4438358	-3.406669	2.5189972	0.9614848
				3-1	-3.8693566	-6.832190	-0.9065237	0.0130689
				4-1	-6.2513204	-9.214153	-3.2884875	0.0006554
				3-2	-3.4255208	-6.388354	-0.4626879	0.0249348
				4-2	-5.8074846	-8.770318	-2.8446517	0.0010783
				4-3	-2.3819638	-5.344797	0.5808691	0.1211413
Apical	SF	Tiempo 4h	0.003	2-1	-1.970467	-5.329904	1.38897030	0.3083010
				3-1	-3.389039	-6.748477	-0.02960197	0.0480546
				4-1	-5.936062	-9.295500	-2.57662491	0.0021293
				3-2	-1.418572	-4.778010	1.94086510	0.5588873
				4-2	-3.965595	-7.325033	-0.60615784	0.0224203
				4-3	-2.547023	-5.906460	0.81241443	0.1485532

## Sheet: POL2way_Extract_Dose
BASAL - Extracts & Doses at Time = 1h							BASAL – Extracts & Doses at Time = 2h							BASAL – Extracts & Doses at Time = 3h							BASAL – Extracts & Doses at Time = 4h							APICAL - Extracts & Doses at Time = 1h							APICAL - Extracts & Doses at Time = 2h							APICAL - Extracts & Doses at Time = 3h							APICAL - Extracts & Doses at Time = 4h
	Df	Sum Sq	Mean Sq	F value	Pr(>F)			Df	Sum Sq	Mean Sq	F value	Pr(>F)			Df	Sum Sq	Mean Sq	F value	Pr(>F)			Df	Sum Sq	Mean Sq	F value	Pr(>F)			Df	Sum Sq	Mean Sq	F value	Pr(>F)			Df	Sum Sq	Mean Sq	F value	Pr(>F)			Df	Sum Sq	Mean Sq	F value	Pr(>F)
Extract	3	104.83	34.94	284.04	< 2e-16 ***		Extract	3	127.85	42.62	196.34	< 2e-16 ***		Extract	3	216.55	72.18	201.14	< 2e-16 ***		Extract	3	505.7	168.56	80218	1.99e-14 ***		Extract	3	12151	4050	3861.4	<2e-16 ***		Extract	3	9960	3320	384.94	< 2e-16 ***		Extract	3	5583	1860.9	442.33	< 2e-16 ***		Extract
Dose	3	20.28	6.76	54.94	1.01e-12 ***		Dose	3	22.16	7.39	34.04	8.75e-10 ***		Dose	3	51.73	17.24	48.05	9.15e-12 ***		Dose	3	187.9	62.62	29801	3.93e-09 ***		Dose	3	4203	1401	1335.6	<2e-16 ***		Dose	3	3379	1126	130.61	< 2e-16 ***		Dose	3	2890	963.4	229.01	< 2e-16 ***		Dose
Extract:Dose at Time==1	9	20.55	2.28	18.57	2.49e-10 ***		Extract:Dose at Time==2	9	37.63	4.18	19.26	3.70e-10 ***		Extract:Dose at Time==3	9	39.80	4.42	12.32	5.20e-08 ***		Extract:Dose at Time==4	9	176.9	19.66	9356	1.33e-06 ***		Extract:Dose at Time==1	9	1694	188	179.4	<2e-16 ***		Extract:Dose at Time==2	9	1212	135	15.61	2.24e-09 ***		Extract:Dose at Time==3	9	1285	142.8	33.95	6.83e-14 ***		Extract:Dose at Time==4
Residuals	32	3.94	0.12				Residuals	30	6.51	0.22				Residuals	31	11.12	0.36				Residuals	30	63.0	2.10				Residuals	31	33	1				Residuals	32	276	9				Residuals	32	135	4.2				Residuals
	diff	lwr	upr	p adj				diff	lwr	upr	p adj				diff	lwr	upr	p adj				diff	lwr	upr	p adj				diff	lwr	upr	p adj				diff	lwr	upr	p adj				diff	lwr	upr	p adj
HF:1-HC:1	-1.101541e+00	-2.16347557	-0.03960693	0.0359358			HF:1-HC:1	-5.183200e+00	-6.6010827	-3.765318300	0.0000000			HF:1-HC:1	-3.144406e+00	-4.96268777	-1.32612492	0.0000365			HF:1-HC:1	-3.144406e+00	-4.96268777	-1.32612492	0.0000365			HF:1-HC:1	-10.6642890	-13.7728665	-7.5557115	0.0000000			HF:1-HC:1	-7.9723520	-16.8637537	0.9190497	0.1178757			HF:1-HC:1	-6.6144534	-12.8243619	-0.404544844	0.0279130			HF:1-HC:1
SC:1-HC:1	-5.331709e+00	-6.39364314	-4.26977450	0.0000000			SC:1-HC:1	-7.335049e+00	-8.7529313	-5.917166912	0.0000000			SC:1-HC:1	-7.430413e+00	-9.24869472	-5.61213187	0.0000000			SC:1-HC:1	-7.430413e+00	-9.24869472	-5.61213187	0.0000000			SC:1-HC:1	-50.4582689	-53.5668464	-47.3496914	0.0000000			SC:1-HC:1	-44.7617242	-53.6531258	-35.8703225	0.0000000			SC:1-HC:1	-37.9217030	-44.1316115	-31.711794416	0.0000000			SC:1-HC:1
SF:1-HC:1	-5.331709e+00	-6.39364314	-4.26977450	0.0000000			SF:1-HC:1	-7.321995e+00	-8.7398776	-5.904113234	0.0000000			SF:1-HC:1	-8.292620e+00	-10.32552050	-6.25971963	0.0000000			SF:1-HC:1	-8.292620e+00	-10.32552050	-6.25971963	0.0000000			SF:1-HC:1	-54.9941443	-58.1027218	-51.8855668	0.0000000			SF:1-HC:1	-46.3286232	-55.2200249	-37.4372215	0.0000000			SF:1-HC:1	-38.9516291	-45.1615376	-32.741720547	0.0000000			SF:1-HC:1
HC:2-HC:1	-1.576317e+00	-2.63825142	-0.51438278	0.0004296			HC:2-HC:1	-3.234746e+00	-4.6526282	-1.816863854	0.0000002			HC:2-HC:1	-2.182419e+00	-4.00070032	-0.36413747	0.0078468			HC:2-HC:1	-2.182419e+00	-4.00070032	-0.36413747	0.0078468			HC:2-HC:1	-16.7502753	-19.8588528	-13.6416978	0.0000000			HC:2-HC:1	-11.3623883	-20.2537900	-2.4709866	0.0035713			HC:2-HC:1	-10.5205897	-16.7304983	-4.310681195	0.0000482			HC:2-HC:1
HF:2-HC:1	-2.554352e+00	-3.61628654	-1.49241791	0.0000000			HF:2-HC:1	-5.217590e+00	-6.6354727	-3.799708265	0.0000000			HF:2-HC:1	-4.893115e+00	-6.71139673	-3.07483388	0.0000000			HF:2-HC:1	-4.893115e+00	-6.71139673	-3.07483388	0.0000000			HF:2-HC:1	-27.8249026	-30.9334801	-24.7163251	0.0000000			HF:2-HC:1	-18.2905701	-27.1819718	-9.3991684	0.0000012			HF:2-HC:1	-19.0404505	-25.2503590	-12.830541963	0.0000000			HF:2-HC:1
SC:2-HC:1	-5.331709e+00	-6.39364314	-4.26977450	0.0000000			SC:2-HC:1	-7.397837e+00	-8.8157195	-5.979955128	0.0000000			SC:2-HC:1	-7.804100e+00	-9.62238142	-5.98581857	0.0000000			SC:2-HC:1	-7.804100e+00	-9.62238142	-5.98581857	0.0000000			SC:2-HC:1	-54.7598061	-57.8683836	-51.6512286	0.0000000			SC:2-HC:1	-47.4219395	-56.3133412	-38.5305378	0.0000000			SC:2-HC:1	-39.9264477	-46.1363563	-33.716539173	0.0000000			SC:2-HC:1
SF:2-HC:1	-5.331709e+00	-6.39364314	-4.26977450	0.0000000			SF:2-HC:1	-7.418856e+00	-8.8367378	-6.000973378	0.0000000			SF:2-HC:1	-8.604897e+00	-10.42317819	-6.78661534	0.0000000			SF:2-HC:1	-8.604897e+00	-10.42317819	-6.78661534	0.0000000			SF:2-HC:1	-57.3940798	-60.5026573	-54.2855023	0.0000000			SF:2-HC:1	-47.7669903	-56.6583919	-38.8755886	0.0000000			SF:2-HC:1	-39.3954649	-45.6053734	-33.185556330	0.0000000			SF:2-HC:1
HC:3-HC:1	-2.668637e+00	-3.73057151	-1.60670287	0.0000000			HC:3-HC:1	-4.815775e+00	-6.4010156	-3.230534657	0.0000000			HC:3-HC:1	-4.028432e+00	-5.84671379	-2.21015094	0.0000003			HC:3-HC:1	-4.028432e+00	-5.84671379	-2.21015094	0.0000003			HC:3-HC:1	-29.0644606	-32.1730381	-25.9558831	0.0000000			HC:3-HC:1	-21.8520272	-30.7434289	-12.9606255	0.0000000			HC:3-HC:1	-21.7996761	-28.0095846	-15.589767530	0.0000000			HC:3-HC:1
HF:3-HC:1	-3.460153e+00	-4.52208780	-2.39821916	0.0000000			HF:3-HC:1	-5.669300e+00	-7.0871820	-4.251417608	0.0000000			HF:3-HC:1	-5.110352e+00	-6.92863322	-3.29207037	0.0000000			HF:3-HC:1	-5.110352e+00	-6.92863322	-3.29207037	0.0000000			HF:3-HC:1	-36.7001892	-39.8087667	-33.5916117	0.0000000			HF:3-HC:1	-34.2325221	-43.1239238	-25.3411204	0.0000000			HF:3-HC:1	-28.0019144	-34.2118229	-21.792005839	0.0000000			HF:3-HC:1
SC:3-HC:1	-5.331709e+00	-6.39364314	-4.26977450	0.0000000			SC:3-HC:1	-7.342776e+00	-8.7606578	-5.924893396	0.0000000			SC:3-HC:1	-7.997703e+00	-9.81598420	-6.17942135	0.0000000			SC:3-HC:1	-7.997703e+00	-9.81598420	-6.17942135	0.0000000			SC:3-HC:1	-58.4864098	-61.5949873	-55.3778323	0.0000000			SC:3-HC:1	-51.3836085	-60.2750102	-42.4922068	0.0000000			SC:3-HC:1	-41.6454341	-47.8553426	-35.435525520	0.0000000			SC:3-HC:1
SF:3-HC:1	-5.331709e+00	-6.39364314	-4.26977450	0.0000000			SF:3-HC:1	-7.418856e+00	-8.8367378	-6.000973378	0.0000000			SF:3-HC:1	-8.410678e+00	-10.22895940	-6.59239654	0.0000000			SF:3-HC:1	-8.410678e+00	-10.22895940	-6.59239654	0.0000000			SF:3-HC:1	-60.3172236	-63.4258011	-57.2086461	0.0000000			SF:3-HC:1	-51.1584287	-60.0498304	-42.2670270	0.0000000			SF:3-HC:1	-42.8209857	-49.0308943	-36.611077177	0.0000000			SF:3-HC:1
HC:4-HC:1	-3.806494e+00	-4.86842843	-2.74455979	0.0000000			HC:4-HC:1	-5.600280e+00	-7.0181619	-4.182397514	0.0000000			HC:4-HC:1	-6.226070e+00	-8.04435178	-4.40778892	0.0000000			HC:4-HC:1	-6.226070e+00	-8.04435178	-4.40778892	0.0000000			HC:4-HC:1	-47.6637310	-51.1392263	-44.1882357	0.0000000			HC:4-HC:1	-36.6214918	-45.5128935	-27.7300901	0.0000000			HC:4-HC:1	-36.5076412	-42.7175498	-30.297732705	0.0000000			HC:4-HC:1
HF:4-HC:1	-4.334759e+00	-5.39669287	-3.27282423	0.0000000			HF:4-HC:1	-7.297912e+00	-8.8831529	-5.712671939	0.0000000			HF:4-HC:1	-7.399640e+00	-9.21792124	-5.58135839	0.0000000			HF:4-HC:1	-7.399640e+00	-9.21792124	-5.58135839	0.0000000			HF:4-HC:1	-50.7250675	-53.8336450	-47.6164900	0.0000000			HF:4-HC:1	-41.8997457	-50.7911473	-33.0083440	0.0000000			HF:4-HC:1	-40.0538643	-46.2637728	-33.843955761	0.0000000			HF:4-HC:1
SC:4-HC:1	-5.331709e+00	-6.39364314	-4.26977450	0.0000000			SC:4-HC:1	-7.418073e+00	-8.8359555	-6.000191101	0.0000000			SC:4-HC:1	-7.997585e+00	-9.81586642	-6.17930357	0.0000000			SC:4-HC:1	-7.997585e+00	-9.81586642	-6.17930357	0.0000000			SC:4-HC:1	-62.6549726	-65.7635501	-59.5463951	0.0000000			SC:4-HC:1	-54.5529797	-63.4443814	-45.6615780	0.0000000			SC:4-HC:1	-45.5883281	-51.7982367	-39.378419580	0.0000000			SC:4-HC:1
SF:4-HC:1	-5.331709e+00	-6.39364314	-4.26977450	0.0000000			SF:4-HC:1	-7.403311e+00	-8.8211931	-5.985428750	0.0000000			SF:4-HC:1	-8.604897e+00	-10.42317819	-6.78661534	0.0000000			SF:4-HC:1	-8.604897e+00	-10.42317819	-6.78661534	0.0000000			SF:4-HC:1	-63.6469128	-66.7554903	-60.5383353	0.0000000			SF:4-HC:1	-54.6698442	-63.5612459	-45.7784425	0.0000000			SF:4-HC:1	-45.2029495	-51.4128581	-38.993040977	0.0000000			SF:4-HC:1
SC:1-HF:1	-4.230168e+00	-5.29210189	-3.16823325	0.0000000			SC:1-HF:1	-2.151849e+00	-3.5697308	-0.733966418	0.0003402			SC:1-HF:1	-4.286007e+00	-6.10428838	-2.46772552	0.0000001			SC:1-HF:1	-4.286007e+00	-6.10428838	-2.46772552	0.0000001			SC:1-HF:1	-39.7939799	-42.9025574	-36.6854024	0.0000000			SC:1-HF:1	-36.7893722	-45.6807739	-27.8979705	0.0000000			SC:1-HF:1	-31.3072496	-37.5171581	-25.097341030	0.0000000			SC:1-HF:1
SF:1-HF:1	-4.230168e+00	-5.29210189	-3.16823325	0.0000000			SF:1-HF:1	-2.138795e+00	-3.5566771	-0.720912741	0.0003734			SF:1-HF:1	-5.148214e+00	-7.18111415	-3.11531328	0.0000000			SF:1-HF:1	-5.148214e+00	-7.18111415	-3.11531328	0.0000000			SF:1-HF:1	-44.3298553	-47.4384328	-41.2212778	0.0000000			SF:1-HF:1	-38.3562713	-47.2476729	-29.4648696	0.0000000			SF:1-HF:1	-32.3371757	-38.5470842	-26.127267161	0.0000000			SF:1-HF:1
HC:2-HF:1	-4.747759e-01	-1.53671017	0.58715847	0.9433363			HC:2-HF:1	1.948454e+00	0.5305723	3.366336639	0.0014428			HC:2-HF:1	9.619875e-01	-0.85629397	2.78026888	0.8248916			HC:2-HF:1	9.619875e-01	-0.85629397	2.78026888	0.8248916			HC:2-HF:1	-6.0859863	-9.1945638	-2.9774088	0.0000036			HC:2-HF:1	-3.3900364	-12.2814380	5.5013653	0.9847122			HC:2-HF:1	-3.9061364	-10.1160449	2.303772191	0.6049977			HC:2-HF:1
HF:2-HF:1	-1.452811e+00	-2.51474529	-0.39087665	0.0014288			HF:2-HF:1	-3.438997e-02	-1.4522722	1.383492228	1.0000000			HF:2-HF:1	-1.748709e+00	-3.56699039	0.06957247	0.0692768			HF:2-HF:1	-1.748709e+00	-3.56699039	0.06957247	0.0692768			HF:2-HF:1	-17.1606136	-20.2691911	-14.0520361	0.0000000			HF:2-HF:1	-10.3182182	-19.2096198	-1.4268165	0.0113761			HF:2-HF:1	-12.4259971	-18.6359057	-6.216088577	0.0000020			HF:2-HF:1
SC:2-HF:1	-4.230168e+00	-5.29210189	-3.16823325	0.0000000			SC:2-HF:1	-2.214637e+00	-3.6325190	-0.796754634	0.0002173			SC:2-HF:1	-4.659694e+00	-6.47797507	-2.84141222	0.0000000			SC:2-HF:1	-4.659694e+00	-6.47797507	-2.84141222	0.0000000			SC:2-HF:1	-44.0955171	-47.2040946	-40.9869396	0.0000000			SC:2-HF:1	-39.4495876	-48.3409892	-30.5581859	0.0000000			SC:2-HF:1	-33.3119943	-39.5219029	-27.102085788	0.0000000			SC:2-HF:1
SF:2-HF:1	-4.230168e+00	-5.29210189	-3.16823325	0.0000000			SF:2-HF:1	-2.235655e+00	-3.6535373	-0.817772884	0.0001871			SF:2-HF:1	-5.460490e+00	-7.27877185	-3.64220899	0.0000000			SF:2-HF:1	-5.460490e+00	-7.27877185	-3.64220899	0.0000000			SF:2-HF:1	-46.7297908	-49.8383683	-43.6212133	0.0000000			SF:2-HF:1	-39.7946383	-48.6860400	-30.9032366	0.0000000			SF:2-HF:1	-32.7810115	-38.9909200	-26.571102945	0.0000000			SF:2-HF:1
HC:3-HF:1	-1.567096e+00	-2.62903026	-0.50516162	0.0004702			HC:3-HF:1	3.674254e-01	-1.2178151	1.952665837	0.9999210			HC:3-HF:1	-8.840260e-01	-2.70230745	0.93425541	0.8955520			HC:3-HF:1	-8.840260e-01	-2.70230745	0.93425541	0.8955520			HC:3-HF:1	-18.4001716	-21.5087491	-15.2915941	0.0000000			HC:3-HF:1	-13.8796752	-22.7710769	-4.9882735	0.0001933			HC:3-HF:1	-15.1852227	-21.3951312	-8.975314145	0.0000000			HC:3-HF:1
HF:3-HF:1	-2.358612e+00	-3.42054655	-1.29667791	0.0000002			HF:3-HF:1	-4.860993e-01	-1.9039815	0.931782886	0.9938991			HF:3-HF:1	-1.965945e+00	-3.78422687	-0.14766402	0.0242055			HF:3-HF:1	-1.965945e+00	-3.78422687	-0.14766402	0.0242055			HF:3-HF:1	-26.0359002	-29.1444777	-22.9273227	0.0000000			HF:3-HF:1	-26.2601701	-35.1515718	-17.3687684	0.0000000			HF:3-HF:1	-21.3874610	-27.5973695	-15.177552453	0.0000000			HF:3-HF:1
SC:3-HF:1	-4.230168e+00	-5.29210189	-3.16823325	0.0000000			SC:3-HF:1	-2.159575e+00	-3.5774573	-0.741692903	0.0003220			SC:3-HF:1	-4.853296e+00	-6.67157785	-3.03501500	0.0000000			SC:3-HF:1	-4.853296e+00	-6.67157785	-3.03501500	0.0000000			SC:3-HF:1	-47.8221208	-50.9306983	-44.7135433	0.0000000			SC:3-HF:1	-43.4112565	-52.3026582	-34.5198548	0.0000000			SC:3-HF:1	-35.0309807	-41.2408892	-28.821072134	0.0000000			SC:3-HF:1
SF:3-HF:1	-4.230168e+00	-5.29210189	-3.16823325	0.0000000			SF:3-HF:1	-2.235655e+00	-3.6535373	-0.817772884	0.0001871			SF:3-HF:1	-5.266272e+00	-7.08455305	-3.44799020	0.0000000			SF:3-HF:1	-5.266272e+00	-7.08455305	-3.44799020	0.0000000			SF:3-HF:1	-49.6529346	-52.7615121	-46.5443571	0.0000000			SF:3-HF:1	-43.1860767	-52.0774784	-34.2946750	0.0000000			SF:3-HF:1	-36.2065323	-42.4164409	-29.996623791	0.0000000			SF:3-HF:1
HC:4-HF:1	-2.704953e+00	-3.76688717	-1.64301854	0.0000000			HC:4-HF:1	-4.170792e-01	-1.8349614	1.000802979	0.9987460			HC:4-HF:1	-3.081664e+00	-4.89994543	-1.26338258	0.0000520			HC:4-HF:1	-3.081664e+00	-4.89994543	-1.26338258	0.0000520			HC:4-HF:1	-36.9994420	-40.4749374	-33.5239467	0.0000000			HC:4-HF:1	-28.6491399	-37.5405415	-19.7577382	0.0000000			HC:4-HF:1	-29.8931879	-36.1030964	-23.683279319	0.0000000			HC:4-HF:1
HF:4-HF:1	-3.233217e+00	-4.29515162	-2.17128298	0.0000000			HF:4-HF:1	-2.114712e+00	-3.6999524	-0.529471445	0.0021542			HF:4-HF:1	-4.255233e+00	-6.07351490	-2.43695204	0.0000001			HF:4-HF:1	-4.255233e+00	-6.07351490	-2.43695204	0.0000001			HF:4-HF:1	-40.0607785	-43.1693560	-36.9522010	0.0000000			HF:4-HF:1	-33.9273937	-42.8187954	-25.0359920	0.0000000			HF:4-HF:1	-33.4394109	-39.6493195	-27.229502375	0.0000000			HF:4-HF:1
SC:4-HF:1	-4.230168e+00	-5.29210189	-3.16823325	0.0000000			SC:4-HF:1	-2.234873e+00	-3.6527550	-0.816990607	0.0001881			SC:4-HF:1	-4.853179e+00	-6.67146008	-3.03489722	0.0000000			SC:4-HF:1	-4.853179e+00	-6.67146008	-3.03489722	0.0000000			SC:4-HF:1	-51.9906836	-55.0992612	-48.8821061	0.0000000			SC:4-HF:1	-46.5806277	-55.4720294	-37.6892260	0.0000000			SC:4-HF:1	-38.9738747	-45.1837833	-32.763966194	0.0000000			SC:4-HF:1
SF:4-HF:1	-4.230168e+00	-5.29210189	-3.16823325	0.0000000			SF:4-HF:1	-2.220110e+00	-3.6379926	-0.802228257	0.0002090			SF:4-HF:1	-5.460490e+00	-7.27877185	-3.64220899	0.0000000			SF:4-HF:1	-5.460490e+00	-7.27877185	-3.64220899	0.0000000			SF:4-HF:1	-52.9826238	-56.0912013	-49.8740463	0.0000000			SF:4-HF:1	-46.6974923	-55.5888939	-37.8060906	0.0000000			SF:4-HF:1	-38.5884961	-44.7984047	-32.378587591	0.0000000			SF:4-HF:1
SF:1-SC:1	-1.110223e-16	-1.06193432	1.06193432	1.0000000			SF:1-SC:1	1.305368e-02	-1.4048285	1.430935871	1.0000000			SF:1-SC:1	-8.622068e-01	-2.89510720	1.17069367	0.9611846			SF:1-SC:1	-8.622068e-01	-2.89510720	1.17069367	0.9611846			SF:1-SC:1	-4.5358754	-7.6444529	-1.4272979	0.0005851			SF:1-SC:1	-1.5668991	-10.4583008	7.3245026	0.9999979			SF:1-SC:1	-1.0299261	-7.2398347	5.179982411	0.9999991			SF:1-SC:1
HC:2-SC:1	3.755392e+00	2.69345740	4.81732604	0.0000000			HC:2-SC:1	4.100303e+00	2.6824209	5.518185251	0.0000000			HC:2-SC:1	5.247994e+00	3.42971298	7.06627583	0.0000000			HC:2-SC:1	5.247994e+00	3.42971298	7.06627583	0.0000000			HC:2-SC:1	33.7079936	30.5994161	36.8165711	0.0000000			HC:2-SC:1	33.3993358	24.5079341	42.2907375	0.0000000			HC:2-SC:1	27.4011132	21.1912047	33.611021763	0.0000000			HC:2-SC:1
HF:2-SC:1	2.777357e+00	1.71542228	3.83929092	0.0000000			HF:2-SC:1	2.117459e+00	0.6995765	3.535340841	0.0004348			HF:2-SC:1	2.537298e+00	0.71901656	4.35557942	0.0011207			HF:2-SC:1	2.537298e+00	0.71901656	4.35557942	0.0011207			HF:2-SC:1	22.6333663	19.5247888	25.7419438	0.0000000			HF:2-SC:1	26.4711540	17.5797523	35.3625557	0.0000000			HF:2-SC:1	18.8812525	12.6713439	25.091160995	0.0000000			HF:2-SC:1
SC:2-SC:1	-2.775558e-16	-1.06193432	1.06193432	1.0000000			SC:2-SC:1	-6.278822e-02	-1.4806704	1.355093978	1.0000000			SC:2-SC:1	-3.736867e-01	-2.19196812	1.44459473	0.9999835			SC:2-SC:1	-3.736867e-01	-2.19196812	1.44459473	0.9999835			SC:2-SC:1	-4.3015373	-7.4101148	-1.1929598	0.0012618			SC:2-SC:1	-2.6602154	-11.5516171	6.2311863	0.9986300			SC:2-SC:1	-2.0047448	-8.2146533	4.205163785	0.9969349			SC:2-SC:1
SF:2-SC:1	8.326673e-16	-1.06193432	1.06193432	1.0000000			SF:2-SC:1	-8.380647e-02	-1.5016887	1.334075728	1.0000000			SF:2-SC:1	-1.174483e+00	-2.99276490	0.64379796	0.5600355			SF:2-SC:1	-1.174483e+00	-2.99276490	0.64379796	0.5600355			SF:2-SC:1	-6.9358109	-10.0443884	-3.8272334	0.0000002			SF:2-SC:1	-3.0052661	-11.8966678	5.8861356	0.9951173			SF:2-SC:1	-1.4737619	-7.6836705	4.736146628	0.9999059			SF:2-SC:1
HC:3-SC:1	2.663072e+00	1.60113731	3.72500595	0.0000000			HC:3-SC:1	2.519274e+00	0.9340335	4.104514449	0.0001649			HC:3-SC:1	3.401981e+00	1.58369950	5.22026236	0.0000086			HC:3-SC:1	3.401981e+00	1.58369950	5.22026236	0.0000086			HC:3-SC:1	21.3938083	18.2852307	24.5023858	0.0000000			HC:3-SC:1	22.9096970	14.0182953	31.8010986	0.0000000			HC:3-SC:1	16.1220269	9.9121183	22.331935428	0.0000000			HC:3-SC:1
HF:3-SC:1	1.871555e+00	0.80962102	2.93348966	0.0000237			HF:3-SC:1	1.665749e+00	0.2478671	3.083631498	0.0101747			HF:3-SC:1	2.320062e+00	0.50178008	4.13834293	0.0037290			HF:3-SC:1	2.320062e+00	0.50178008	4.13834293	0.0037290			HF:3-SC:1	13.7580797	10.6495022	16.8666572	0.0000000			HF:3-SC:1	10.5292021	1.6378004	19.4206038	0.0090380			HF:3-SC:1	9.9197886	3.7098800	16.129697119	0.0001322			HF:3-SC:1
SC:3-SC:1	-8.326673e-16	-1.06193432	1.06193432	1.0000000			SC:3-SC:1	-7.726484e-03	-1.4256087	1.410155710	1.0000000			SC:3-SC:1	-5.672895e-01	-2.38557090	1.25099195	0.9977568			SC:3-SC:1	-5.672895e-01	-2.38557090	1.25099195	0.9977568			SC:3-SC:1	-8.0281409	-11.1367184	-4.9195634	0.0000000			SC:3-SC:1	-6.6218843	-15.5132860	2.2695173	0.3384411			SC:3-SC:1	-3.7237311	-9.9336396	2.486177439	0.6759121			SC:3-SC:1
SF:3-SC:1	3.330669e-16	-1.06193432	1.06193432	1.0000000			SF:3-SC:1	-8.380647e-02	-1.5016887	1.334075728	1.0000000			SF:3-SC:1	-9.802647e-01	-2.79854610	0.83801676	0.8055397			SF:3-SC:1	-9.802647e-01	-2.79854610	0.83801676	0.8055397			SF:3-SC:1	-9.8589547	-12.9675322	-6.7503772	0.0000000			SF:3-SC:1	-6.3967045	-15.2881062	2.4946972	0.3915107			SF:3-SC:1	-4.8992828	-11.1091913	1.310625781	0.2566511			SF:3-SC:1
HC:4-SC:1	1.525215e+00	0.46328040	2.58714903	0.0007077			HC:4-SC:1	1.734769e+00	0.3168872	3.152651591	0.0063764			HC:4-SC:1	1.204343e+00	-0.61393848	3.02262438	0.5201833			HC:4-SC:1	1.204343e+00	-0.61393848	3.02262438	0.5201833			HC:4-SC:1	2.7945378	-0.6809575	6.2700331	0.2304320			HC:4-SC:1	8.1402323	-0.7511694	17.0316340	0.1015064			HC:4-SC:1	1.4140617	-4.7958468	7.623970253	0.9999434			HC:4-SC:1
HF:4-SC:1	9.969503e-01	-0.06498405	2.05888459	0.0840195			HF:4-SC:1	3.713668e-02	-1.5481038	1.622377167	1.0000000			HF:4-SC:1	3.077348e-02	-1.78750795	1.84905491	1.0000000			HF:4-SC:1	3.077348e-02	-1.78750795	1.84905491	1.0000000			HF:4-SC:1	-0.2667986	-3.3753761	2.8417789	1.0000000			HF:4-SC:1	2.8619785	-6.0294232	11.7533802	0.9970266			HF:4-SC:1	-2.1321613	-8.3420699	4.077747197	0.9942954			HF:4-SC:1
SC:4-SC:1	1.221245e-15	-1.06193432	1.06193432	1.0000000			SC:4-SC:1	-8.302419e-02	-1.5009064	1.334858005	1.0000000			SC:4-SC:1	-5.671717e-01	-2.38545313	1.25110973	0.9977617			SC:4-SC:1	-5.671717e-01	-2.38545313	1.25110973	0.9977617			SC:4-SC:1	-12.1967038	-15.3052813	-9.0881263	0.0000000			SC:4-SC:1	-9.7912555	-18.6826572	-0.8998539	0.0199873			SC:4-SC:1	-7.6666252	-13.8765337	-1.456716621	0.0055059			SC:4-SC:1
SF:4-SC:1	9.992007e-16	-1.06193432	1.06193432	1.0000000			SF:4-SC:1	-6.826184e-02	-1.4861440	1.349620356	1.0000000			SF:4-SC:1	-1.174483e+00	-2.99276490	0.64379796	0.5600355			SF:4-SC:1	-1.174483e+00	-2.99276490	0.64379796	0.5600355			SF:4-SC:1	-13.1886439	-16.2972214	-10.0800664	0.0000000			SF:4-SC:1	-9.9081201	-18.7995217	-1.0167184	0.0176651			SF:4-SC:1	-7.2812466	-13.4911551	-1.071338019	0.0101246			SF:4-SC:1
HC:2-SF:1	3.755392e+00	2.69345740	4.81732604	0.0000000			HC:2-SF:1	4.087249e+00	2.6693672	5.505131574	0.0000000			HC:2-SF:1	6.110201e+00	4.07730073	8.14310160	0.0000000			HC:2-SF:1	6.110201e+00	4.07730073	8.14310160	0.0000000			HC:2-SF:1	38.2438690	35.1352915	41.3524465	0.0000000			HC:2-SF:1	34.9662349	26.0748332	43.8576366	0.0000000			HC:2-SF:1	28.4310394	22.2211308	34.640947894	0.0000000			HC:2-SF:1
HF:2-SF:1	2.777357e+00	1.71542228	3.83929092	0.0000000			HF:2-SF:1	2.104405e+00	0.6865228	3.522287163	0.0004772			HF:2-SF:1	3.399505e+00	1.36660432	5.43240519	0.0000656			HF:2-SF:1	3.399505e+00	1.36660432	5.43240519	0.0000656			HF:2-SF:1	27.1692416	24.0606641	30.2778191	0.0000000			HF:2-SF:1	28.0380531	19.1466514	36.9294548	0.0000000			HF:2-SF:1	19.9111786	13.7012700	26.121087126	0.0000000			HF:2-SF:1
SC:2-SF:1	-1.665335e-16	-1.06193432	1.06193432	1.0000000			SC:2-SF:1	-7.584189e-02	-1.4937241	1.342040300	1.0000000			SC:2-SF:1	4.885201e-01	-1.54438037	2.52142051	0.9998843			SC:2-SF:1	4.885201e-01	-1.54438037	2.52142051	0.9998843			SC:2-SF:1	0.2343381	-2.8742394	3.3429156	1.0000000			SC:2-SF:1	-1.0933163	-9.9847180	7.7980854	1.0000000			SC:2-SF:1	-0.9748186	-7.1847272	5.235089916	0.9999996			SC:2-SF:1
SF:2-SF:1	9.436896e-16	-1.06193432	1.06193432	1.0000000			SF:2-SF:1	-9.686014e-02	-1.5147423	1.321022050	1.0000000			SF:2-SF:1	-3.122767e-01	-2.34517714	1.72062373	0.9999997			SF:2-SF:1	-3.122767e-01	-2.34517714	1.72062373	0.9999997			SF:2-SF:1	-2.3999355	-5.5085130	0.7086420	0.2841598			SF:2-SF:1	-1.4383670	-10.3297687	7.4530347	0.9999993			SF:2-SF:1	-0.4438358	-6.6537443	5.766072759	1.0000000			SF:2-SF:1
HC:3-SF:1	2.663072e+00	1.60113731	3.72500595	0.0000000			HC:3-SF:1	2.506220e+00	0.9209798	4.091460772	0.0001792			HC:3-SF:1	4.264188e+00	2.23128726	6.29708813	0.0000009			HC:3-SF:1	4.264188e+00	2.23128726	6.29708813	0.0000009			HC:3-SF:1	25.9296836	22.8211061	29.0382611	0.0000000			HC:3-SF:1	24.4765960	15.5851944	33.3679977	0.0000000			HC:3-SF:1	17.1519530	10.9420445	23.361861559	0.0000000			HC:3-SF:1
HF:3-SF:1	1.871555e+00	0.80962102	2.93348966	0.0000237			HF:3-SF:1	1.652696e+00	0.2348134	3.070577820	0.0111045			HF:3-SF:1	3.182268e+00	1.14936783	5.21516870	0.0001966			HF:3-SF:1	3.182268e+00	1.14936783	5.21516870	0.0001966			HF:3-SF:1	18.2939551	15.1853776	21.4025326	0.0000000			HF:3-SF:1	12.0961011	3.2046995	20.9875028	0.0015453			HF:3-SF:1	10.9497147	4.7398062	17.159623251	0.0000235			HF:3-SF:1
SC:3-SF:1	-7.216450e-16	-1.06193432	1.06193432	1.0000000			SC:3-SF:1	-2.078016e-02	-1.4386624	1.397102032	1.0000000			SC:3-SF:1	2.949173e-01	-1.73798315	2.32781773	0.9999998			SC:3-SF:1	2.949173e-01	-1.73798315	2.32781773	0.9999998			SC:3-SF:1	-3.4922655	-6.6008430	-0.3836880	0.0163541			SC:3-SF:1	-5.0549853	-13.9463870	3.8364164	0.7473127			SC:3-SF:1	-2.6938050	-8.9037135	3.516103570	0.9549681			SC:3-SF:1
SF:3-SF:1	4.440892e-16	-1.06193432	1.06193432	1.0000000			SF:3-SF:1	-9.686014e-02	-1.5147423	1.321022050	1.0000000			SF:3-SF:1	-1.180579e-01	-2.15095834	1.91484253	1.0000000			SF:3-SF:1	-1.180579e-01	-2.15095834	1.91484253	1.0000000			SF:3-SF:1	-5.3230793	-8.4316568	-2.2145018	0.0000434			SF:3-SF:1	-4.8298054	-13.7212071	4.0615962	0.8005840			SF:3-SF:1	-3.8693566	-10.0792652	2.340551912	0.6194427			SF:3-SF:1
HC:4-SF:1	1.525215e+00	0.46328040	2.58714903	0.0007077			HC:4-SF:1	1.721716e+00	0.3038335	3.139597914	0.0069698			HC:4-SF:1	2.066550e+00	0.03364928	4.09945015	0.0432771			HC:4-SF:1	2.066550e+00	0.03364928	4.09945015	0.0432771			HC:4-SF:1	7.3304132	3.8549179	10.8059085	0.0000008			HC:4-SF:1	9.7071314	0.8157297	18.5985331	0.0218332			HC:4-SF:1	2.4439878	-3.7659207	8.653896384	0.9797749			HC:4-SF:1
HF:4-SF:1	9.969503e-01	-0.06498405	2.05888459	0.0840195			HF:4-SF:1	2.408300e-02	-1.5611575	1.609323489	1.0000000			HF:4-SF:1	8.929802e-01	-1.13992019	2.92588068	0.9490543			HF:4-SF:1	8.929802e-01	-1.13992019	2.92588068	0.9490543			HF:4-SF:1	4.2690768	1.1604993	7.3776543	0.0014027			HF:4-SF:1	4.4288776	-4.4625241	13.3202793	0.8803894			HF:4-SF:1	-1.1022352	-7.3121438	5.107673329	0.9999977			HF:4-SF:1
SC:4-SF:1	1.332268e-15	-1.06193432	1.06193432	1.0000000			SC:4-SF:1	-9.607787e-02	-1.5139601	1.321804327	1.0000000			SC:4-SF:1	2.950351e-01	-1.73786537	2.32793550	0.9999998			SC:4-SF:1	2.950351e-01	-1.73786537	2.32793550	0.9999998			SC:4-SF:1	-7.6608284 -	10.7694059	-4.5522509	0.0000000			SC:4-SF:1	-8.2243565	-17.1157582	0.6670452	0.0940581			SC:4-SF:1	-6.6366990	-12.8466076	-0.426790490	0.0270111			SC:4-SF:1
SF:4-SF:1	1.110223e-15	-1.06193432	1.06193432	1.0000000			SF:4-SF:1	-8.131552e-02	-1.4991977	1.336566678	1.0000000			SF:4-SF:1	-3.122767e-01	-2.34517714	1.72062373	0.9999997			SF:4-SF:1	-3.122767e-01	-2.34517714	1.72062373	0.9999997			SF:4-SF:1	-8.6527686 -	11.7613461	-5.5441911	0.0000000			SF:4-SF:1	-8.3412210	-17.2326227	0.5501807	0.0844931			SF:4-SF:1	-6.2513204	-12.4612290	-0.041411888	0.0471667			SF:4-SF:1
HF:2-HC:2	-9.780351e-01	-2.03996944	0.08389920	0.0971359			HF:2-HC:2	-1.982844e+00	-3.4007266	-0.564962217	0.0011316			HF:2-HC:2	-2.710696e+00	-4.52897784	-0.89241499	0.0004231			HF:2-HC:2	-2.710696e+00	-4.52897784	-0.89241499	0.0004231			HF:2-HC:2 -	11.0746273 -	14.1832048	-7.9660498	0.0000000			HF:2-HC:2	-6.9281818	-15.8195835	1.9632199	0.2734355			HF:2-HC:2	-8.5198608	-14.7297693	-2.309952225	0.0013728			HF:2-HC:2
SC:2-HC:2	-3.755392e+00	-4.81732604	-2.69345740	0.0000000			SC:2-HC:2	-4.163091e+00	-5.5809735	-2.745209080	0.0000000			SC:2-HC:2	-5.621681e+00	-7.43996252	-3.80339967	0.0000000			SC:2-HC:2	-5.621681e+00	-7.43996252	-3.80339967	0.0000000			SC:2-HC:2 -	38.0095309 -	41.1181084 -	34.9009534	0.0000000			SC:2-HC:2	-36.0595512	-44.9509529	-27.1681495	0.0000000			SC:2-HC:2	-29.4058580	-35.6157665	-23.195949436	0.0000000			SC:2-HC:2
SF:2-HC:2	-3.755392e+00	-4.81732604	-2.69345740	0.0000000			SF:2-HC:2	-4.184110e+00	-5.6019917	-2.766227330	0.0000000			SF:2-HC:2	-6.422478e+00	-8.24075930	-4.60419645	0.0000000			SF:2-HC:2	-6.422478e+00	-8.24075930	-4.60419645	0.0000000			SF:2-HC:2 -	40.6438045 -	43.7523820 -	37.5352270	0.0000000			SF:2-HC:2	-36.4046019	-45.2960036	-27.5132002	0.0000000			SF:2-HC:2	-28.8748751	-35.0847837	-22.664966593	0.0000000			SF:2-HC:2
HC:3-HC:2	-1.092320e+00	-2.15425441	-0.03038577	0.0388414			HC:3-HC:2	-1.581029e+00	-3.1662696	0.004211392	0.0511549			HC:3-HC:2	-1.846013e+00	-3.66429490	-0.02773205	0.0437739			HC:3-HC:2	-1.846013e+00	-3.66429490	-0.02773205	0.0437739			HC:3-HC:2 -	12.3141854 -	15.4227629	-9.2056079	0.0000000			HC:3-HC:2	-10.4896389	-19.3810405	-1.5982372	0.0094381			HC:3-HC:2	-11.2790863	-17.4889949	-5.069177793	0.0000135			HC:3-HC:2
HF:3-HC:2	-1.883836e+00	-2.94577070	-0.82190206	0.0000210			HF:3-HC:2	-2.434554e+00	-3.8524359	-1.016671560	0.0000453			HF:3-HC:2	-2.927933e+00	-4.74621433	-1.10965147	0.0001239			HF:3-HC:2	-2.927933e+00	-4.74621433	-1.10965147	0.0001239			HF:3-HC:2 -	19.9499139 -	23.0584914 -	16.8413364	0.0000000			HF:3-HC:2	-22.8701337	-31.7615354	-13.9787321	0.0000000			HF:3-HC:2	-17.4813246	-23.6912332	-11.271416101	0.0000000			HF:3-HC:2
SC:3-HC:2	-3.755392e+00	-4.81732604	-2.69345740	0.0000000			SC:3-HC:2	-4.108030e+00	-5.5259117	-2.690147348	0.0000000			SC:3-HC:2	-5.815284e+00	-7.63356531	-3.99700245	0.0000000			SC:3-HC:2	-5.815284e+00	-7.63356531	-3.99700245	0.0000000			SC:3-HC:2 -	41.7361345 -	44.8447120 -	38.6275570	0.0000000			SC:3-HC:2	-40.0212202	-48.9126219	-31.1298185	0.0000000			SC:3-HC:2	-31.1248443	-37.3347529	-24.914935782	0.0000000			SC:3-HC:2
SF:3-HC:2	-3.755392e+00	-4.81732604	-2.69345740	0.0000000			SF:3-HC:2	-4.184110e+00	-5.6019917	-2.766227330	0.0000000			SF:3-HC:2	-6.228259e+00	-8.04654050	-4.40997765	0.0000000			SF:3-HC:2	-6.228259e+00	-8.04654050	-4.40997765	0.0000000			SF:3-HC:2 -	43.5669483 -	46.6755258 -	40.4583708	0.0000000			SF:3-HC:2	-39.7960403	-48.6874420	-30.9046387	0.0000000			SF:3-HC:2	-32.3003960	-38.5103045	-26.090487440	0.0000000			SF:3-HC:2
HC:4-HC:2	-2.230177e+00	-3.29211132	-1.16824269	0.0000007			HC:4-HC:2	-2.365534e+00	-3.7834159	-0.947651466	0.0000741			HC:4-HC:2	-4.043651e+00	-5.86193288	-2.22537003	0.0000003			HC:4-HC:2	-4.043651e+00	-5.86193288	-2.22537003	0.0000003			HC:4-HC:2 -	30.9134558 -	34.3889511 -	27.4379605	0.0000000			HC:4-HC:2	-25.2591035	-34.1505052	-16.3677018	0.0000000			HC:4-HC:2	-25.9870515	-32.1969601	-19.777142968	0.0000000			HC:4-HC:2
HF:4-HC:2	-2.758441e+00	-3.82037577	-1.69650713	0.0000000			HF:4-HC:2	-4.063166e+00	-5.6484069	-2.477925891	0.0000000			HF:4-HC:2	-5.217221e+00	-7.03550235	-3.39893950	0.0000000			HF:4-HC:2	-5.217221e+00	-7.03550235	-3.39893950	0.0000000			HF:4-HC:2 -	33.9747922 -	37.0833697 -	30.8662147	0.0000000			HF:4-HC:2	-30.5373573	-39.4287590	-21.6459556	0.0000000			HF:4-HC:2	-29.5332746	-35.7431831	-23.323366023	0.0000000			HF:4-HC:2
SC:4-HC:2	-3.755392e+00	-4.81732604	-2.69345740	0.0000000			SC:4-HC:2	-4.183327e+00	-5.6012094	-2.765445053	0.0000000			SC:4-HC:2	-5.815166e+00	-7.63344753	-3.99688468	0.0000000			SC:4-HC:2	-5.815166e+00	-7.63344753	-3.99688468	0.0000000			SC:4-HC:2 -	45.9046974 -	49.0132749 -	42.7961199	0.0000000			SC:4-HC:2	-43.1905914	-52.0819930	-34.2991897	0.0000000			SC:4-HC:2	-35.0677384	-41.2776469	-28.857829842	0.0000000			SC:4-HC:2
SF:4-HC:2	-3.755392e+00	-4.81732604	-2.69345740	0.0000000			SF:4-HC:2	-4.168565e+00	-5.5864471	-2.750682702	0.0000000			SF:4-HC:2	-6.422478e+00	-8.24075930	-4.60419645	0.0000000			SF:4-HC:2	-6.422478e+00	-8.24075930	-4.60419645	0.0000000			SF:4-HC:2 -	46.8966376 -	50.0052151 -	43.7880601	0.0000000			SF:4-HC:2	-43.3074559	-52.1988576	-34.4160542	0.0000000			SF:4-HC:2	-34.6823598	-40.8922683	-28.472451240	0.0000000			SF:4-HC:2
SC:2-HF:2	-2.777357e+00	-3.83929092	-1.71542228	0.0000000			SC:2-HF:2	-2.180247e+00	-3.5981291	-0.762364669	0.0002778			SC:2-HF:2	-2.910985e+00	-4.72926611	-1.09270326	0.0001364			SC:2-HF:2	-2.910985e+00	-4.72926611	-1.09270326	0.0001364			SC:2-HF:2 -	26.9349035 -	30.0434810 -	23.8263260	0.0000000			SC:2-HF:2	-29.1313694	-38.0227711	-20.2399677	0.0000000			SC:2-HF:2	-20.8859972	-27.0959058	-14.676088668	0.0000000			SC:2-HF:2
SF:2-HF:2	-2.777357e+00	-3.83929092	-1.71542228	0.0000000			SF:2-HF:2	-2.201265e+00	-3.6191473	-0.783382919	0.0002391			SF:2-HF:2	-3.711781e+00	-5.53006289	-1.89350003	0.0000016			SF:2-HF:2	-3.711781e+00	-5.53006289	-1.89350003	0.0000016			SF:2-HF:2 -	29.5691772 -	32.6777547 -	26.4605997	0.0000000			SF:2-HF:2	-29.4764201	-38.3678218	-20.5850184	0.0000000			SF:2-HF:2	-20.3550144	-26.5649229	-14.145105825	0.0000000			SF:2-HF:2
HC:3-HF:2	-1.142850e-01	-1.17621929	0.94764935	1.0000000			HC:3-HF:2	4.018153e-01	-1.1834252	1.987055802	0.9997684			HC:3-HF:2	8.646829e-01	-0.95359849	2.68296437	0.9098812			HC:3-HF:2	8.646829e-01	-0.95359849	2.68296437	0.9098812			HC:3-HF:2	-1.2395580	-4.3481355	1.8690195	0.9766190			HC:3-HF:2	-3.5614571	-12.4528588	5.3299446	0.9764707			HC:3-HF:2	-2.7592256	-8.9691341	3.450682975	0.9459050			HC:3-HF:2
HF:3-HF:2	-9.058013e-01	-1.96773558	0.15613306	0.1642342			HF:3-HF:2	-4.517093e-01	-1.8695915	0.966172851	0.9970790			HF:3-HF:2	-2.172365e-01	-2.03551791	1.60104494	1.0000000			HF:3-HF:2	-2.172365e-01	-2.03551791	1.60104494	1.0000000			HF:3-HF:2	-8.8752866 -	11.9838641	-5.7667091	0.0000000			HF:3-HF:2	-15.9419520	-24.8333536	-7.0505503	0.0000172			HF:3-HF:2	-8.9614639	-15.1713724	-2.751555334	0.0006594			HF:3-HF:2
SC:3-HF:2	-2.777357e+00	-3.83929092	-1.71542228	0.0000000			SC:3-HF:2	-2.125185e+00	-3.5430673	-0.707302937	0.0004115			SC:3-HF:2	-3.104587e+00	-4.92286889	-1.28630604	0.0000457			SC:3-HF:2	-3.104587e+00	-4.92286889	-1.28630604	0.0000457			SC:3-HF:2 -	30.6615071 -	33.7700847 -	27.5529296	0.0000000			SC:3-HF:2	-33.0930384	-41.9844401	-24.2016367	0.0000000			SC:3-HF:2	-22.6049836	-28.8148921	-16.395075014	0.0000000			SC:3-HF:2
SF:3-HF:2	-2.777357e+00	-3.83929092	-1.71542228	0.0000000			SF:3-HF:2	-2.201265e+00	-3.6191473	-0.783382919	0.0002391			SF:3-HF:2	-3.517563e+00	-5.33584409	-1.69928123	0.0000045			SF:3-HF:2	-3.517563e+00	-5.33584409	-1.69928123	0.0000045			SF:3-HF:2 -	32.4923210 -	35.6008985 -	29.3837435	0.0000000			SF:3-HF:2	-32.8678586	-41.7592602	-23.9764569	0.0000000			SF:3-HF:2	-23.7805352	-29.9904438	-17.570626672	0.0000000			SF:3-HF:2
HC:4-HF:2	-1.252142e+00	-2.31407620	-0.19020756	0.0094967			HC:4-HF:2	-3.826892e-01	-1.8005714	1.035192945	0.9995199			HC:4-HF:2	-1.332955e+00	-3.15123647	0.48532639	0.3597191			HC:4-HF:2	-1.332955e+00	-3.15123647	0.48532639	0.3597191			HC:4-HF:2 -	19.8388284 -	23.3143237 -	16.3633331	0.0000000			HC:4-HF:2	-18.3309217	-27.2223234	-9.4395200	0.0000011			HC:4-HF:2	-17.4671907	-23.6770993	-11.257282200	0.0000000			HC:4-HF:2
HF:4-HF:2	-1.780406e+00	-2.84234065	-0.71847201	0.0000579			HF:4-HF:2	-2.080322e+00	-3.6655624	-0.495081480	0.0026713			HF:4-HF:2	-2.506525e+00	-4.32480594	-0.68824308	0.0013308			HF:4-HF:2	-2.506525e+00	-4.32480594	-0.68824308	0.0013308			HF:4-HF:2 -	22.9001648 -	26.0087423 -	19.7915873	0.0000000			HF:4-HF:2	-23.6091755	-32.5005772	-14.7177739	0.0000000			HF:4-HF:2	-21.0134138	-27.2233223	-14.803505256	0.0000000			HF:4-HF:2
SC:4-HF:2	-2.777357e+00	-3.83929092	-1.71542228	0.0000000			SC:4-HF:2	-2.200483e+00	-3.6183650	-0.782600642	0.0002405			SC:4-HF:2	-3.104470e+00	-4.92275112	-1.28618826	0.0000457			SC:4-HF:2	-3.104470e+00	-4.92275112	-1.28618826	0.0000457			SC:4-HF:2 -	34.8300700 -	37.9386475 -	31.7214925	0.0000000			SC:4-HF:2	-36.2624096	-45.1538113	-27.3710079	0.0000000			SC:4-HF:2	-26.5478776	-32.7577862	-20.337969074	0.0000000			SC:4-HF:2
SF:4-HF:2	-2.777357e+00	-3.83929092	-1.71542228	0.0000000			SF:4-HF:2	-2.185720e+00	-3.6036027	-0.767838291	0.0002672			SF:4-HF:2	-3.711781e+00	-5.53006289	-1.89350003	0.0000016			SF:4-HF:2	-3.711781e+00	-5.53006289	-1.89350003	0.0000016			SF:4-HF:2 -	35.8220102 -	38.9305877 -	32.7134327	0.0000000			SF:4-HF:2	-36.3792741	-45.2706758	-27.4878724	0.0000000			SF:4-HF:2	-26.1624990	-32.3724076	-19.952590472	0.0000000			SF:4-HF:2
SF:2-SC:2	1.110223e-15	-1.06193432	1.06193432	1.0000000			SF:2-SC:2	-2.101825e-02	-1.4389004	1.396863944	1.0000000			SF:2-SC:2	-8.007968e-01	-2.61907820	1.01748465	0.9480359			SF:2-SC:2	-8.007968e-01	-2.61907820	1.01748465	0.9480359			SF:2-SC:2	-2.6342737	-5.7428512	0.4743038	0.1699997			SF:2-SC:2	-0.3450507	-9.2364524	8.5463510	1.0000000			SF:2-SC:2	0.5309828	-5.6789257	6.740891385	1.0000000			SF:2-SC:2
HC:3-SC:2	2.663072e+00	1.60113731	3.72500595	0.0000000			HC:3-SC:2	2.582062e+00	0.9968217	4.167302665	0.0001105			HC:3-SC:2	3.775668e+00	1.95738620	5.59394905	0.0000011			HC:3-SC:2	3.775668e+00	1.95738620	5.59394905	0.0000011			HC:3-SC:2	25.6953455	22.5867680	28.8039230	0.0000000			HC:3-SC:2	25.5699123	16.6785106	34.4613140	0.0000000			HC:3-SC:2	18.1267716	11.9168631	24.336680185	0.0000000			HC:3-SC:2
HF:3-SC:2	1.871555e+00	0.80962102	2.93348966	0.0000237			HF:3-SC:2	1.728538e+00	0.3106553	3.146419714	0.0066533			HF:3-SC:2	2.693748e+00	0.87546677	4.51202962	0.0004655			HF:3-SC:2	2.693748e+00	0.87546677	4.51202962	0.0004655			HF:3-SC:2	18.0596169	14.9510394	21.1681944	0.0000000			HF:3-SC:2	13.1894174	4.2980158	22.0808191	0.0004341			HF:3-SC:2	11.9245333	5.7146248	18.134441877	0.0000046			HF:3-SC:2
SC:3-SC:2	-5.551115e-16	-1.06193432	1.06193432	1.0000000			SC:3-SC:2	5.506173e-02	-1.3628205	1.472943926	1.0000000			SC:3-SC:2	-1.936028e-01	-2.01188421	1.62467865	1.0000000			SC:3-SC:2	-1.936028e-01	-2.01188421	1.62467865	1.0000000			SC:3-SC:2	-3.7266036	-6.8351811	-0.6180261	0.0079581			SC:3-SC:2	-3.9616690	-12.8530707	4.9297327	0.9447651			SC:3-SC:2	-1.7189863	-7.9288949	4.490922196	0.9994223			SC:3-SC:2
SF:3-SC:2	6.106227e-16	-1.06193432	1.06193432	1.0000000			SF:3-SC:2	-2.101825e-02	-1.4389004	1.396863944	1.0000000			SF:3-SC:2	-6.065780e-01	-2.42485940	1.21170345	0.9955375			SF:3-SC:2	-6.065780e-01	-2.42485940	1.21170345	0.9955375			SF:3-SC:2	-5.5574175	-8.6659950	-2.4488400	0.0000201			SF:3-SC:2	-3.7364892	-12.6278908	5.1549125	0.9649726			SF:3-SC:2	-2.8945380	-9.1044465	3.315370538	0.9233340			SF:3-SC:2
HC:4-SC:2	1.525215e+00	0.46328040	2.58714903	0.0007077			HC:4-SC:2	1.797558e+00	0.3796754	3.215439807	0.0041423			HC:4-SC:2	1.578030e+00	-0.24025178	3.39631107	0.1461750			HC:4-SC:2	1.578030e+00	-0.24025178	3.39631107	0.1461750			HC:4-SC:2	7.0960751	3.6205798	10.5715704	0.0000016			HC:4-SC:2	10.8004477	1.9090460	19.6918494	0.0067020			HC:4-SC:2	3.4188065	-2.7911021	9.628715010	0.7856868			HC:4-SC:2
HF:4-SC:2	9.969503e-01	-0.06498405	2.05888459	0.0840195			HF:4-SC:2	9.992490e-02	-1.4853156	1.685165383	1.0000000			HF:4-SC:2	4.044602e-01	-1.41382125	2.22274160	0.9999552			HF:4-SC:2	4.044602e-01	-1.41382125	2.22274160	0.9999552			HF:4-SC:2	4.0347387	0.9261612	7.1433162	0.0029958			HF:4-SC:2	5.5221939	-3.3692078	14.4135955	0.6243649			HF:4-SC:2	-0.1274166	-6.3373251	6.082491955	1.0000000			HF:4-SC:2
SC:4-SC:2	1.498801e-15	-1.06193432	1.06193432	1.0000000			SC:4-SC:2	-2.023597e-02	-1.4381182	1.397646221	1.0000000			SC:4-SC:2	-1.934850e-01	-2.01176643	1.62479642	1.0000000			SC:4-SC:2	-1.934850e-01	-2.01176643	1.62479642	1.0000000			SC:4-SC:2	-7.8951665 -	11.0037440	-4.7865890	0.0000000			SC:4-SC:2	-7.1310402	-16.0224419	1.7603615	0.2352800			SC:4-SC:2	-5.6618804	-11.8717889	0.548028136	0.1046096			SC:4-SC:2
SF:4-SC:2	1.276756e-15	-1.06193432	1.06193432	1.0000000			SF:4-SC:2	-5.473622e-03	-1.4233558	1.412408572	1.0000000			SF:4-SC:2	-8.007968e-01	-2.61907820	1.01748465	0.9480359			SF:4-SC:2	-8.007968e-01	-2.61907820	1.01748465	0.9480359			SF:4-SC:2	-8.8871067 -	11.9956842	-5.7785292	0.0000000			SF:4-SC:2	-7.2479047	-16.1393064	1.6434970	0.2151010			SF:4-SC:2	-5.2765018	-11.4864103	0.933406738	0.1682383			SF:4-SC:2
HC:3-SF:2	2.663072e+00	1.60113731	3.72500595	0.0000000			HC:3-SF:2	2.603080e+00	1.0178399	4.188320915	0.0000966			HC:3-SF:2	4.576464e+00	2.75818297	6.39474583	0.0000000			HC:3-SF:2	4.576464e+00	2.75818297	6.39474583	0.0000000			HC:3-SF:2	28.3296192	25.2210417	31.4381967	0.0000000			HC:3-SF:2	25.9149631	17.0235614	34.8063647	0.0000000			HC:3-SF:2	17.5957888	11.3858803	23.805697342	0.0000000			HC:3-SF:2
HF:3-SF:2	1.871555e+00	0.80962102	2.93348966	0.0000237			HF:3-SF:2	1.749556e+00	0.3316736	3.167437964	0.0057633			HF:3-SF:2	3.494545e+00	1.67626355	5.31282640	0.0000052			HF:3-SF:2	3.494545e+00	1.67626355	5.31282640	0.0000052			HF:3-SF:2	20.6938906	17.5853131	23.8024681	0.0000000			HF:3-SF:2	13.5344682	4.6430665	22.4258699	0.0002898			HF:3-SF:2	11.3935505	5.1836419	17.603459034	0.0000112			HF:3-SF:2
SC:3-SF:2	-1.665335e-15	-1.06193432	1.06193432	1.0000000			SC:3-SF:2	7.607998e-02	-1.3418022	1.493962176	1.0000000			SC:3-SF:2	6.071940e-01	-1.21108743	2.42547542	0.9954919			SC:3-SF:2	6.071940e-01	-1.21108743	2.42547542	0.9954919			SC:3-SF:2	-1.0923300	-4.2009075	2.0162475	0.9925692			SC:3-SF:2	-3.6166182	-12.5080199	5.2747834	0.9732092			SC:3-SF:2	-2.2499692	-8.4598777	3.959939353	0.9904281			SC:3-SF:2
SF:3-SF:2	-4.996004e-16	-1.06193432	1.06193432	1.0000000			SF:3-SF:2	-3.885781e-16	-1.4178822	1.417882194	1.0000000			SF:3-SF:2	1.942188e-01	-1.62406263	2.01250023	1.0000000			SF:3-SF:2	1.942188e-01	-1.62406263	2.01250023	1.0000000			SF:3-SF:2	-2.9231438	-6.0317213	0.1854337	0.0827082			SF:3-SF:2	-3.3914384	-12.2828401	5.4999633	0.9846555			SF:3-SF:2	-3.4255208	-9.6354294	2.784387695	0.7834529			SF:3-SF:2
HC:4-SF:2	1.525215e+00	0.46328040	2.58714903	0.0007077			HC:4-SF:2	1.818576e+00	0.4006937	3.236458057	0.0035812			HC:4-SF:2	2.378826e+00	0.56054499	4.19710785	0.0027013			HC:4-SF:2	2.378826e+00	0.56054499	4.19710785	0.0027013			HC:4-SF:2	9.7303488	6.2548534	13.2058441	0.0000000			HC:4-SF:2	11.1454984	2.2540967	20.0369001	0.0045601			HC:4-SF:2	2.8878236	-3.3220849	9.097732167	0.9245797			HC:4-SF:2
HF:4-SF:2	9.969503e-01	-0.06498405	2.05888459	0.0840195			HF:4-SF:2	1.209431e-01	-1.4642973	1.706183633	1.0000000			HF:4-SF:2	1.205257e+00	-0.61302448	3.02353838	0.5189715			HF:4-SF:2	1.205257e+00	-0.61302448	3.02353838	0.5189715			HF:4-SF:2	6.6690123	3.5604348	9.7775898	0.0000006			HF:4-SF:2	5.8672446	-3.0241571	14.7586463	0.5296680			HF:4-SF:2	-0.6583994	-6.8683080	5.551509112	1.0000000			HF:4-SF:2
SC:4-SF:2	3.885781e-16	-1.06193432	1.06193432	1.0000000			SC:4-SF:2	7.822769e-04	-1.4170999	1.418664471	1.0000000			SC:4-SF:2	6.073118e-01	-1.21096966	2.42559320	0.9954831			SC:4-SF:2	6.073118e-01	-1.21096966	2.42559320	0.9954831			SC:4-SF:2	-5.2608929	-8.3694704	-2.1523153	0.0000533			SC:4-SF:2	-6.7859894	-15.6773911	2.1054122	0.3025302			SC:4-SF:2	-6.1928632	-12.4027718	0.017045293	0.0512102			SC:4-SF:2
SF:4-SF:2	1.665335e-16	-1.06193432	1.06193432	1.0000000			SF:4-SF:2	1.554463e-02	-1.4023376	1.433426822	1.0000000			SF:4-SF:2	1.887379e-15	-1.81828143	1.81828143	1.0000000			SF:4-SF:2	1.887379e-15	-1.81828143	1.81828143	1.0000000			SF:4-SF:2	-6.2528330	-9.3614105	-3.1442555	0.0000021			SF:4-SF:2	-6.9028540	-15.7942557	1.9885477	0.2784775			SF:4-SF:2	-5.8074846	-12.0173932	0.402423896	0.0865461			SF:4-SF:2
HF:3-HC:3	-7.915163e-01	-1.85345061	0.27041803	0.3372318			HF:3-HC:3	-8.535247e-01	-2.4387651	0.731715824	0.8035861			HF:3-HC:3	-1.081919e+00	-2.90020085	0.73636200	0.6831802			HF:3-HC:3	-1.081919e+00	-2.90020085	0.73636200	0.6831802			HF:3-HC:3	-7.6357286	-10.7443061	-4.5271511	0.0000000			HF:3-HC:3	-12.3804949	-21.2718966	-3.4890932	0.0011128			HF:3-HC:3	-6.2022383	-12.4121469	0.007670234	0.0505413			HF:3-HC:3
SC:3-HC:3	-2.663072e+00	-3.72500595	-1.60113731	0.0000000			SC:3-HC:3	-2.527000e+00	-4.1122409	-0.941759964	0.0001570			SC:3-HC:3	-3.969270e+00	-5.78755183	-2.15098898	0.0000004			SC:3-HC:3	-3.969270e+00	-5.78755183	-2.15098898	0.0000004			SC:3-HC:3	-29.4219491	-32.5305266	-26.3133716	0.0000000			SC:3-HC:3	-29.5315813	-38.4229830	-20.6401796	0.0000000			SC:3-HC:3	-19.8457580	-26.0556665	-13.635849447	0.0000000			SC:3-HC:3
SF:3-HC:3	-2.663072e+00	-3.72500595	-1.60113731	0.0000000			SF:3-HC:3	-2.603080e+00	-4.1883209	-1.017839946	0.0000966			SF:3-HC:3	-4.382246e+00	-6.20052703	-2.56396417	0.0000000			SF:3-HC:3	-4.382246e+00	-6.20052703	-2.56396417	0.0000000			SF:3-HC:3	-31.2527630	-34.3613405	-28.1441855	0.0000000			SF:3-HC:3	-29.3064015	-38.1978032	-20.4149998	0.0000000			SF:3-HC:3	-21.0213096	-27.2312182	-14.811401105	0.0000000			SF:3-HC:3
HC:4-HC:3	-1.137857e+00	-2.19979123	-0.07592259	0.0263329			HC:4-HC:3	-7.845046e-01	-2.3697451	0.800735918	0.8803184			HC:4-HC:3	-2.197638e+00	-4.01591941	-0.37935655	0.0072336			HC:4-HC:3	-2.197638e+00	-4.01591941	-0.37935655	0.0072336			HC:4-HC:3	-18.5992704	-22.0747657	-15.1237751	0.0000000			HC:4-HC:3	-14.7694646	-23.6608663	-5.8780629	0.0000680			HC:4-HC:3	-14.7079652	-20.9178737	-8.498056633	0.0000001			HC:4-HC:3
HF:4-HC:3	-1.666121e+00	-2.72805568	-0.60418704	0.0001780			HF:4-HC:3	-2.482137e+00	-4.2186812	-0.745593337	0.0008295			HF:4-HC:3	-3.371207e+00	-5.18948888	-1.55292602	0.0000102			HF:4-HC:3	-3.371207e+00	-5.18948888	-1.55292602	0.0000102			HF:4-HC:3	-21.6606068	-24.7691843	-18.5520293	0.0000000			HF:4-HC:3	-20.0477185	-28.9391201	-11.1563168	0.0000002			HF:4-HC:3	-18.2541882	-24.4640968	-12.044279688	0.0000000			HF:4-HC:3
SC:4-HC:3	-2.663072e+00	-3.72500595	-1.60113731	0.0000000			SC:4-HC:3	-2.602298e+00	-4.1875386	-1.017057669	0.0000971			SC:4-HC:3	-3.969153e+00	-5.78743406	-2.15087120	0.0000004			SC:4-HC:3	-3.969153e+00	-5.78743406	-2.15087120	0.0000004			SC:4-HC:3	-33.5905120	-36.6990895	-30.4819345	0.0000000			SC:4-HC:3	-32.7009525	-41.5923542	-23.8095508	0.0000000			SC:4-HC:3	-23.7886520	-29.9985606	-17.578743507	0.0000000			SC:4-HC:3
SF:4-HC:3	-2.663072e+00	-3.72500595	-1.60113731	0.0000000			SF:4-HC:3	-2.587536e+00	-4.1727763	-1.002295318	0.0001067			SF:4-HC:3	-4.576464e+00	-6.39474583	-2.75818297	0.0000000			SF:4-HC:3	-4.576464e+00	-6.39474583	-2.75818297	0.0000000			SF:4-HC:3	-34.5824522	-37.6910297	-31.4738747	0.0000000			SF:4-HC:3	-32.8178170	-41.7092187	-23.9264153	0.0000000			SF:4-HC:3	-23.4032734	-29.6131820	-17.193364905	0.0000000			SF:4-HC:3
SC:3-HF:3	-1.871555e+00	-2.93348966	-0.80962102	0.0000237			SC:3-HF:3	-1.673476e+00	-3.0913580	-0.255593594	0.0096601			SC:3-HF:3	-2.887351e+00	-4.70563240	-1.06906955	0.0001559			SC:3-HF:3	-2.887351e+00	-4.70563240	-1.06906955	0.0001559			SC:3-HF:3	-21.7862206	-24.8947981	-18.6776431	0.0000000			SC:3-HF:3	-17.1510864	-26.0424881	-8.2596847	0.0000042			SC:3-HF:3	-13.6435197	-19.8534282	-7.433611138	0.0000003			SC:3-HF:3
SF:3-HF:3	-1.871555e+00	-2.93348966	-0.80962102	0.0000237			SF:3-HF:3	-1.749556e+00	-3.1674380	-0.331673576	0.0057633			SF:3-HF:3	-3.300326e+00	-5.11860760	-1.48204475	0.0000152			SF:3-HF:3	-3.300326e+00	-5.11860760	-1.48204475	0.0000152			SF:3-HF:3	-23.6170344	-26.7256119	-20.5084569	0.0000000			SF:3-HF:3	-16.9259066	-25.8173083	-8.0345049	0.0000055			SF:3-HF:3	-14.8190713	-21.0289799	-8.609162796	0.0000000			SF:3-HF:3
HC:4-HF:3	-3.463406e-01	-1.40827494	0.71559369	0.9965959			HC:4-HF:3	6.902009e-02	-1.3488621	1.486902287	1.0000000			HC:4-HF:3	-1.115719e+00	-2.93399998	0.70256287	0.6387621			HC:4-HF:3	-1.115719e+00	-2.93399998	0.70256287	0.6387621			HC:4-HF:3	-10.9635418	-14.4390371	-7.4880465	0.0000000			HC:4-HF:3	-2.3889697	-11.2803714	6.5024319	0.9995893			HC:4-HF:3	-8.5057269	-14.7156354	-2.295818324	0.0014052			HC:4-HF:3
HF:4-HF:3	-8.746051e-01	-1.93653939	0.18732925	0.2028363			HF:4-HF:3	-1.628613e+00	-3.2138531	-0.043372137	0.0394120			HF:4-HF:3	-2.289288e+00	-4.10756945	-0.47100660	0.0044102			HF:4-HF:3	-2.289288e+00	-4.10756945	-0.47100660	0.0044102			HF:4-HF:3	-14.0248782	-17.1334558	-10.9163007	0.0000000			HF:4-HF:3	-7.6672236	-16.5586253	1.2241781	0.1532452			HF:4-HF:3	-12.0519499	-18.2618585	-5.842041380	0.0000038			HF:4-HF:3
SC:4-HF:3	-1.871555e+00	-2.93348966	-0.80962102	0.0000237			SC:4-HF:3	-1.748773e+00	-3.1666557	-0.330891299	0.0057943			SC:4-HF:3	-2.887233e+00	-4.70551463	-1.06895178	0.0001560			SC:4-HF:3	-2.887233e+00	-4.70551463	-1.06895178	0.0001560			SC:4-HF:3	-25.9547834	-29.0633609	-22.8462059	0.0000000			SC:4-HF:3	-20.3204576	-29.2118593	-11.4290559	0.0000001			SC:4-HF:3	-17.5864137	-23.7963223	-11.376505199	0.0000000			SC:4-HF:3
SF:4-HF:3	-1.871555e+00	-2.93348966	-0.80962102	0.0000237			SF:4-HF:3	-1.734011e+00	-3.1518933	-0.316128948	0.0064095			SF:4-HF:3	-3.494545e+00	-5.31282640	-1.67626355	0.0000052			SF:4-HF:3	-3.494545e+00	-5.31282640	-1.67626355	0.0000052			SF:4-HF:3	-26.9467236	-30.0553011	-23.8381461	0.0000000			SF:4-HF:3	-20.4373221	-29.3287238	-11.5459205	0.0000001			SF:4-HF:3	-17.2010351	-23.4109437	-10.991126596	0.0000000			SF:4-HF:3
SF:3-SC:3	1.165734e-15	-1.06193432	1.06193432	1.0000000			SF:3-SC:3	-7.607998e-02	-1.4939622	1.341802212	1.0000000			SF:3-SC:3	-4.129752e-01	-2.23125662	1.40530623	0.9999420			SF:3-SC:3	-4.129752e-01	-2.23125662	1.40530623	0.9999420			SF:3-SC:3	-1.8308138	-4.9393913	1.2777637	0.6973981			SF:3-SC:3	0.2251798	-8.6662219	9.1165815	1.0000000			SF:3-SC:3	-1.1755517	-7.3854602	5.034356884	0.9999947			SF:3-SC:3
HC:4-SC:3	1.525215e+00	0.46328040	2.58714903	0.0007077			HC:4-SC:3	1.742496e+00	0.3246137	3.160378076	0.0060486			HC:4-SC:3	1.771632e+00	-0.04664900	3.58991385	0.0622968			HC:4-SC:3	1.771632e+00	-0.04664900	3.58991385	0.0622968			HC:4-SC:3	10.8226787	7.3471834	14.2981740	0.0000000			HC:4-SC:3	14.7621167	5.8707150	23.6535184	0.0000686			HC:4-SC:3	5.1377928	-1.0721157	11.347701356	0.1975456			HC:4-SC:3
HF:4-SC:3	9.969503e-01	-0.06498405	2.05888459	0.0840195			HF:4-SC:3	4.486317e-02	-1.5403773	1.630103651	1.0000000			HF:4-SC:3	5.980630e-01	-1.22021847	2.41634438	0.9961298			HF:4-SC:3	5.980630e-01	-1.22021847	2.41634438	0.9961298			HF:4-SC:3	7.7613423	4.6527648	10.8699198	0.0000000			HF:4-SC:3	9.4838628	0.5924612	18.3752645	0.0275350			HF:4-SC:3	1.5915698	-4.6183388	7.801478301	0.9997632			HF:4-SC:3
SC:4-SC:3	2.053913e-15	-1.06193432	1.06193432	1.0000000			SC:4-SC:3	-7.529770e-02	-1.4931799	1.342584489	1.0000000			SC:4-SC:3	1.177757e-04	-1.81816365	1.81839920	1.0000000			SC:4-SC:3	1.177757e-04	-1.81816365	1.81839920	1.0000000			SC:4-SC:3	-4.1685629	-7.2771404	-1.0599854	0.0019448			SC:4-SC:3	-3.1693712	-12.0607729	5.7220305	0.9917989			SC:4-SC:3	-3.9428941	-10.1528026	2.267014482	0.5905294			SC:4-SC:3
SF:4-SC:3	1.831868e-15	-1.06193432	1.06193432	1.0000000			SF:4-SC:3	-6.053535e-02	-1.4784175	1.357346840	1.0000000			SF:4-SC:3	-6.071940e-01	-2.42547542	1.21108743	0.9954919			SF:4-SC:3	-6.071940e-01	-2.42547542	1.21108743	0.9954919			SF:4-SC:3	-5.1605031	-8.2690806	-2.0519256	0.0000743			SF:4-SC:3	-3.2862357	-12.1776374	5.6051660	0.9884795			SF:4-SC:3	-3.5575155	-9.7674240	2.652393085	0.7376672			SF:4-SC:3
HC:4-SF:3	1.525215e+00	0.46328040	2.58714903	0.0007077			HC:4-SF:3	1.818576e+00	0.4006937	3.236458057	0.0035812			HC:4-SF:3	2.184608e+00	0.36632619	4.00288905	0.0077556			HC:4-SF:3	2.184608e+00	0.36632619	4.00288905	0.0077556			HC:4-SF:3	12.6534926	9.1779973	16.1289879	0.0000000			HC:4-SF:3	14.5369368	5.6455352	23.4283385	0.0000894			HC:4-SF:3	6.3133445	0.1034359	12.523253014	0.0431948			HC:4-SF:3
HF:4-SF:3	9.969503e-01	-0.06498405	2.05888459	0.0840195			HF:4-SF:3	1.209431e-01	-1.4642973	1.706183633	1.0000000			HF:4-SF:3	1.011038e+00	-0.80724327	2.82931958	0.7708836			HF:4-SF:3	1.011038e+00	-0.80724327	2.82931958	0.7708836			HF:4-SF:3	9.5921561	6.4835786	12.7007337	0.0000000			HF:4-SF:3	9.2586830	0.3672813	18.1500847	0.0346623			HF:4-SF:3	2.7671214	-3.4427871	8.977029959	0.9447316			HF:4-SF:3
SC:4-SF:3	8.881784e-16	-1.06193432	1.06193432	1.0000000			SC:4-SF:3	7.822769e-04	-1.4170999	1.418664471	1.0000000			SC:4-SF:3	4.130930e-01	-1.40518845	2.23137440	0.9999418			SC:4-SF:3	4.130930e-01	-1.40518845	2.23137440	0.9999418			SC:4-SF:3	-2.3377490	-5.4463265	0.7708285	0.3216143			SC:4-SF:3	-3.3945510	-12.2859527	5.4968507	0.9845289			SC:4-SF:3	-2.7673424	-8.9772509	3.442566140	0.9446985			SC:4-SF:3
SF:4-SF:3	6.661338e-16	-1.06193432	1.06193432	1.0000000			SF:4-SF:3	1.554463e-02	-1.4023376	1.433426822	1.0000000			SF:4-SF:3	-1.942188e-01	-2.01250023	1.62406263	1.0000000			SF:4-SF:3	-1.942188e-01	-2.01250023	1.62406263	1.0000000			SF:4-SF:3	-3.3296892	-6.4382667	-0.2211117	0.0265443			SF:4-SF:3	-3.5114155	-12.4028172	5.3799861	0.9791614			SF:4-SF:3	-2.3819638	-8.5918723	3.827944742	0.9838669			SF:4-SF:3
HF:4-HC:4	-5.282644e-01	-1.59019876	0.53366987	0.8813836			HF:4-HC:4	-1.697633e+00	-3.2828732	-0.112392231	0.0267297			HF:4-HC:4	-1.173569e+00	-2.99185089	0.64471196	0.5612612			HF:4-HC:4	-1.173569e+00	-2.99185089	0.64471196	0.5612612			HF:4-HC:4	-3.0613364	-6.5368317	0.4141589	0.1325197			HF:4-HC:4	-5.2782538	-14.1696555	3.6131479	0.6900859			HF:4-HC:4	-3.5462231	-9.7561316	2.663685487	0.7417129			HF:4-HC:4
SC:4-HC:4	-1.525215e+00	-2.58714903	-0.46328040	0.0007077			SC:4-HC:4	-1.817794e+00	-3.2356758	-0.399911393	0.0036007			SC:4-HC:4	-1.771515e+00	-3.58979607	0.04676678	0.0623310			SC:4-HC:4	-1.771515e+00	-3.58979607	0.04676678	0.0623310			SC:4-HC:4	-14.9912416	-18.4667369	-11.5157463	0.0000000			SC:4-HC:4	-17.9314879	-26.8228896	-9.0400862	0.0000017			SC:4-HC:4	-9.0806869	-15.2905954	-2.870778332	0.0005404			SC:4-HC:4
SF:4-HC:4	-1.525215e+00	-2.58714903	-0.46328040	0.0007077			SF:4-HC:4	-1.803031e+00	-3.2209134	-0.385149042	0.0039884			SF:4-HC:4	-2.378826e+00	-4.19710785	-0.56054499	0.0027013			SF:4-HC:4	-2.378826e+00	-4.19710785	-0.56054499	0.0027013			SF:4-HC:4	-15.9831818	-19.4586771	-12.5076865	0.0000000			SF:4-HC:4	-18.0483524	-26.9397541	-9.1569507	0.0000015			SF:4-HC:4	-8.6953083	-14.9052168	-2.485399730	0.0010267			SF:4-HC:4
SC:4-HF:4	-9.969503e-01	-2.05888459	0.06498405	0.0840195			SC:4-HF:4	-1.201609e-01	-1.7054014	1.465079614	1.0000000			SC:4-HF:4	-5.979452e-01	-2.41622661	1.22033625	0.9961375			SC:4-HF:4	-5.979452e-01	-2.41622661	1.22033625	0.9961375			SC:4-HF:4	-11.9299052	-15.0384827	-8.8213277	0.0000000			SC:4-HF:4	-12.6532340	-21.5446357	-3.7618324	0.0008110			SC:4-HF:4	-5.5344638	-11.7443724	0.675444724	0.1229499			SC:4-HF:4
SF:4-HF:4	-9.969503e-01	-2.05888459	0.06498405	0.0840195			SF:4-HF:4	-1.053985e-01	-1.6906390	1.479841965	1.0000000			SF:4-HF:4	-1.205257e+00	-3.02353838	0.61302448	0.5189715			SF:4-HF:4	-1.205257e+00	-3.02353838	0.61302448	0.5189715			SF:4-HF:4	-12.9218454	-16.0304229	-9.8132679	0.0000000			SF:4-HF:4	-12.7700986	-21.6615002	-3.8786969	0.0007080			SF:4-HF:4	-5.1490852	-11.3589938	1.060823326	0.1950230			SF:4-HF:4
SF:4-SC:4	-2.220446e-16	-1.06193432	1.06193432	1.0000000			SF:4-SC:4	1.476235e-02	-1.4031198	1.432644545	1.0000000			SF:4-SC:4	-6.073118e-01	-2.42559320	1.21096966	0.9954831			SF:4-SC:4	-6.073118e-01	-2.42559320	1.21096966	0.9954831			SF:4-SC:4	-0.9919402	-4.1005177	2.1166373	0.9971625			SF:4-SC:4	-0.1168645	-9.0082662	8.7745372	1.0000000			SF:4-SC:4	0.3853786	-5.8245299	6.595287145	1.0000000			SF:4-SC:4
[truncated: 5 more columns]

## Sheet: POLxTime
Extracto ni dosis alteran el efecto del tiempo
	Df	Sum Sq	Mean Sq	F value	Pr(>F)
Extract:Time	2	10.4	5.19	3139	0.3707
Dose:Time	4	10.4	2.60	2062	0.35220
			ANOVA	PostHoc	diff	lwr	upr	p adj
Basal	HC	Dosis 1	<0,001	1h-0	5.33171	-0.188788	10.8522	0.0591648
				2h-0	7.41886	1.89836	12.9394	0.0095863
				3h-0	8.6049	3.0844	14.1254	0.0036558
				4h-0	17.3528	11.8323	22.8733	1.67e-05
				2h-1h	2.08715	-2.85054	7.02483	0.630581
				3h-1h	3.27319	-1.66449	8.21087	0.25162
				4h-1h	12.0211	7.0834	16.9588	0.0001341
				3h-2h	1.18604	-3.75164	6.12372	0.921794
				4h-2h	9.93394	4.99626	14.8716	0.0005872
				4h-3h	8.7479	3.81022	13.6856	0.001496
Basal	HC	Dosis 2	<0,001	1h-0	3.75539	2.38414	5.12665	5.2e-05
				2h-0	4.18411	2.81285	5.55536	2.14e-05
				3h-0	6.42248	5.05122	7.79373	6e-07
				4h-0	12.9691	11.5979	14.3404	0
				2h-1h	0.428718	-0.79777	1.65521	0.764701
				3h-1h	2.66709	1.4406	3.89357	0.0003247
				4h-1h	9.21371	7.98723	10.4402	0
				3h-2h	2.23837	1.01188	3.46486	0.0012074
				4h-2h	8.785	7.55851	10.0115	0
				4h-3h	6.54663	5.32014	7.77312	2e-07
Basal	HC	Dosis 3	<0,001	1h-0	2.66307	-0.131305	5.45745	0.0623887
				2h-0	2.60308	-0.458006	5.66417	0.101342
				3h-0	4.57646	1.78209	7.37084	0.0031506
				4h-0	8.3181	5.52372	11.1125	4.83e-05
				2h-1h	-0.0599912	-2.85437	2.73439	0.999992
				3h-1h	1.91339	-0.585973	4.41276	0.150844
				4h-1h	5.65503	3.15566	8.15439	0.0003551
				3h-2h	1.97338	-0.820992	4.76776	0.198171
				4h-2h	5.71502	2.92064	8.5094	0.000719
				4h-3h	3.74164	1.24227	6.241	0.0055298
Basal	HC	Dosis 4	0.002	1h-0	4.23017	2.25981	6.20052	0.0003583
				2h-0	2.23565	0.265301	4.20601	0.0258784
				3h-0	5.46049	3.49014	7.43084	4.72e-05
				4h-0	11.8366	9.86624	13.807	1e-07
				2h-1h	-1.99451	-3.75685	-0.232174	0.0262456
				3h-1h	1.23032	-0.532016	2.99266	0.214614
				4h-1h	7.60643	5.84409	9.36877	1.2e-06
				3h-2h	3.22484	1.4625	4.98717	0.0011844
				4h-2h	9.60094	7.83861	11.3633	2e-07
				4h-3h	6.37611	4.61377	8.13845	5.1e-06
Basal	HF	Dosis 1	<0,001	1h-0	2.77736	-0.0285579	5.58327	0.0525677
				2h-0	2.20127	-0.604649	5.00718	0.143193
				3h-0	3.71178	0.905867	6.5177	0.0105691
				4h-0	12.2327	9.42681	15.0386	1.1e-06
				2h-1h	-0.576091	-3.08578	1.93359	0.932558
				3h-1h	0.934425	-1.57526	3.44411	0.724141
				4h-1h	9.45536	6.94568	11.9651	3.6e-06
				3h-2h	1.51052	-0.99917	4.0202	0.327811
				4h-2h	10.0315	7.52177	12.5411	2.2e-06
				4h-3h	8.52094	6.01125	11.0306	8.7e-06
Basal	HF	Dosis 2	<0,001	1h-0	2.77736	-0.0285579	5.58327	0.0525677
				2h-0	2.20127	-0.604649	5.00718	0.143193
				3h-0	3.71178	0.905867	6.5177	0.0105691
				4h-0	12.2327	9.42681	15.0386	1.1e-06
				2h-1h	-0.576091	-3.08578	1.93359	0.932558
				3h-1h	0.934425	-1.57526	3.44411	0.724141
				4h-1h	9.45536	6.94568	11.9651	3.6e-06
				3h-2h	1.51052	-0.99917	4.0202	0.327811
				4h-2h	10.0315	7.52177	12.5411	2.2e-06
				4h-3h	8.52094	6.01125	11.0306	8.7e-06
Basal	HF	Dosis 3	<0,001	1h-0	1.87156	0.347618	3.39549	0.0165117
				2h-0	1.74956	0.225619	3.27349	0.0242515
				3h-0	3.49455	1.97061	5.01848	0.000215
				4h-0	8.0747	6.55077	9.59864	2e-07
				2h-1h	-0.122	-1.48505	1.24105	0.997861
				3h-1h	1.62299	0.259939	2.98604	0.019745
				4h-1h	6.20315	4.8401	7.5662	7e-07
				3h-2h	1.74499	0.381938	3.10804	0.0129026
				4h-2h	6.32515	4.9621	7.6882	6e-07
				4h-3h	4.58016	3.21711	5.94321	9.5e-06
Basal	HF	Dosis 4	<0,001	1h-0	0.99695	-3.22535	5.21925	0.918545
				2h-0	0.120943	-4.50436	4.74624	0.999981
				3h-0	1.20526	-3.01704	5.42756	0.854498
				4h-0	4.03381	-0.18849	8.25611	0.0617012
				2h-1h	-0.876007	-5.09831	3.34629	0.946726
				3h-1h	0.208307	-3.56823	3.98485	0.999636
				4h-1h	3.03686	-0.73968	6.8134	0.125977
				3h-2h	1.08431	-3.13799	5.30661	0.893962
				4h-2h	3.91287	-0.309433	8.13517	0.0706425
				4h-3h	2.82855	-0.947987	6.6051	0.162884
Basal	SC	Dosis 1	<0,001	1h-0	2.59052e-16	-1.28898	1.28898	1
				2h-0	0.0838065	-1.20517	1.37278	0.999387
				3h-0	1.17448	-0.114495	2.46346	0.0773993
				4h-0	3.49023	2.20125	4.77921	5.71e-05
				2h-1h	0.0838065	-1.06909	1.2367	0.99905
				3h-1h	1.17448	0.0215863	2.32738	0.045602
				4h-1h	3.49023	2.33733	4.64312	2.28e-05
				3h-2h	1.09068	-0.0622201	2.24357	0.0652109
				4h-2h	3.40642	2.25352	4.55932	2.79e-05
				4h-3h	2.31574	1.16285	3.46864	0.0005943
Basal	SC	Dosis 2	<0,001	1h-0	2.14643e-15	-1.47529	1.47529	1
				2h-0	0.0210182	-1.45427	1.4963	0.999999
				3h-0	0.800797	-0.67449	2.27608	0.41631
				4h-0	3.79615	2.32086	5.27144	8.62e-05
				2h-1h	0.0210182	-1.29852	1.34055	0.999998
				3h-1h	0.800797	-0.51874	2.12033	0.320976
				4h-1h	3.79615	2.47661	5.11569	3.48e-05
				3h-2h	0.779779	-0.539759	2.09932	0.343107
				4h-2h	3.77513	2.4556	5.09467	3.64e-05
				4h-3h	2.99535	1.67582	4.31489	0.0002327
Basal	SC	Dosis 3	<0,001	1h-0	8.32667e-16	-0.703743	0.703743	1
				2h-0	0.07608	-0.627663	0.779823	0.995571
				3h-0	0.607194	-0.096549	1.31094	0.0980786
				4h-0	3.36006	2.65632	4.0638	5e-07
				2h-1h	0.07608	-0.553367	0.705527	0.993227
				3h-1h	0.607194	-0.0222529	1.23664	0.0595022
				4h-1h	3.36006	2.73061	3.98951	2e-07
				3h-2h	0.531114	-0.0983329	1.16056	0.1076
				4h-2h	3.28398	2.65453	3.91343	2e-07
				4h-3h	2.75287	2.12342	3.38231	1e-06
Basal	SC	Dosis 4	<0,001	1h-0	9.62193e-16	-1.25959	1.25959	1
				2h-0	0.000782277	-1.2588	1.26037	1
				3h-0	0.607312	-0.652275	1.8669	0.520422
				4h-0	3.39844	2.13886	4.65803	5.88e-05
				2h-1h	0.000782277	-1.12583	1.12739	1
				3h-1h	0.607312	-0.519297	1.73392	0.422385
				4h-1h	3.39844	2.27183	4.52505	2.35e-05
				3h-2h	0.60653	-0.520079	1.73314	0.423517
				4h-2h	3.39766	2.27105	4.52427	2.36e-05
				4h-3h	2.79113	1.66452	3.91774	0.0001167
Basal	SF	Dosis 1	<0,001	1h-0	7.40149e-16	-0.637978	0.637978	1
				2h-0	0.0968601	-0.541118	0.734838	0.979402
				3h-0	0.312277	-0.386593	1.01115	0.540692
				4h-0	4.02165	3.32278	4.72052	8e-07
				2h-1h	0.0968601	-0.473765	0.667485	0.969375
				3h-1h	0.312277	-0.325701	0.950255	0.464197
				4h-1h	4.02165	3.38368	4.65963	4e-07
				3h-2h	0.215417	-0.422561	0.853394	0.748132
				4h-2h	3.92479	3.28682	4.56277	5e-07
				4h-3h	3.70938	3.01051	4.40825	1.6e-06
Basal	SF	Dosis 2	<0,001	1h-0	3.33067e-16	-2.02475	2.02475	1
				2h-0	-1.11022e-16	-2.02475	2.02475	1
				3h-0	-3.33067e-16	-2.02475	2.02475	1
				4h-0	4.02416	1.99941	6.04891	0.0006435
				2h-1h	-4.44089e-16	-1.81099	1.81099	1
				3h-1h	-6.66134e-16	-1.81099	1.81099	1
				4h-1h	4.02416	2.21317	5.83515	0.0002747
				3h-2h	-2.22045e-16	-1.81099	1.81099	1
				4h-2h	4.02416	2.21317	5.83515	0.0002747
				4h-3h	4.02416	2.21317	5.83515	0.0002747
Basal	SF	Dosis 3	<0,001	1h-0	-3.51571e-16	-0.598342	0.598342	1
				2h-0	-4.996e-16	-0.598342	0.598342	1
				3h-0	0.194219	-0.404124	0.792561	0.791922
				4h-0	3.23998	2.58453	3.89543	1e-06
				2h-1h	-1.4803e-16	-0.535174	0.535174	1
				3h-1h	0.194219	-0.340955	0.729392	0.723711
				4h-1h	3.23998	2.64164	3.83832	5e-07
				3h-2h	0.194219	-0.340955	0.729392	0.723711
				4h-2h	3.23998	2.64164	3.83832	5e-07
				4h-3h	3.04576	2.44742	3.6441	8e-07
Basal	SF	Dosis 4	<0,001	1h-0	-2.9606e-16	-1.16906	1.16906	1
				2h-0	0.0155446	-1.15352	1.18461	0.999999
				3h-0	-5.55111e-16	-1.16906	1.16906	1
				4h-0	3.72724	2.55818	4.8963	1.48e-05
				2h-1h	0.0155446	-1.0301	1.06119	0.999998
				3h-1h	-2.59052e-16	-1.04564	1.04564	1
				4h-1h	3.72724	2.6816	4.77288	5.8e-06
				3h-2h	-0.0155446	-1.06119	1.0301	0.999998
				4h-2h	3.7117	2.66605	4.75734	6e-06
				4h-3h	3.72724	2.6816	4.77288	5.8e-06
Apical	HC	Dosis 1	0.058	1h-0	4.76387	-18.0098	27.5375	0.945236
				2h-0	-8.44915	-31.2228	14.3245	0.708716
				3h-0	-11.7353	-34.5089	11.0383	0.443687
				4h-0	-16.401	-41.3482	8.54627	0.246582
				2h-1h	-13.213	-33.5824	7.15632	0.256269
				3h-1h	-16.4992	-36.8685	3.87014	0.122559
				4h-1h	-21.1649	-43.9385	1.60876	0.0697649
				3h-2h	-3.28618	-23.6555	17.0832	0.977838
				4h-2h	-7.95184	-30.7255	14.8218	0.748762
				4h-3h	-4.66565	-27.4393	18.108	0.948942
Apical	HC	Dosis 2	0.002	1h-0	2.30824	-4.96315	9.57962	0.818368
				2h-0	-5.5169	-12.7883	1.75448	0.161869
				3h-0	-7.96128	-15.2327	-0.6899	0.0314017
				4h-0	-6.58213	-13.8535	0.689253	0.0796984
				2h-1h	-7.82514	-14.3289	-1.32141	0.0185988
				3h-1h	-10.2695	-16.7732	-3.7658	0.0033482
				4h-1h	-8.89037	-15.3941	-2.38665	0.0086176
				3h-2h	-2.44438	-8.94811	4.05934	0.717744
				4h-2h	-1.06523	-7.56895	5.43849	0.979094
				4h-3h	1.37915	-5.12457	7.88288	0.948244
Apical	HC	Dosis 3	0.007	1h-0	7.14489	-1.34864	15.6384	0.108948
				2h-0	1.14429	-7.34923	9.63782	0.989812
				3h-0	-2.08954	-10.5831	6.40399	0.915537
				4h-0	-3.98088	-12.4744	4.51265	0.544897
				2h-1h	-6.00059	-13.5974	1.59625	0.139563
				3h-1h	-9.23442	-16.8313	-1.63758	0.0175296
				4h-1h	-11.1258	-18.7226	-3.52893	0.0055366
				3h-2h	-3.23383	-10.8307	4.36301	0.624977
				4h-2h	-5.12517	-12.722	2.47167	0.238729
				4h-3h	-1.89134	-9.48818	5.7055	0.912261
Apical	HC	Dosis 4	<0.001	1h-0	5.80875	2.12198	9.49552	0.0040258
				2h-0	3.63796	0.272419	7.00351	0.0342621
				3h-0	0.465632	-2.89991	3.83118	0.987349
				4h-0	-0.373032	-3.73858	2.99251	0.994495
				2h-1h	-2.17078	-5.53633	1.19476	0.260423
				3h-1h	-5.34312	-8.70866	-1.97757	0.0038377
				4h-1h	-6.18178	-9.54733	-2.81624	0.00149
				3h-2h	-3.17233	-6.18257	-0.162097	0.0388608
				4h-2h	-4.011	-7.02123	-1.00076	0.0110669
Apical	HF	Dosis 1	0.009	1h-0	-0.415966	-12.2582	11.4262	0.999947
				2h-0	-10.9371	-22.7793	0.905156	0.0728286
				3h-0	-12.8653	-24.7075	-1.02313	0.0327291
				4h-0	-8.69937	-20.5416	3.14284	0.181291
				2h-1h	-10.5211	-21.1131	0.0709062	0.0516743
				3h-1h	-12.4494	-23.0414	-1.85738	0.0212568
				4h-1h	-8.2834	-18.8754	2.30859	0.144889
				3h-2h	-1.92828	-12.5203	8.66371	0.969486
				4h-2h	2.23769	-8.35431	12.8297	0.948898
				4h-3h	4.16597	-6.42602	14.758	0.68557
Apical	HF	Dosis 2	0.067	1h-0	0.208673	-11.353	11.7703	0.999996
				2h-0	-3.47002	-15.0317	8.09163	0.845065
				3h-0	-7.50608	-19.0677	4.05557	0.267342
				4h-0	-8.46291	-20.0246	3.09874	0.183527
				2h-1h	-3.67869	-14.0197	6.66236	0.753853
				3h-1h	-7.71475	-18.0558	2.6263	0.17184
				4h-1h	-8.67158	-19.0126	1.66947	0.110363
				3h-2h	-4.03606	-14.3771	6.30499	0.691168
				4h-2h	-4.99289	-15.3339	5.34816	0.519213
				4h-3h	-0.956828	-11.2979	9.38422	0.997567
Apical	HF	Dosis 3	<0,001	1h-0	2.96807	-1.28978	7.22591	0.206529
				2h-0	-7.77729	-12.0351	-3.51944	0.0015464
				3h-0	-4.83287	-9.09072	-0.575017	0.0266994
				4h-0	-4.35057	-8.60842	-0.092718	0.0451438
				2h-1h	-10.7454	-13.7561	-7.7346	1.24e-05
				3h-1h	-7.80093	-10.8117	-4.79018	0.0001342
				4h-1h	-7.31863	-10.3294	-4.30788	0.000213
				3h-2h	2.94443	-0.0663285	5.95518	0.0554608
				4h-2h	3.42672	0.415971	6.43748	0.0263214
				4h-3h	0.482299	-2.52846	3.49305	0.978395
Apical	HF	Dosis 4	0.107	1h-0	-6.30788	-20.8067	8.19097	0.607373
				2h-0	-10.6956	-25.1944	3.80327	0.1787
				3h-0	-12.1359	-26.6347	2.36297	0.111188
				4h-0	-11.065	-25.5638	3.4339	0.158499
				2h-1h	-4.3877	-17.3559	8.58047	0.783967
				3h-1h	-5.828	-18.7962	7.14017	0.580553
				4h-1h	-4.75707	-17.7252	8.2111	0.734083
				3h-2h	-1.4403	-14.4085	11.5279	0.995089
				4h-2h	-0.369364	-13.3375	12.5988	0.999977
				4h-3h	1.07094	-11.8972	14.0391	0.998436
Apical	SC	Dosis 1	<0,001	1h-0	4.97081	0.967355	8.97427	0.0154833
				2h-0	-2.54567	-6.54912	1.45779	0.283443
				3h-0	1.00817	-2.99529	5.01163	0.909017
				4h-0	1.12834	-2.87511	5.1318	0.871228
				2h-1h	-7.51648	-11.0973	-3.93568	0.0004257
				3h-1h	-3.96264	-7.54344	-0.38184	0.0296527
				4h-1h	-3.84247	-7.42327	-0.261666	0.0349312
				3h-2h	3.55384	-0.0269616	7.13464	0.0518871
				4h-2h	3.67401	0.0932124	7.25481	0.0439935
				4h-3h	0.120174	-3.46063	3.70097	0.999955
Apical	SC	Dosis 2	<0,001	1h-0	2.76396	0.634368	4.89356	0.0118754
				2h-0	-3.11119	-5.24079	-0.9816	0.0056262
				3h-0	1.09811	-1.03148	3.22771	0.461494
				4h-0	0.548158	-1.58144	2.67775	0.902513
				2h-1h	-5.87516	-7.77993	-3.97039	1.95e-05
				3h-1h	-1.66585	-3.57062	0.23892	0.0926046
				4h-1h	-2.2158	-4.12057	-0.311038	0.0225293
				3h-2h	4.20931	2.30454	6.11408	0.0002867
				4h-2h	3.65935	1.75459	5.56412	0.0008286
				4h-3h	-0.549957	-2.45472	1.35481	0.861643
Apical	SC	Dosis 3	<0,001	1h-0	1.81672	-1.41646	5.04989	0.386174
				2h-0	-4.2935	-7.52668	-1.06033	0.0103209
				3h-0	2.15849	-1.07469	5.39166	0.246387
				4h-0	0.573425	-2.65975	3.8066	0.972185
				2h-1h	-6.11022	-9.00206	-3.21838	0.0004049
				3h-1h	0.341769	-2.55007	3.23361	0.993779
				4h-1h	-1.24329	-4.13513	1.64855	0.616995
				3h-2h	6.45199	3.56015	9.34383	0.0002662
				4h-2h	4.86693	1.97509	7.75877	0.002154
				4h-3h	-1.58506	-4.4769	1.30678	0.407791
Apical	SC	Dosis 4	<0,001	1h-0	1.71468	-0.425335	3.85469	0.132159
				2h-0	-3.39635	-5.53637	-1.25634	0.0032341
				3h-0	2.28212	0.142103	4.42213	0.0360905
				4h-0	3.13528	0.99527	5.2753	0.0055229
				2h-1h	-5.11103	-7.02512	-3.19694	6.39e-05
				3h-1h	0.567438	-1.34665	2.48153	0.850503
				4h-1h	1.42061	-0.493482	3.33469	0.174973
				3h-2h	5.67847	3.76438	7.59256	2.7e-05
				4h-2h	6.53164	4.61755	8.44572	8.4e-06
				4h-3h	0.853167	-1.06092	2.76725	0.58741
Apical	SF	Dosis 1	0.007	1h-0	1.78896	-1.94679	5.52472	0.526343
				2h-0	-2.75854	-6.49429	0.977212	0.17809
				3h-0	1.33227	-2.40348	5.06802	0.752278
				4h-0	1.6972	-2.03855	5.43295	0.571434
				2h-1h	-4.5475	-7.88886	-1.20615	0.0088585
				3h-1h	-0.456691	-3.79805	2.88467	0.98925
				4h-1h	-0.091767	-3.43312	3.24959	0.99998
				3h-2h	4.09081	0.749455	7.43217	0.016814
				4h-2h	4.45574	1.11438	7.79709	0.0100579
				4h-3h	0.364924	-2.97643	3.70628	0.995395
Apical	SF	Dosis 2	<0,001	1h-0	1.90136	-0.961384	4.76412	0.250194
				2h-0	-1.68457	-4.54732	1.17818	0.346682
				3h-0	3.40077	0.538024	6.26352	0.0200087
				4h-0	2.23907	-0.623683	5.10182	0.144823
				2h-1h	-3.58593	-6.14646	-1.02541	0.0073924
				3h-1h	1.49941	-1.06111	4.05993	0.350794
				4h-1h	0.337701	-2.22282	2.89822	0.990592
				3h-2h	5.08534	2.52482	7.64586	0.0006469
				4h-2h	3.92364	1.36312	6.48416	0.0041011
				4h-3h	-1.16171	-3.72223	1.39881	0.572572
Apical	SF	Dosis 3	<0,001	1h-0	1.7582	-0.220238	3.73664	0.0864256
				2h-0	-2.29603	-4.27447	-0.317588	0.0228325
				3h-0	2.75523	0.776794	4.73367	0.0076616
				4h-0	3.60047	1.62204	5.57891	0.0012326
				2h-1h	-4.05423	-5.8238	-2.28466	0.0002165
				3h-1h	0.997032	-0.772539	2.7666	0.383817
				4h-1h	1.84227	0.0727028	3.61184	0.0408589
				3h-2h	5.05126	3.28169	6.82083	3.71e-05
				4h-2h	5.8965	4.12693	7.66607	1.02e-05
				4h-3h	0.845241	-0.924329	2.61481	0.528561
Apical	SF	Dosis 4	<0,001	1h-0	-1.44263	-4.88799	2.00272	0.638053
				2h-0	-5.67859	-9.12394	-2.23324	0.0024926
				3h-0	0.502122	-2.94323	3.94747	0.986358
				4h-0	1.1823	-2.26305	4.62766	0.775751
				2h-1h	-4.23596	-7.31757	-1.15434	0.0083211
				3h-1h	1.94476	-1.13686	5.02637	0.289393
				4h-1h	2.62494	-0.456677	5.70656	0.10348
				3h-2h	6.18071	3.0991	9.26233	0.000601
				4h-2h	6.8609	3.77928	9.94251	0.0002706
				4h-3h	0.680182	-2.40143	3.7618	0.940781

## Sheet: PLAxExtract
			ANOVA	PostHoc	diff	lwr	upr	p adj
Basal	Dosis 1	Tiempo 1h	<0,001	HF-HC	-2.10241	-2.82363	-1.38119	0.00012
				SC-HC	-2.10241	-2.82363	-1.38119	0.00012
				SF-HC	-0.88651	-1.60773	-0.165293	0.0192967
				SC-HF	2.59052e-16	-0.645076	0.645076	1
				SF-HF	1.2159	0.570824	1.86098	0.0018478
				SF-SC	1.2159	0.570824	1.86098	0.0018478
Basal	Dosis 1	Tiempo 2h	<0,001	HF-HC	-1.26532	-1.59844	-0.932202	5.03e-05
				SC-HC	-1.58079	-1.88488	-1.27669	7.2e-06
				SF-HC	-1.58079	-1.88488	-1.27669	7.2e-06
				SC-HF	-0.315467	-0.619561	-0.0113732	0.0431005
				SF-HF	-0.315467	-0.619561	-0.0113732	0.0431005
				SF-SC	-3.33067e-16	-0.27199	0.27199	1
Basal	Dosis 1	Tiempo 3h	0.038	HF-HC	-5.90174	-12.2483	0.444788	0.0663457
				SC-HC	-5.90174	-11.6953	-0.108179	0.0464169
				SF-HC	-5.72504	-11.5186	0.06852	0.0524232
				SC-HF	3.9968e-15	-5.79356	5.79356	1
				SF-HF	0.176699	-5.61686	5.97026	0.99953
				SF-SC	0.176699	-5.00522	5.35861	0.999344
Basal	Dosis 1	Tiempo 4h	<0,001	HF-HC	-6.83975	-9.49803	-4.18146	0.0002689
				SC-HC	-8.0275	-10.4051	-5.64986	4.57e-05
				SF-HC	-7.53004	-9.90768	-5.1524	6.97e-05
				SC-HF	-1.18775	-3.84603	1.47053	0.495916
				SF-HF	-0.690297	-3.34858	1.96798	0.825086
				SF-SC	0.497453	-1.88019	2.87509	0.896786
Basal	Dosis 2	Tiempo 1h	0.111	HF-HC	0.937709	-0.405728	2.28115	0.173847
				SC-HC	4.07082e-16	-1.20161	1.20161	1
				SF-HC	0.709556	-0.63388	2.05299	0.346616
				SC-HF	-0.937709	-2.28115	0.405728	0.173847
				SF-HF	-0.228152	-1.69981	1.24351	0.946834
				SF-SC	0.709556	-0.63388	2.05299	0.346616
Basal	Dosis 2	Tiempo 2h	<0,001	HF-HC	0.912537	-0.0478819	1.87296	0.061109
				SC-HC	-1.44483	-2.32157	-0.568095	0.0050621
				SF-HC	-1.11673	-1.99347	-0.239991	0.0176462
				SC-HF	-2.35737	-3.23411	-1.48063	0.0003631
				SF-HF	-2.02927	-2.90601	-1.15253	0.0008353
				SF-SC	0.328104	-0.456075	1.11228	0.517672
Basal	Dosis 2	Tiempo 3h	0.004	HF-HC	0.535962	-1.4235	2.49542	0.802872
				SC-HC	-2.32668	-4.28615	-0.36722	0.0228481
				SF-HC	-1.58385	-3.54331	0.375617	0.114639
				SC-HF	-2.86264	-4.61524	-1.11005	0.0042502
				SF-HF	-2.11981	-3.8724	-0.367211	0.0208878
				SF-SC	0.742837	-1.00976	2.49543	0.535463
Basal	Dosis 2	Tiempo 4h	0.001	HF-HC	3.31511	0.391066	6.23916	0.0284768
				SC-HC	-2.89149	-5.50684	-0.276147	0.0320085
				SF-HC	-1.10271	-3.71806	1.51263	0.539351
				SC-HF	-6.2066	-9.13065	-3.28256	0.0009003
				SF-HF	-4.41782	-7.34187	-1.49378	0.0065675
				SF-SC	1.78878	-0.826565	4.40413	0.195938
Basal	Dosis 3	Tiempo 1h	0.001	HF-HC	0.369677	0.165635	0.573718	0.0023353
				SC-HC	-1.38778e-17	-0.204041	0.204041	1
				SF-HC	0.0201675	-0.207958	0.248293	0.990514
				SC-HF	-0.369677	-0.573718	-0.165635	0.0023353
				SF-HF	-0.349509	-0.577635	-0.121384	0.0060816
				SF-SC	0.0201675	-0.207958	0.248293	0.990514
Basal	Dosis 3	Tiempo 2h	0.004	HF-HC	-1.06479	-1.98283	-0.146756	0.0285039
				SC-HC	-1.57262	-2.41067	-0.734568	0.0036673
				SF-HC	-1.39945	-2.31749	-0.481412	0.0092095
				SC-HF	-0.507823	-1.34587	0.330227	0.232741
				SF-HF	-0.334656	-1.25269	0.583382	0.577265
				SF-SC	0.173167	-0.664883	1.01122	0.868069
Basal	Dosis 3	Tiempo 3h	0.023	HF-HC	-2.39523	-6.40741	1.61695	0.241286
				SC-HC	-4.72847	-8.39107	-1.06587	0.0185448
				SF-HC	-3.66133	-7.6735	0.350853	0.0692054
				SC-HF	-2.33324	-5.99584	1.32936	0.205334
				SF-HF	-1.26609	-5.27827	2.74608	0.671248
				SF-SC	1.06715	-2.59546	4.72975	0.718005
Basal	Dosis 3	Tiempo 4h	0.018	HF-HC	-2.31678	-5.88487	1.25132	0.238105
				SC-HC	-4.77226	-8.34036	-1.20417	0.0114454
				SF-HC	-2.17231	-5.74041	1.39579	0.281708
				SC-HF	-2.45549	-6.02359	1.11261	0.20175
				SF-HF	0.144469	-3.42363	3.71257	0.999154
				SF-SC	2.59996	-0.96814	6.16806	0.169183
Basal	Dosis 4	Tiempo 1h	0.011	HF-HC	0.755566	0.166791	1.34434	0.0155581
				SC-HC	-2.03541e-16	-0.526616	0.526616	1
				SF-HC	-1.75785e-16	-0.526616	0.526616	1
				SC-HF	-0.755566	-1.34434	-0.166791	0.0155581
				SF-HF	-0.755566	-1.34434	-0.166791	0.0155581
				SF-SC	2.77556e-17	-0.526616	0.526616	1
Basal	Dosis 4	Tiempo 2h	0.004	HF-HC	1.2494	0.561486	1.9373	0.0042501
				SC-HC	7.40149e-17	-0.615285	0.615285	1
				SF-HC	0.0407013	-0.829443	0.910845	0.997928
				SC-HF	-1.2494	-1.9373	-0.561486	0.0042501
				SF-HF	-1.20869	-2.13162	-0.285766	0.0174858
				SF-SC	0.0407013	-0.829443	0.910845	0.997928
Basal	Dosis 4	Tiempo 3h	0.01	HF-HC	-1.6206	-3.96544	0.724236	0.16508
				SC-HC	-3.27587	-5.4164	-1.13533	0.0090544
				SF-HC	-2.79313	-5.13797	-0.448288	0.0256583
				SC-HF	-1.65526	-3.7958	0.485274	0.118829
				SF-HF	-1.17252	-3.51736	1.17232	0.354076
				SF-SC	0.482738	-1.6578	2.62327	0.837753
Basal	Dosis 4	Tiempo 4h	0.024	HF-HC	-1.45234	-7.29915	4.39448	0.842461
				SC-HC	-6.57923	-12.426	-0.732412	0.0294939
				SF-HC	-4.28773	-10.1345	1.55908	0.158619
				SC-HF	-5.12689	-10.3564	0.102661	0.0543855
				SF-HF	-2.83539	-8.06494	2.39416	0.349789
				SF-SC	2.2915	-2.93805	7.52105	0.510618
Apical	Dosis 1	Tiempo 1h	<0,001	HF-HC	56.456	49.4021	63.5098	1e-07
				SC-HC	-3.55271e-15	-6.30915	6.30915	1
				SF-HC	26.348	20.0389	32.6572	1.11e-05
				SC-HF	-56.456	-63.5098	-49.4021	1e-07
				SF-HF	-30.1079	-37.1618	-23.0541	9.6e-06
				SF-SC	26.348	20.0389	32.6572	1.11e-05
Apical	Dosis 1	Tiempo 2h	<0,001	HF-HC	58.2883	43.9768	72.5998	5.4e-06
				SC-HC	-1.42109e-14	-14.3115	14.3115	1
				SF-HC	25.5359	11.2244	39.8474	0.0019996
				SC-HF	-58.2883	-72.5998	-43.9768	5.4e-06
				SF-HF	-32.7524	-47.0639	-18.4409	0.0003737
				SF-SC	25.5359	11.2244	39.8474	0.0019996
Apical	Dosis 1	Tiempo 3h	<0,001	HF-HC	45.9521	30.3557	61.5485	6.08e-05
				SC-HC	-5.92119e-15	-15.5964	15.5964	1
				SF-HC	38.5199	22.9235	54.1163	0.0002183
				SC-HF	-45.9521	-61.5485	-30.3557	6.08e-05
				SF-HF	-7.43218	-23.0286	8.16422	0.466724
				SF-SC	38.5199	22.9235	54.1163	0.0002183
Apical	Dosis 1	Tiempo 4h	<0,001	HF-HC	54.3636	45.4892	63.238	2e-07
				SC-HC	-2.36848e-15	-8.87441	8.87441	1
				SF-HC	35.4743	26.5999	44.3487	6.2e-06
				SC-HF	-54.3636	-63.238	-45.4892	2e-07
				SF-HF	-18.8893	-27.7637	-10.0149	0.0006172
				SF-SC	35.4743	26.5999	44.3487	6.2e-06
Apical	Dosis 2	Tiempo 1h	<0,001	HF-HC	39.8683	30.0901	49.6465	5.3e-06
				SC-HC	-1.65793e-14	-9.77823	9.77823	1
				SF-HC	25.6048	15.8266	35.3831	0.0001436
				SC-HF	-39.8683	-49.6465	-30.0901	5.3e-06
				SF-HF	-14.2635	-24.0417	-4.48523	0.0069514
				SF-SC	25.6048	15.8266	35.3831	0.0001436
Apical	Dosis 2	Tiempo 2h	<0,001	HF-HC	42.3743	28.0697	56.6788	5.84e-05
				SC-HC	1.18424e-15	-14.3046	14.3046	1
				SF-HC	30.6064	16.3019	44.911	0.0005956
				SC-HF	-42.3743	-56.6788	-28.0697	5.84e-05
				SF-HF	-11.7678	-26.0724	2.53675	0.111385
				SF-SC	30.6064	16.3019	44.911	0.0005956
Apical	Dosis 2	Tiempo 3h	<0,001	HF-HC	36.9251	29.5046	44.3457	1.2e-06
				SC-HC	-7.10543e-15	-7.42055	7.42055	1
				SF-HC	32.5469	25.1263	39.9674	3.1e-06
				SC-HF	-36.9251	-44.3457	-29.5046	1.2e-06
				SF-HF	-4.37822	-11.7988	3.04233	0.304037
				SF-SC	32.5469	25.1263	39.9674	3.1e-06
Apical	Dosis 2	Tiempo 4h	<0,001	HF-HC	41.2352	32.9902	49.4802	1.1e-06
				SC-HC	-4.73695e-15	-8.24504	8.24504	1
				SF-HC	38.048	29.8029	46.293	2.1e-06
				SC-HF	-41.2352	-49.4802	-32.9902	1.1e-06
				SF-HF	-3.18724	-11.4323	5.0578	0.622385
				SF-SC	38.048	29.8029	46.293	2.1e-06
Apical	Dosis 3	Tiempo 1h	<0,001	HF-HC	33.8111	18.7855	48.8367	0.0004204
				SC-HC	-0.979781	-16.0053	14.0458	0.996513
				SF-HC	19.6391	4.61349	34.6646	0.0130095
				SC-HF	-34.7909	-49.8164	-19.7653	0.0003443
				SF-HF	-14.172	-29.1976	0.853525	0.0646209
				SF-SC	20.6188	5.59327	35.6444	0.0099013
Apical	Dosis 3	Tiempo 2h	<0,001	HF-HC	36.8664	26.7763	46.9566	1.22e-05
				SC-HC	-7.10543e-15	-10.0901	10.0901	1
				SF-HC	25.2348	15.1447	35.3249	0.0001996
				SC-HF	-36.8664	-46.9566	-26.7763	1.22e-05
				SF-HF	-11.6317	-21.7218	-1.54152	0.0253088
				SF-SC	25.2348	15.1447	35.3249	0.0001996
Apical	Dosis 3	Tiempo 3h	<0,001	HF-HC	60.5955	53.0183	68.1727	0
				SC-HC	-1.65793e-14	-7.57721	7.57721	1
				SF-HC	27.4288	19.8516	35.006	1.31e-05
				SC-HF	-60.5955	-68.1727	-53.0183	0
				SF-HF	-33.1667	-40.7439	-25.5895	3.1e-06
				SF-SC	27.4288	19.8516	35.006	1.31e-05
Apical	Dosis 3	Tiempo 4h	<0,001	HF-HC	49.8147	39.4954	60.134	1.5e-06
				SC-HC	-8.28967e-15	-10.3193	10.3193	1
				SF-HC	33.8845	23.5652	44.2038	2.72e-05
				SC-HF	-49.8147	-60.134	-39.4954	1.5e-06
				SF-HF	-15.9302	-26.2495	-5.61094	0.0049548
				SF-SC	33.8845	23.5652	44.2038	2.72e-05
Apical	Dosis 4	Tiempo 1h	<0,001	HF-HC	31.7902	17.0869	46.4935	0.0008036
				SC-HC	-1.86383	-15.0149	11.2872	0.963537
				SF-HC	14.2831	1.13206	27.4341	0.0347274
				SC-HF	-33.654	-48.3574	-18.9507	0.0005639
				SF-HF	-17.5071	-32.2104	-2.80379	0.022545
				SF-SC	16.1469	2.99588	29.298	0.0194041
Apical	Dosis 4	Tiempo 2h	<0,001	HF-HC	23.3079	21.4232	25.1927	0
				SC-HC	-3.55271e-15	-1.88476	1.88476	1
				SF-HC	12.7795	10.8947	14.6642	1e-07
				SC-HF	-23.3079	-25.1927	-21.4232	0
				SF-HF	-10.5285	-12.4132	-8.64372	4e-07
				SF-SC	12.7795	10.8947	14.6642	1e-07
Apical	Dosis 4	Tiempo 3h	<0,001	HF-HC	28.0685	22.1249	34.0122	1.8e-06
				SC-HC	-4.73695e-15	-5.94366	5.94366	1
				SF-HC	10.556	4.61236	16.4997	0.0020606
				SC-HF	-28.0685	-34.0122	-22.1249	1.8e-06
				SF-HF	-17.5125	-23.4562	-11.5688	6.08e-05
				SF-SC	10.556	4.61236	16.4997	0.0020606
Apical	Dosis 4	Tiempo 4h	0.004	HF-HC	30.0952	19.115	41.0754	0.0001032
				SC-HC	-6.51331e-15	-10.9802	10.9802	1
				SF-HC	18.7494	7.76923	29.7297	0.0026495
				SC-HF	-30.0952	-41.0754	-19.115	0.0001032
				SF-HF	-11.3457	-22.3259	-0.3655	0.0430479
				SF-SC	18.7494	7.76923	29.7297	0.0026495

## Sheet: PLAxDose
			ANOVA	PostHoc	diff	lwr	upr	p adj
Basal	HC	Tiempo 1h	<0,001	2-1	-2.10241	-2.64878	-1.55603	1.92e-05
				3-1	-2.10241	-2.64878	-1.55603	1.92e-05
				4-1	-2.10241	-2.64878	-1.55603	1.92e-05
				3-2	0	-0.488693	0.488693	1
				4-2	2.9606e-16	-0.488693	0.488693	1
				4-3	2.9606e-16	-0.488693	0.488693	1
Basal	HC	Tiempo 2h	0.002	2-1	-0.135954	-1.11857	0.846657	0.953044
				3-1	-0.00817016	-0.990782	0.974441	0.999988
				4-1	-1.58079	-2.47779	-0.68379	0.0048655
				3-2	0.127784	-0.854827	1.1104	0.960345
				4-2	-1.44483	-2.34183	-0.547836	0.0072462
				4-3	-1.57262	-2.46962	-0.67562	0.0049796
Basal	HC	Tiempo 3h	0.578	2-1	-3.57505	-14.0809	6.9308	0.566644
				3-1	-1.17327	-11.6791	9.33259	0.965205
				4-1	-2.62587	-13.1317	7.87998	0.749928
				3-2	2.40179	-8.10406	12.9076	0.79226
				4-2	0.949183	-9.55667	11.455	0.980746
				4-3	-1.45261	-11.9585	9.05325	0.938177
Basal	HC	Tiempo 4h	0.005	2-1	-5.136	-8.24919	-2.02282	0.0040159
				3-1	-3.25523	-6.36841	-0.142048	0.0411783
				4-1	-1.44827	-4.92891	2.03237	0.549107
				3-2	1.88077	-1.23241	4.99396	0.273317
				4-2	3.68773	0.207091	7.16838	0.0388343
				4-3	1.80696	-1.67368	5.28761	0.382053
Basal	HF	Tiempo 1h	0.15	2-1	0.937709	-0.355145	2.23056	0.155103
				3-1	0.369677	-0.786686	1.52604	0.698998
				4-1	0.755566	-0.537288	2.04842	0.277427
				3-2	-0.568032	-1.86088	0.724822	0.481648
				4-2	-0.182143	-1.59839	1.23411	0.968175
				4-3	0.385889	-0.906964	1.67874	0.738037
Basal	HF	Tiempo 2h	0.012	2-1	2.0419	0.668895	3.41491	0.012841
				3-1	0.192356	-1.18065	1.56536	0.936006
				4-1	0.933928	-0.439081	2.30694	0.15407
				3-2	-1.84955	-3.22256	-0.476539	0.0182724
				4-2	-1.10798	-2.48098	0.265033	0.0963505
				4-3	0.741572	-0.631437	2.11458	0.265713
Basal	HF	Tiempo 3h	0.003	2-1	2.0419	0.668895	3.41491	0.012841
				3-1	0.192356	-1.18065	1.56536	0.936006
				4-1	0.933928	-0.439081	2.30694	0.15407
				3-2	-1.84955	-3.22256	-0.476539	0.0182724
				4-2	-1.10798	-2.48098	0.265033	0.0963505
				4-3	0.741572	-0.631437	2.11458	0.265713
Basal	HF	Tiempo 4h	0.066	2-1	5.01885	-0.866187	10.9039	0.091098
				3-1	1.26774	-4.10454	6.64002	0.84475
				4-1	3.93914	-1.43314	9.31142	0.150042
				3-2	-3.75111	-9.1234	1.62117	0.173671
				4-2	-1.07971	-6.452	4.29257	0.895161
				4-3	2.6714	-2.13371	7.47652	0.310845
Basal	SC	Tiempo 1h	NA (todo 0)	NA
Basal	SC	Tiempo 2h	NA (todo 0)	NA
Basal	SC	Tiempo 3h	NA (todo 0)	NA
Basal	SC	Tiempo 4h	NA (todo 0)	NA
Basal	SF	Tiempo 1h	0.009	2-1	-0.506343	-1.46803	0.455348	0.348841
				3-1	-1.19573	-2.15742	-0.234041	0.0197015
				4-1	-1.2159	-2.07606	-0.355737	0.0108124
				3-2	-0.689389	-1.74287	0.36409	0.20839
				4-2	-0.709556	-1.67125	0.252134	0.147189
				4-3	-0.0201675	-0.981858	0.941523	0.999847
Basal	SF	Tiempo 2h	0.372	2-1	0.328104	-0.3122	0.968409	0.337478
				3-1	0.173167	-0.542715	0.88905	0.809687
				4-1	0.0407013	-0.864826	0.946229	0.998159
				3-2	-0.154937	-0.870819	0.560945	0.85265
				4-2	-0.287403	-1.19293	0.618124	0.66771
				4-3	-0.132466	-1.09292	0.827991	0.953448
Basal	SF	Tiempo 3h	0.645	2-1	0.566138	-1.62606	2.75833	0.808687
				3-1	0.890447	-1.5605	3.3414	0.617601
				4-1	0.30604	-2.14491	2.75699	0.970696
				3-2	0.324308	-2.12664	2.77526	0.965554
				4-2	-0.260099	-2.71105	2.19085	0.981501
				4-3	-0.584407	-3.26929	2.10047	0.872186
Basal	SF	Tiempo 4h	0.538	2-1	1.29133	-3.46288	6.04553	0.820167
				3-1	2.1025	-2.6517	6.85671	0.524169
				4-1	1.79404	-2.96016	6.54825	0.638906
				3-2	0.811178	-3.94303	5.56539	0.944952
				4-2	0.502716	-4.25149	5.25692	0.985655
				4-3	-0.308462	-5.06267	4.44574	0.996564
Apical	HC	Tiempo 1h	0.53	2-1	-1.11022e-15	-4.55566	4.55566	1
				3-1	0.979781	-3.57587	5.53544	0.89857
				4-1	1.86383	-2.69183	6.41948	0.582097
				3-2	0.979781	-3.57587	5.53544	0.89857
				4-2	1.86383	-2.69183	6.41948	0.582097
				4-3	0.884046	-3.67161	5.4397	0.922341
Apical	HC	Tiempo 2h	NA (todo 0)	NA
Apical	HC	Tiempo 3h	NA (todo 0)	NA
Apical	HC	Tiempo 4h	NA (todo 0)	NA
Apical	HF	Tiempo 1h	0.115	2-1	-16.5877	-44.3715	11.1961	0.263646
				3-1	-21.6651	-49.4489	6.11873	0.123495
				4-1	-22.8019	-53.2375	7.63373	0.140354
				3-2	-5.07742	-29.928	19.7732	0.890729
				4-2	-6.21425	-33.9981	21.5696	0.863441
				4-3	-1.13683	-28.9206	26.647	0.99887
Apical	HF	Tiempo 2h	0.006	2-1	-15.9141	-37.7836	5.95545	0.169916
				3-1	-21.4219	-43.2914	0.447643	0.0548354
				4-1	-34.9804	-56.8499	-13.1109	0.0039883
				3-2	-5.50781	-27.3773	16.3617	0.849725
				4-2	-19.0663	-40.9358	2.80319	0.0892455
				4-3	-13.5585	-35.428	8.311	0.269085
Apical	HF	Tiempo 3h	<0,001	2-1	-9.02698	-22.6611	4.60711	0.22557
				3-1	14.6434	1.00934	28.2775	0.0358723
				4-1	-17.8836	-31.5177	-4.24949	0.0127571
				3-2	23.6704	10.0363	37.3045	0.002384
				4-2	-8.8566	-22.4907	4.77749	0.237814
				4-3	-32.527	-46.1611	-18.8929	0.000279
Apical	HF	Tiempo 4h	0.007	2-1	-13.1284	-29.8065	3.5497	0.130583
				3-1	-4.5489	-21.227	12.1292	0.818419
				4-1	-24.2684	-40.9465	-7.59032	0.0070529
				3-2	8.5795	-8.09859	25.2576	0.407306
				4-2	-11.14	-27.8181	5.53807	0.220022
				4-3	-19.7195	-36.3976	-3.04143	0.0222325
Apical	SC	Tiempo 1h	NA (todo 0)	NA
Apical	SC	Tiempo 2h	NA (todo 0)	NA
Apical	SC	Tiempo 3h	NA (todo 0)	NA
Apical	SC	Tiempo 4h	NA (todo 0)	NA
Apical	SF	Tiempo 1h	0.02	2-1	-0.74319	-9.60311	8.11673	0.992683
				3-1	-5.72919	-14.5891	3.13073	0.240786
				4-1	-10.2011	-19.061	-1.34118	0.025465
				3-2	-4.986	-13.8459	3.87392	0.338794
				4-2	-9.4579	-18.3178	-0.597985	0.0369345
				4-3	-4.4719	-13.3318	4.38802	0.422042
Apical	SF	Tiempo 2h	<0,001	2-1	5.07054	-0.973263	11.1143	0.103507
				3-1	-0.301106	-6.34491	5.7427	0.99843
				4-1	-12.7564	-18.8002	-6.71264	0.0006538
				3-2	-5.37165	-11.4154	0.672157	0.0826573
				4-2	-17.827	-23.8708	-11.7832	6.03e-05
				4-3	-12.4553	-18.4991	-6.41154	0.0007694
Apical	SF	Tiempo 3h	0.001	2-1	-5.97302	-20.2966	8.35056	0.568145
				3-1	-11.0911	-25.4147	3.23248	0.138272
				4-1	-27.9639	-42.2875	-13.6403	0.0011074
				3-2	-5.11808	-19.4417	9.2055	0.674838
				4-2	-21.9909	-36.3145	-7.66729	0.005122
				4-3	-16.8728	-31.1964	-2.54921	0.0226627
Apical	SF	Tiempo 4h	<0,001	2-1	2.57365	-7.2054	12.3527	0.833034
				3-1	-1.58983	-11.3689	8.18922	0.951742
				4-1	-16.7248	-26.5039	-6.9458	0.002623
				3-2	-4.16348	-13.9425	5.61557	0.552768
				4-2	-19.2985	-29.0776	-9.51945	0.0010304
				4-3	-15.135	-24.9141	-5.35597	0.0048783

## Sheet: PLA2way_Extract_Dose
BASAL - Extracts & Doses at Time = 1h								BASAL – Extracts & Doses at Time = 2h								BASAL – Extracts & Doses at Time = 3h								BASAL – Extracts & Doses at Time = 4h								APICAL - Extracts & Doses at Time = 1h								APICAL - Extracts & Doses at Time = 2h								APICAL - Extracts & Doses at Time = 3h
	Df	Sum Sq	Mean Sq	F value	Pr(>F)				Df	Sum Sq	Mean Sq	F value	Pr(>F)				Df	Sum Sq	Mean Sq	F value	Pr(>F)				Df	Sum Sq	Mean Sq	F value	Pr(>F)				Df	Sum Sq	Mean Sq	F value	Pr(>F)				Df	Sum Sq	Mean Sq	F value	Pr(>F)				Df
Extract	3	1.803	0.601	9.071	0.000255	***		Extract	3	9.486	3.162	67.18	3.09e-11	***		Extract	3	88.42	29.474	21.839	6.4e-07	***		Extract	3	193.06	64.35	35.161	8.59e-10	***		Extract	3	12228	4076	210.842	2e-16	***		Extract	3	13859	4620	245.4	2e-16	***		Extract	3
Dose	3	2.532	0.8441	12.74	2.25e-05	***		Dose	3	2.569	0.8565	18.2	3.64e-06	***		Dose	3	1.86	0.621	0.46	0.713			Dose	3	7.6	2.53	1.385	0.267117			Dose	3	275	92	4.75	0.00793	**		Dose	3	942	314	16.682	1.05e-06	***		Dose	3
Extract:Dose at Time==1	9	8.825	0.9805	14.8	2.65e-08	***		Extract:Dose at Time==2	9	7.466	0.8296	17.63	4.17e-08	***		Extract:Dose at Time==3	9	24.58	2.731	2.023	0.0834	.		Extract:Dose at Time==4	9	79.53	8.84	4.828	0.000549	***		Extract:Dose at Time==1	9	637	71	3.664	0.00343	**		Extract:Dose at Time==2	9	1461	162	8.622	2.02e-06	***		Extract:Dose at Time==3	9
Residuals	27	1.789	0.0663					Residuals	22	1.035	0.0471					Residuals	23	31.04	1.35					Residuals	29	53.08	1.83					Residuals	30	580	19					Residuals	32	602	19					Residuals	32
	diff	lwr	upr	p adj					diff	lwr	upr	p adj					diff	lwr	upr	p adj					diff	lwr	upr	p adj					diff	lwr	upr	p adj					diff	lwr	upr	p adj					diff
HF:1-HC:1	-2.10241	-2.98629	-1.21853	2e-07				HF:1-HC:1	-1.26532	-2.09852	-0.432123	0.0005967				HF:1-HC:1	-5.90174	-10.3418	-1.46164	0.0029527				HF:1-HC:1	-6.83975	-11.4561	-2.22338	0.0005171				HF:1-HC:1	56.456	41.4956	71.4163	0				HF:1-HC:1	58.2883	45.1521	71.4245	0				HF:1-HC:1	45.9521
SC:1-HC:1	-2.10241	-2.98629	-1.21853	2e-07				SC:1-HC:1	-1.58079	-2.34139	-0.820186	5.8e-06				SC:1-HC:1	-5.90174	-9.95497	-1.8485	0.0009558				SC:1-HC:1	-8.0275	-12.1565	-3.89849	5.4e-06				SC:1-HC:1	8.88178e-16	-13.3809	13.3809	1				SC:1-HC:1	1.03621e-14	-13.1362	13.1362	1				SC:1-HC:1	-1.34707e-14
SF:1-HC:1	-0.88651	-1.77039	-0.00262707	0.0487655				SF:1-HC:1	-1.58079	-2.34139	-0.820186	5.8e-06				SF:1-HC:1	-5.72504	-9.77827	-1.6718	0.0014084				SF:1-HC:1	-7.53004	-11.659	-3.40104	1.74e-05				SF:1-HC:1	26.348	12.9671	39.7289	3.7e-06				SF:1-HC:1	25.5359	12.3997	38.6721	3.6e-06				SF:1-HC:1	38.5199
HC:2-HC:1	-2.10241	-2.98629	-1.21853	2e-07				HC:2-HC:1	-0.135954	-0.969151	0.697243	0.999998				HC:2-HC:1	-3.57505	-8.01515	0.865044	0.212406				HC:2-HC:1	-5.136	-9.26501	-1.007	0.0053486				HC:2-HC:1	-3.70074e-16	-13.3809	13.3809	1				HC:2-HC:1	1.0214e-14	-13.1362	13.1362	1				HC:2-HC:1	2.2667e-15
HF:2-HC:1	-1.1647	-2.13295	-0.196456	0.0082224				HF:2-HC:1	0.776583	-0.056614	1.60978	0.084913				HF:2-HC:1	-3.03909	-7.09233	1.01414	0.301186				HF:2-HC:1	-1.82089	-6.43726	2.79547	0.977133				HF:2-HC:1	39.8683	26.4874	53.2492	0				HF:2-HC:1	42.3743	29.238	55.5105	0				HF:2-HC:1	36.9251
SC:2-HC:1	-2.10241	-2.98629	-1.21853	2e-07				SC:2-HC:1	-1.58079	-2.34139	-0.820186	5.8e-06				SC:2-HC:1	-5.90174	-9.95497	-1.8485	0.0009558				SC:2-HC:1	-8.0275	-12.1565	-3.89849	5.4e-06				SC:2-HC:1	2.22045e-15	-13.3809	13.3809	1				SC:2-HC:1	1.21384e-14	-13.1362	13.1362	1				SC:2-HC:1	-1.31099e-14
SF:2-HC:1	-1.39285	-2.3611	-0.424608	0.0008797				SF:2-HC:1	-1.25268	-2.01328	-0.492082	0.0001982				SF:2-HC:1	-5.1589	-9.21214	-1.10566	0.0048658				SF:2-HC:1	-6.23872	-10.3677	-2.10971	0.0003863				SF:2-HC:1	25.6048	12.2239	38.9858	6.4e-06				SF:2-HC:1	30.6064	17.4702	43.7427	1e-07				SF:2-HC:1	32.5469
HC:3-HC:1	-2.10241	-2.98629	-1.21853	2e-07				HC:3-HC:1	-0.00817016	-0.841367	0.825027	1				HC:3-HC:1	-1.17327	-5.61336	3.26683	0.999385				HC:3-HC:1	-3.25523	-7.38423	0.873772	0.251818				HC:3-HC:1	0.979781	-12.4011	14.3607	1				HC:3-HC:1	-6.4763e-16	-13.1362	13.1362	1				HC:3-HC:1	1.4951e-14
HF:3-HC:1	-1.73273	-2.61662	-0.84885	6.2e-06				HF:3-HC:1	-1.07296	-1.90616	-0.239767	0.0044346				HF:3-HC:1	-3.5685	-8.0086	0.871601	0.214487				HF:3-HC:1	-5.57201	-9.70101	-1.443	0.0019132				HF:3-HC:1	34.7909	21.41	48.1718	0				HF:3-HC:1	36.8664	23.7302	50.0027	0				HF:3-HC:1	60.5955
SC:3-HC:1	-2.10241	-2.98629	-1.21853	2e-07				SC:3-HC:1	-1.58079	-2.34139	-0.820186	5.8e-06				SC:3-HC:1	-5.90174	-9.95497	-1.8485	0.0009558				SC:3-HC:1	-8.0275	-12.1565	-3.89849	5.4e-06				SC:3-HC:1	2.66453e-15	-13.3809	13.3809	1				SC:3-HC:1	1.2305e-14	-13.1362	13.1362	1				SC:3-HC:1	-1.16943e-14
SF:3-HC:1	-2.08224	-3.05049	-1.114	1.1e-06				SF:3-HC:1	-1.40762	-2.24082	-0.574423	0.0001382				SF:3-HC:1	-4.83459	-9.27469	-0.394493	0.0239854				SF:3-HC:1	-5.42754	-9.55654	-1.29853	0.002696				SF:3-HC:1	20.6188	7.23792	33.9997	0.0002689				SF:3-HC:1	25.2348	12.0986	38.371	4.6e-06				SF:3-HC:1	27.4288
HC:4-HC:1	-2.10241	-2.98629	-1.21853	2e-07				HC:4-HC:1	-1.58079	-2.34139	-0.820186	5.8e-06				HC:4-HC:1	-2.62587	-7.06597	1.81423	0.652121				HC:4-HC:1	-1.44827	-6.06463	3.1681	0.997383				HC:4-HC:1	1.86383	-11.5171	15.2447	1				HC:4-HC:1	4.38168e-14	-13.1362	13.1362	1				HC:4-HC:1	4.15964e-14
HF:4-HC:1	-1.34684	-2.31509	-0.378598	0.0013879				HF:4-HC:1	-0.331393	-1.16459	0.501804	0.966191				HF:4-HC:1	-4.24648	-8.68657	0.193623	0.0707245				HF:4-HC:1	-2.90061	-7.02961	1.2284	0.41944				HF:4-HC:1	33.654	18.6937	48.6144	2e-07				HF:4-HC:1	23.3079	10.1717	36.4442	2.09e-05				HF:4-HC:1	28.0685
SC:4-HC:1	-2.10241	-2.98629	-1.21853	2e-07				SC:4-HC:1	-1.58079	-2.34139	-0.820186	5.8e-06				SC:4-HC:1	-5.90174	-9.95497	-1.8485	0.0009558				SC:4-HC:1	-8.0275	-12.1565	-3.89849	5.4e-06				SC:4-HC:1	6.21725e-15	-13.3809	13.3809	1				SC:4-HC:1	1.4803e-14	-13.1362	13.1362	1				SC:4-HC:1	-1.34707e-14
SF:4-HC:1	-2.10241	-2.98629	-1.21853	2e-07				SF:4-HC:1	-1.54009	-2.56054	-0.519633	0.0006474				SF:4-HC:1	-5.419	-9.8591	-0.978901	0.0077107				SF:4-HC:1	-5.736	-9.865	-1.607	0.0012935				SF:4-HC:1	16.1469	2.76602	29.5278	0.0074975				SF:4-HC:1	12.7795	-0.356786	25.9157	0.0631893				SF:4-HC:1	10.556
SC:1-HF:1	1.05471e-15	-0.790569	0.790569	1				SC:1-HF:1	-0.315467	-1.07607	0.445134	0.953384				SC:1-HF:1	5.55111e-17	-4.05324	4.05324	1				SC:1-HF:1	-1.18775	-5.80412	3.42862	0.999707				SC:1-HF:1	-56.456	-71.4163	-41.4956	0				SC:1-HF:1	-58.2883	-71.4245	-45.1521	0				SC:1-HF:1	-45.9521
SF:1-HF:1	1.2159	0.425331	2.00647	0.000338				SF:1-HF:1	-0.315467	-1.07607	0.445134	0.953384				SF:1-HF:1	0.176699	-3.87654	4.22993	1				SF:1-HF:1	-0.690297	-5.30666	3.92607	1				SF:1-HF:1	-30.1079	-45.0682	-15.1476	2.4e-06				SF:1-HF:1	-32.7524	-45.8886	-19.6162	0				SF:1-HF:1	-7.43218
HC:2-HF:1	1.23975e-15	-0.790569	0.790569	1				HC:2-HF:1	1.12937	0.296169	1.96256	0.0024624				HC:2-HF:1	2.32668	-2.11342	6.76678	0.801441				HC:2-HF:1	1.70374	-2.91262	6.32011	0.987253				HC:2-HF:1	-56.456	-71.4163	-41.4956	0				HC:2-HF:1	-58.2883	-71.4245	-45.1521	0				HC:2-HF:1	-45.9521
HF:2-HF:1	0.937709	0.0538259	1.82159	0.0296561				HF:2-HF:1	2.0419	1.20871	2.8751	4e-07				HF:2-HF:1	2.86265	-1.19059	6.91588	0.38616				HF:2-HF:1	5.01885	-0.0381226	10.0758	0.053315				HF:2-HF:1	-16.5877	-31.548	-1.62734	0.018906				HF:2-HF:1	-15.9141	-29.0503	-2.77782	0.0069197				HF:2-HF:1	-9.02698
SC:2-HF:1	8.25728e-16	-0.790569	0.790569	1				SC:2-HF:1	-0.315467	-1.07607	0.445134	0.953384				SC:2-HF:1	-9.37618e-16	-4.05324	4.05324	1				SC:2-HF:1	-1.18775	-5.80412	3.42862	0.999707				SC:2-HF:1	-56.456	-71.4163	-41.4956	0				SC:2-HF:1	-58.2883	-71.4245	-45.1521	0				SC:2-HF:1	-45.9521
SF:2-HF:1	0.709556	-0.174326	1.59344	0.225048				SF:2-HF:1	0.012637	-0.747964	0.773238	1				SF:2-HF:1	0.742837	-3.3104	4.79607	0.999993				SF:2-HF:1	0.60103	-4.01534	5.2174	1				SF:2-HF:1	-30.8511	-45.8114	-15.8908	1.5e-06				SF:2-HF:1	-27.6819	-40.8181	-14.5456	7e-07				SF:2-HF:1	-13.4052
HC:3-HF:1	4.16334e-16	-0.790569	0.790569	1				HC:3-HF:1	1.25715	0.423953	2.09035	0.0006496				HC:3-HF:1	4.72847	0.288374	9.16857	0.0293179				HC:3-HF:1	3.58452	-1.03185	8.20088	0.271911				HC:3-HF:1	-55.4762	-70.4365	-40.5159	0				HC:3-HF:1	-58.2883	-71.4245	-45.1521	0				HC:3-HF:1	-45.9521
HF:3-HF:1	0.369677	-0.420892	1.16025	0.910609				HF:3-HF:1	0.192356	-0.640841	1.02555	0.999857				HF:3-HF:1	2.33324	-2.10686	6.77334	0.798497				HF:3-HF:1	1.26774	-3.34863	5.8841	0.999382				HF:3-HF:1	-21.6651	-36.6254	-6.70477	0.0006863				HF:3-HF:1	-21.4219	-34.5581	-8.28562	9.34e-05				HF:3-HF:1	14.6434
SC:3-HF:1	1.02696e-15	-0.790569	0.790569	1				SC:3-HF:1	-0.315467	-1.07607	0.445134	0.953384				SC:3-HF:1	-8.88178e-16	-4.05324	4.05324	1				SC:3-HF:1	-1.18775	-5.80412	3.42862	0.999707				SC:3-HF:1	-56.456	-71.4163	-41.4956	0				SC:3-HF:1	-58.2883	-71.4245	-45.1521	0				SC:3-HF:1	-45.9521
SF:3-HF:1	0.0201675	-0.863715	0.90405	1				SF:3-HF:1	-0.1423	-0.975497	0.690897	0.999997				SF:3-HF:1	1.06715	-3.37295	5.50724	0.999792				SF:3-HF:1	1.41221	-3.20416	6.02857	0.99799				SF:3-HF:1	-35.8371	-50.7974	-20.8768	1e-07				SF:3-HF:1	-33.0535	-46.1898	-19.9173	0				SF:3-HF:1	-18.5233
HC:4-HF:1	1.78561e-15	-0.790569	0.790569	1				HC:4-HF:1	-0.315467	-1.07607	0.445134	0.953384				HC:4-HF:1	3.27587	-1.16423	7.71596	0.323333				HC:4-HF:1	5.39148	0.334501	10.4485	0.0280345				HC:4-HF:1	-54.5921	-69.5524	-39.6318	0				HC:4-HF:1	-58.2883	-71.4245	-45.1521	0				HC:4-HF:1	-45.9521
HF:4-HF:1	0.755566	-0.128317	1.63945	0.156637				HF:4-HF:1	0.933928	0.100731	1.76712	0.0185267				HF:4-HF:1	1.65526	-2.78484	6.09536	0.981249				HF:4-HF:1	3.93914	-0.677226	8.5555	0.160732				HF:4-HF:1	-22.8019	-39.1901	-6.41371	0.001215				HF:4-HF:1	-34.9804	-48.1166	-21.8441	0				HF:4-HF:1	-17.8836
SC:4-HF:1	8.88178e-16	-0.790569	0.790569	1				SC:4-HF:1	-0.315467	-1.07607	0.445134	0.953384				SC:4-HF:1	-2.22045e-16	-4.05324	4.05324	1				SC:4-HF:1	-1.18775	-5.80412	3.42862	0.999707				SC:4-HF:1	-56.456	-71.4163	-41.4956	0				SC:4-HF:1	-58.2883	-71.4245	-45.1521	0				SC:4-HF:1	-45.9521
SF:4-HF:1	6.66134e-16	-0.790569	0.790569	1				SF:4-HF:1	-0.274766	-1.29522	0.745688	0.999171				SF:4-HF:1	0.482738	-3.95736	4.92284	1				SF:4-HF:1	1.10375	-3.51262	5.72011	0.999877				SF:4-HF:1	-40.309	-55.2693	-25.3487	0				SF:4-HF:1	-45.5089	-58.6451	-32.3726	0				SF:4-HF:1	-35.3961
SF:1-SC:1	1.2159	0.425331	2.00647	0.000338				SF:1-SC:1	2.77556e-16	-0.680303	0.680303	1				SF:1-SC:1	0.176699	-3.44863	3.80202	1				SF:1-SC:1	0.497453	-3.63155	4.62646	1				SF:1-SC:1	26.348	12.9671	39.7289	3.7e-06				SF:1-SC:1	25.5359	12.3997	38.6721	3.6e-06				SF:1-SC:1	38.5199
HC:2-SC:1	1.85037e-16	-0.790569	0.790569	1				HC:2-SC:1	1.44483	0.684232	2.20543	2.41e-05				HC:2-SC:1	2.32668	-1.72655	6.37992	0.692882				HC:2-SC:1	2.89149	-1.23751	7.02049	0.424374				HC:2-SC:1	-1.25825e-15	-13.3809	13.3809	1				HC:2-SC:1	-1.4803e-16	-13.1362	13.1362	1				HC:2-SC:1	1.57374e-14
HF:2-SC:1	0.937709	0.0538259	1.82159	0.0296561				HF:2-SC:1	2.35737	1.59677	3.11797	0				HF:2-SC:1	2.86265	-0.76268	6.48797	0.235098				HF:2-SC:1	6.2066	1.59024	10.823	0.0020096				HF:2-SC:1	39.8683	26.4874	53.2492	0				HF:2-SC:1	42.3743	29.238	55.5105	0				HF:2-SC:1	36.9251
SC:2-SC:1	-2.28983e-16	-0.790569	0.790569	1				SC:2-SC:1	-8.32667e-17	-0.680303	0.680303	1				SC:2-SC:1	-9.93129e-16	-3.62532	3.62532	1				SC:2-SC:1	1.91513e-15	-4.129	4.129	1				SC:2-SC:1	1.33227e-15	-13.3809	13.3809	1				SC:2-SC:1	1.77636e-15	-13.1362	13.1362	1				SC:2-SC:1	3.60823e-16
SF:2-SC:1	0.709556	-0.174326	1.59344	0.225048				SF:2-SC:1	0.328104	-0.352198	1.00841	0.871261				SF:2-SC:1	0.742837	-2.88249	4.36816	0.99997				SF:2-SC:1	1.78878	-2.34022	5.91778	0.951352				SF:2-SC:1	25.6048	12.2239	38.9858	6.4e-06				SF:2-SC:1	30.6064	17.4702	43.7427	1e-07				SF:2-SC:1	32.5469
HC:3-SC:1	-6.38378e-16	-0.790569	0.790569	1				HC:3-SC:1	1.57262	0.812016	2.33322	6.3e-06				HC:3-SC:1	4.72847	0.675236	8.78171	0.0123307				HC:3-SC:1	4.77226	0.643262	8.90127	0.0123415				HC:3-SC:1	0.979781	-12.4011	14.3607	1				HC:3-SC:1	-1.10097e-14	-13.1362	13.1362	1				HC:3-SC:1	2.84217e-14
HF:3-SC:1	0.369677	-0.420892	1.16025	0.910609				HF:3-SC:1	0.507823	-0.252778	1.26842	0.465018				HF:3-SC:1	2.33324	-1.72	6.38648	0.68913				HF:3-SC:1	2.45549	-1.67351	6.58449	0.675959				HF:3-SC:1	34.7909	21.41	48.1718	0				HF:3-SC:1	36.8664	23.7302	50.0027	0				HF:3-SC:1	60.5955
SC:3-SC:1	-2.77556e-17	-0.790569	0.790569	1				SC:3-SC:1	3.46945e-18	-0.680303	0.680303	1				SC:3-SC:1	-9.4369e-16	-3.62532	3.62532	1				SC:3-SC:1	2.77556e-17	-4.129	4.129	1				SC:3-SC:1	1.77636e-15	-13.3809	13.3809	1				SC:3-SC:1	1.94289e-15	-13.1362	13.1362	1				SC:3-SC:1	1.77636e-15
SF:3-SC:1	0.0201675	-0.863715	0.90405	1				SF:3-SC:1	0.173167	-0.587434	0.933769	0.999879				SF:3-SC:1	1.06715	-2.98609	5.12038	0.999409				SF:3-SC:1	2.59996	-1.52904	6.72896	0.591683				SF:3-SC:1	20.6188	7.23792	33.9997	0.0002689				SF:3-SC:1	25.2348	12.0986	38.371	4.6e-06				SF:3-SC:1	27.4288
HC:4-SC:1	7.30897e-16	-0.790569	0.790569	1				HC:4-SC:1	-2.498e-16	-0.680303	0.680303	1				HC:4-SC:1	3.27587	-0.777371	7.3291	0.208178				HC:4-SC:1	6.57923	1.96286	11.1956	0.0009058				HC:4-SC:1	1.86383	-11.5171	15.2447	1				HC:4-SC:1	3.34547e-14	-13.1362	13.1362	1				HC:4-SC:1	5.50671e-14
HF:4-SC:1	0.755566	-0.128317	1.63945	0.156637				HF:4-SC:1	1.2494	0.488794	2.01	0.0002057				HF:4-SC:1	1.65526	-2.39797	5.7085	0.960647				HF:4-SC:1	5.12689	0.997886	9.25589	0.0054633				HF:4-SC:1	33.654	18.6937	48.6144	2e-07				HF:4-SC:1	23.3079	10.1717	36.4442	2.09e-05				HF:4-SC:1	28.0685
SC:4-SC:1	-1.66534e-16	-0.790569	0.790569	1				SC:4-SC:1	3.05311e-16	-0.680303	0.680303	1				SC:4-SC:1	-2.77556e-16	-3.62532	3.62532	1				SC:4-SC:1	-1.30451e-15	-4.129	4.129	1				SC:4-SC:1	5.32907e-15	-13.3809	13.3809	1				SC:4-SC:1	4.44089e-15	-13.1362	13.1362	1				SC:4-SC:1	0
SF:4-SC:1	-3.88578e-16	-0.790569	0.790569	1				SF:4-SC:1	0.0407013	-0.921392	1.00279	1				SF:4-SC:1	0.482738	-3.5705	4.53597	1				SF:4-SC:1	2.2915	-1.83751	6.4205	0.765791				SF:4-SC:1	16.1469	2.76602	29.5278	0.0074975				SF:4-SC:1	12.7795	-0.356786	25.9157	0.0631893				SF:4-SC:1	10.556
HC:2-SF:1	-1.2159	-2.00647	-0.425331	0.000338				HC:2-SF:1	1.44483	0.684232	2.20543	2.41e-05				HC:2-SF:1	2.14998	-1.90325	6.20322	0.788507				HC:2-SF:1	2.39404	-1.73496	6.52304	0.710655				HC:2-SF:1	-26.348	-39.7289	-12.9671	3.7e-06				HC:2-SF:1	-25.5359	-38.6721	-12.3997	3.6e-06				HC:2-SF:1	-38.5199
HF:2-SF:1	-0.278191	-1.16207	0.605692	0.996988				HF:2-SF:1	2.35737	1.59677	3.11797	0				HF:2-SF:1	2.68595	-0.939379	6.31127	0.317529				HF:2-SF:1	5.70915	1.09278	10.3255	0.0057299				HF:2-SF:1	13.5203	0.139352	26.9012	0.0456972				HF:2-SF:1	16.8383	3.70211	29.9746	0.0034334				HF:2-SF:1	-1.5948
SC:2-SF:1	-1.2159	-2.00647	-0.425331	0.000338				SC:2-SF:1	-3.60823e-16	-0.680303	0.680303	1				SC:2-SF:1	-0.176699	-3.80202	3.44863	1				SC:2-SF:1	-0.497453	-4.62646	3.63155	1				SC:2-SF:1	-26.348	-39.7289	-12.9671	3.7e-06				SC:2-SF:1	-25.5359	-38.6721	-12.3997	3.6e-06				SC:2-SF:1	-38.5199
SF:2-SF:1	-0.506343	-1.39023	0.37754	0.717643				SF:2-SF:1	0.328104	-0.352198	1.00841	0.871261				SF:2-SF:1	0.566138	-3.05919	4.19146	0.999999				SF:2-SF:1	1.29133	-2.83768	5.42033	0.997467				SF:2-SF:1	-0.74319	-14.1241	12.6377	1				SF:2-SF:1	5.07054	-8.0657	18.2068	0.982939				SF:2-SF:1	-5.97302
HC:3-SF:1	-1.2159	-2.00647	-0.425331	0.000338				HC:3-SF:1	1.57262	0.812016	2.33322	6.3e-06				HC:3-SF:1	4.55177	0.498537	8.60501	0.0179446				HC:3-SF:1	4.27481	0.145809	8.40381	0.0368329				HC:3-SF:1	-25.3682	-38.7492	-11.9873	7.6e-06				HC:3-SF:1	-25.5359	-38.6721	-12.3997	3.6e-06				HC:3-SF:1	-38.5199
HF:3-SF:1	-0.846223	-1.63679	-0.0556539	0.0272869				HF:3-SF:1	0.507823	-0.252778	1.26842	0.465018				HF:3-SF:1	2.15654	-1.8967	6.20978	0.785194				HF:3-SF:1	1.95804	-2.17097	6.08704	0.907123				HF:3-SF:1	8.44284	-4.93807	21.8238	0.592693				HF:3-SF:1	11.3305	-1.8057	24.4668	0.152992				HF:3-SF:1	22.0756
SC:3-SF:1	-1.2159	-2.00647	-0.425331	0.000338				SC:3-SF:1	-2.74086e-16	-0.680303	0.680303	1				SC:3-SF:1	-0.176699	-3.80202	3.44863	1				SC:3-SF:1	-0.497453	-4.62646	3.63155	1				SC:3-SF:1	-26.348	-39.7289	-12.9671	3.7e-06				SC:3-SF:1	-25.5359	-38.6721	-12.3997	3.6e-06				SC:3-SF:1	-38.5199
SF:3-SF:1	-1.19573	-2.07961	-0.311849	0.0019999				SF:3-SF:1	0.173167	-0.587434	0.933769	0.999879				SF:3-SF:1	0.890447	-3.16279	4.94368	0.999929				SF:3-SF:1	2.1025	-2.0265	6.23151	0.854246				SF:3-SF:1	-5.72919	-19.1101	7.65172	0.956914				SF:3-SF:1	-0.301106	-13.4373	12.8351	1				SF:3-SF:1	-11.0911
HC:4-SF:1	-1.2159	-2.00647	-0.425331	0.000338				HC:4-SF:1	-5.27356e-16	-0.680303	0.680303	1				HC:4-SF:1	3.09917	-0.954069	7.1524	0.275253				HC:4-SF:1	6.08177	1.46541	10.6981	0.0026195				HC:4-SF:1	-24.4842	-37.8651	-11.1033	1.46e-05				HC:4-SF:1	-25.5359	-38.6721	-12.3997	3.6e-06				HC:4-SF:1	-38.5199
HF:4-SF:1	-0.460334	-1.34422	0.423549	0.826432				HF:4-SF:1	1.2494	0.488794	2.01	0.0002057				HF:4-SF:1	1.47856	-2.57467	5.5318	0.984459				HF:4-SF:1	4.62944	0.500433	8.75844	0.0170102				HF:4-SF:1	7.30601	-7.6543	22.2663	0.890037				HF:4-SF:1	-2.22796	-15.3642	10.9083	0.999999				HF:4-SF:1	-10.4514
SC:4-SF:1	-1.2159	-2.00647	-0.425331	0.000338				SC:4-SF:1	2.77556e-17	-0.680303	0.680303	1				SC:4-SF:1	-0.176699	-3.80202	3.44863	1				SC:4-SF:1	-0.497453	-4.62646	3.63155	1				SC:4-SF:1	-26.348	-39.7289	-12.9671	3.7e-06				SC:4-SF:1	-25.5359	-38.6721	-12.3997	3.6e-06				SC:4-SF:1	-38.5199
SF:4-SF:1	-1.2159	-2.00647	-0.425331	0.000338				SF:4-SF:1	0.0407013	-0.921392	1.00279	1				SF:4-SF:1	0.30604	-3.7472	4.35928	1				SF:4-SF:1	1.79404	-2.33496	5.92305	0.950255				SF:4-SF:1	-10.2011	-23.582	3.17982	0.299575				SF:4-SF:1	-12.7564	-25.8927	0.379794	0.0641378				SF:4-SF:1	-27.9639
HF:2-HC:2	0.937709	0.0538259	1.82159	0.0296561				HF:2-HC:2	0.912537	0.0793402	1.74573	0.0229704				HF:2-HC:2	0.535962	-3.51727	4.5892	1				HF:2-HC:2	3.31511	-1.30125	7.93148	0.385294				HF:2-HC:2	39.8683	26.4874	53.2492	0				HF:2-HC:2	42.3743	29.238	55.5105	0				HF:2-HC:2	36.9251
SC:2-HC:2	-4.14021e-16	-0.790569	0.790569	1				SC:2-HC:2	-1.44483	-2.20543	-0.684232	2.41e-05				SC:2-HC:2	-2.32668	-6.37992	1.72655	0.692882				SC:2-HC:2	-2.89149	-7.02049	1.23751	0.424374				SC:2-HC:2	2.59052e-15	-13.3809	13.3809	1				SC:2-HC:2	1.92439e-15	-13.1362	13.1362	1				SC:2-HC:2	-1.53766e-14
SF:2-HC:2	0.709556	-0.174326	1.59344	0.225048				SF:2-HC:2	-1.11673	-1.87733	-0.356128	0.0009236				SF:2-HC:2	-1.58385	-5.63708	2.46939	0.972245				SF:2-HC:2	-1.10271	-5.23171	3.02629	0.99955				SF:2-HC:2	25.6048	12.2239	38.9858	6.4e-06				SF:2-HC:2	30.6064	17.4702	43.7427	1e-07				SF:2-HC:2	32.5469
HC:3-HC:2	-8.23415e-16	-0.790569	0.790569	1				HC:3-HC:2	0.127784	-0.705413	0.960981	0.999999				HC:3-HC:2	2.40179	-2.03831	6.84189	0.766641				HC:3-HC:2	1.88077	-2.24823	6.00978	0.929654				HC:3-HC:2	0.979781	-12.4011	14.3607	1				HC:3-HC:2	-1.08617e-14	-13.1362	13.1362	1				HC:3-HC:2	1.26843e-14
HF:3-HC:2	0.369677	-0.420892	1.16025	0.910609				HF:3-HC:2	-0.93701	-1.77021	-0.103813	0.0179589				HF:3-HC:2	0.00655687	-4.43354	4.44665	1				HF:3-HC:2	-0.436003	-4.56501	3.693	1				HF:3-HC:2	34.7909	21.41	48.1718	0				HF:3-HC:2	36.8664	23.7302	50.0027	0				HF:3-HC:2	60.5955
SC:3-HC:2	-2.12793e-16	-0.790569	0.790569	1				SC:3-HC:2	-1.44483	-2.20543	-0.684232	2.41e-05				SC:3-HC:2	-2.32668	-6.37992	1.72655	0.692882				SC:3-HC:2	-2.89149	-7.02049	1.23751	0.424374				SC:3-HC:2	3.03461e-15	-13.3809	13.3809	1				SC:3-HC:2	2.09092e-15	-13.1362	13.1362	1				SC:3-HC:2	-1.3961e-14
SF:3-HC:2	0.0201675	-0.863715	0.90405	1				SF:3-HC:2	-1.27167	-2.10486	-0.438469	0.0005587				SF:3-HC:2	-1.25954	-5.69964	3.18056	0.998664				SF:3-HC:2	-0.291534	-4.42054	3.83747	1				SF:3-HC:2	20.6188	7.23792	33.9997	0.0002689				SF:3-HC:2	25.2348	12.0986	38.371	4.6e-06				SF:3-HC:2	27.4288
HC:4-HC:2	5.4586e-16	-0.790569	0.790569	1				HC:4-HC:2	-1.44483	-2.20543	-0.684232	2.41e-05				HC:4-HC:2	0.949183	-3.49091	5.38928	0.999949				HC:4-HC:2	3.68773	-0.928631	8.3041	0.235042				HC:4-HC:2	1.86383	-11.5171	15.2447	1				HC:4-HC:2	3.36028e-14	-13.1362	13.1362	1				HC:4-HC:2	3.93297e-14
HF:4-HC:2	0.755566	-0.128317	1.63945	0.156637				HF:4-HC:2	-0.195438	-1.02864	0.637758	0.999827				HF:4-HC:2	-0.67142	-5.11152	3.76868	0.999999				HF:4-HC:2	2.2354	-1.89361	6.3644	0.794055				HF:4-HC:2	33.654	18.6937	48.6144	2e-07				HF:4-HC:2	23.3079	10.1717	36.4442	2.09e-05				HF:4-HC:2	28.0685
SC:4-HC:2	-3.51571e-16	-0.790569	0.790569	1				SC:4-HC:2	-1.44483	-2.20543	-0.684232	2.41e-05				SC:4-HC:2	-2.32668	-6.37992	1.72655	0.692882				SC:4-HC:2	-2.89149	-7.02049	1.23751	0.424374				SC:4-HC:2	6.58732e-15	-13.3809	13.3809	1				SC:4-HC:2	4.58892e-15	-13.1362	13.1362	1				SC:4-HC:2	-1.57374e-14
SF:4-HC:2	-5.73615e-16	-0.790569	0.790569	1				SF:4-HC:2	-1.40413	-2.42459	-0.383678	0.0020596				SF:4-HC:2	-1.84394	-6.28404	2.59615	0.955268				SF:4-HC:2	-0.599996	-4.729	3.52901	1				SF:4-HC:2	16.1469	2.76602	29.5278	0.0074975				SF:4-HC:2	12.7795	-0.356786	25.9157	0.0631893				SF:4-HC:2	10.556
SC:2-HF:2	-0.937709	-1.82159	-0.0538259	0.0296561				SC:2-HF:2	-2.35737	-3.11797	-1.59677	0				SC:2-HF:2	-2.86265	-6.48797	0.76268	0.235098				SC:2-HF:2	-6.2066	-10.823	-1.59024	0.0020096				SC:2-HF:2	-39.8683	-53.2492	-26.4874	0				SC:2-HF:2	-42.3743	-55.5105	-29.238	0				SC:2-HF:2	-36.9251
SF:2-HF:2	-0.228152	-1.1964	0.740093	0.999882				SF:2-HF:2	-2.02927	-2.78987	-1.26867	1e-07				SF:2-HF:2	-2.11981	-5.74513	1.50552	0.667907				SF:2-HF:2	-4.41782	-9.03419	0.198543	0.0717246				SF:2-HF:2	-14.2635	-27.6444	-0.882542	0.0279501				SF:2-HF:2	-11.7678	-24.904	1.36843	0.118623				SF:2-HF:2	-4.37822
HC:3-HF:2	-0.937709	-1.82159	-0.0538259	0.0296561				HC:3-HF:2	-0.784753	-1.61795	0.0484438	0.0787921				HC:3-HF:2	1.86583	-2.18741	5.91906	0.90753				HC:3-HF:2	-1.43434	-6.0507	3.18203	0.997634				HC:3-HF:2	-38.8885	-52.2694	-25.5076	0				HC:3-HF:2	-42.3743	-55.5105	-29.238	0				HC:3-HF:2	-36.9251
HF:3-HF:2	-0.568032	-1.45191	0.315851	0.551211				HF:3-HF:2	-1.84955	-2.68274	-1.01635	1.9e-06				HF:3-HF:2	-0.529405	-4.58264	3.52383	1				HF:3-HF:2	-3.75111	-8.36748	0.865251	0.214264				HF:3-HF:2	-5.07742	-18.4583	8.30349	0.984273				HF:3-HF:2	-5.50781	-18.644	7.62843	0.965609				HF:3-HF:2	23.6704
SC:3-HF:2	-0.937709	-1.82159	-0.0538259	0.0296561				SC:3-HF:2	-2.35737	-3.11797	-1.59677	0				SC:3-HF:2	-2.86265	-6.48797	0.76268	0.235098				SC:3-HF:2	-6.2066	-10.823	-1.59024	0.0020096				SC:3-HF:2	-39.8683	-53.2492	-26.4874	0				SC:3-HF:2	-42.3743	-55.5105	-29.238	0				SC:3-HF:2	-36.9251
SF:3-HF:2	-0.917541	-1.88579	0.0507039	0.0769332				SF:3-HF:2	-2.1842	-3.0174	-1.35101	1e-07				SF:3-HF:2	-1.7955	-5.84874	2.25774	0.928622				SF:3-HF:2	-3.60664	-8.22301	1.00972	0.26369				SF:3-HF:2	-19.2495	-32.6304	-5.86855	0.000756				SF:3-HF:2	-17.1395	-30.2757	-4.00322	0.0027242				SF:3-HF:2	-9.4963
HC:4-HF:2	-0.937709	-1.82159	-0.0538259	0.0296561				HC:4-HF:2	-2.35737	-3.11797	-1.59677	0				HC:4-HF:2	0.413221	-3.64002	4.46646	1				HC:4-HF:2	0.372624	-4.68435	5.4296	1				HC:4-HF:2	-38.0045	-51.3854	-24.6236	0				HC:4-HF:2	-42.3743	-55.5105	-29.238	0				HC:4-HF:2	-36.9251
HF:4-HF:2	-0.182143	-1.15039	0.786102	0.999993				HF:4-HF:2	-1.10798	-1.94117	-0.274779	0.0030786				HF:4-HF:2	-1.20738	-5.26062	2.84585	0.997765				HF:4-HF:2	-1.07971	-5.69608	3.53665	0.999906				HF:4-HF:2	-6.21425	-21.1746	8.74607	0.966109				HF:4-HF:2	-19.0663	-32.2026	-5.93007	0.0006049				HF:4-HF:2	-8.8566
SC:4-HF:2	-0.937709	-1.82159	-0.0538259	0.0296561				SC:4-HF:2	-2.35737	-3.11797	-1.59677	0				SC:4-HF:2	-2.86265	-6.48797	0.76268	0.235098				SC:4-HF:2	-6.2066	-10.823	-1.59024	0.0020096				SC:4-HF:2	-39.8683	-53.2492	-26.4874	0				SC:4-HF:2	-42.3743	-55.5105	-29.238	0				SC:4-HF:2	-36.9251
SF:4-HF:2	-0.937709	-1.82159	-0.0538259	0.0296561				SF:4-HF:2	-2.31667	-3.33712	-1.29622	1.3e-06				SF:4-HF:2	-2.37991	-6.43314	1.67333	0.662153				SF:4-HF:2	-3.91511	-8.53147	0.701259	0.166919				SF:4-HF:2	-23.7214	-37.1023	-10.3404	2.59e-05				SF:4-HF:2	-29.5948	-42.731	-16.4586	2e-07				SF:4-HF:2	-26.3691
SF:2-SC:2	0.709556	-0.174326	1.59344	0.225048				SF:2-SC:2	0.328104	-0.352198	1.00841	0.871261				SF:2-SC:2	0.742837	-2.88249	4.36816	0.99997				SF:2-SC:2	1.78878	-2.34022	5.91778	0.951352				SF:2-SC:2	25.6048	12.2239	38.9858	6.4e-06				SF:2-SC:2	30.6064	17.4702	43.7427	1e-07				SF:2-SC:2	32.5469
HC:3-SC:2	-4.09395e-16	-0.790569	0.790569	1				HC:3-SC:2	1.57262	0.812016	2.33322	6.3e-06				HC:3-SC:2	4.72847	0.675236	8.78171	0.0123307				HC:3-SC:2	4.77226	0.643262	8.90127	0.0123415				HC:3-SC:2	0.979781	-12.4011	14.3607	1				HC:3-SC:2	-1.27861e-14	-13.1362	13.1362	1				HC:3-SC:2	2.80609e-14
HF:3-SC:2	0.369677	-0.420892	1.16025	0.910609				HF:3-SC:2	0.507823	-0.252778	1.26842	0.465018				HF:3-SC:2	2.33324	-1.72	6.38648	0.68913				HF:3-SC:2	2.45549	-1.67351	6.58449	0.675959				HF:3-SC:2	34.7909	21.41	48.1718	0				HF:3-SC:2	36.8664	23.7302	50.0027	0				HF:3-SC:2	60.5955
SC:3-SC:2	2.01228e-16	-0.790569	0.790569	1				SC:3-SC:2	8.67362e-17	-0.680303	0.680303	1				SC:3-SC:2	4.94396e-17	-3.62532	3.62532	1				SC:3-SC:2	-1.88738e-15	-4.129	4.129	1				SC:3-SC:2	4.44089e-16	-13.3809	13.3809	1				SC:3-SC:2	1.66534e-16	-13.1362	13.1362	1				SC:3-SC:2	1.41553e-15
SF:3-SC:2	0.0201675	-0.863715	0.90405	1				SF:3-SC:2	0.173167	-0.587434	0.933769	0.999879				SF:3-SC:2	1.06715	-2.98609	5.12038	0.999409				SF:3-SC:2	2.59996	-1.52904	6.72896	0.591683				SF:3-SC:2	20.6188	7.23792	33.9997	0.0002689				SF:3-SC:2	25.2348	12.0986	38.371	4.6e-06				SF:3-SC:2	27.4288
HC:4-SC:2	9.5988e-16	-0.790569	0.790569	1				HC:4-SC:2	-1.66534e-16	-0.680303	0.680303	1				HC:4-SC:2	3.27587	-0.777371	7.3291	0.208178				HC:4-SC:2	6.57923	1.96286	11.1956	0.0009058				HC:4-SC:2	1.86383	-11.5171	15.2447	1				HC:4-SC:2	3.16784e-14	-13.1362	13.1362	1				HC:4-SC:2	5.47062e-14
HF:4-SC:2	0.755566	-0.128317	1.63945	0.156637				HF:4-SC:2	1.2494	0.488794	2.01	0.0002057				HF:4-SC:2	1.65526	-2.39797	5.7085	0.960647				HF:4-SC:2	5.12689	0.997886	9.25589	0.0054633				HF:4-SC:2	33.654	18.6937	48.6144	2e-07				HF:4-SC:2	23.3079	10.1717	36.4442	2.09e-05				HF:4-SC:2	28.0685
SC:4-SC:2	6.245e-17	-0.790569	0.790569	1				SC:4-SC:2	3.88578e-16	-0.680303	0.680303	1				SC:4-SC:2	7.15573e-16	-3.62532	3.62532	1				SC:4-SC:2	-3.21965e-15	-4.129	4.129	1				SC:4-SC:2	3.9968e-15	-13.3809	13.3809	1				SC:4-SC:2	2.66453e-15	-13.1362	13.1362	1				SC:4-SC:2	-3.60823e-16
SF:4-SC:2	-1.59595e-16	-0.790569	0.790569	1				SF:4-SC:2	0.0407013	-0.921392	1.00279	1				SF:4-SC:2	0.482738	-3.5705	4.53597	1				SF:4-SC:2	2.2915	-1.83751	6.4205	0.765791				SF:4-SC:2	16.1469	2.76602	29.5278	0.0074975				SF:4-SC:2	12.7795	-0.356786	25.9157	0.0631893				SF:4-SC:2	10.556
HC:3-SF:2	-0.709556	-1.59344	0.174326	0.225048				HC:3-SF:2	1.24451	0.483912	2.00511	0.0002172				HC:3-SF:2	3.98563	-0.0676013	8.03887	0.0571617				HC:3-SF:2	2.98348	-1.14552	7.11249	0.375842				HC:3-SF:2	-24.6251	-38.006	-11.2441	1.32e-05				HC:3-SF:2	-30.6064	-43.7427	-17.4702	1e-07				HC:3-SF:2	-32.5469
HF:3-SF:2	-0.33988	-1.22376	0.544003	0.980051				HF:3-SF:2	0.179719	-0.580882	0.94032	0.999812				HF:3-SF:2	1.5904	-2.46283	5.64364	0.9713				HF:3-SF:2	0.666709	-3.46229	4.79571	0.999999				HF:3-SF:2	9.18604	-4.19488	22.5669	0.459374				HF:3-SF:2	6.26	-6.87624	19.3962	0.910631				HF:3-SF:2	28.0486
SC:3-SF:2	-0.709556	-1.59344	0.174326	0.225048				SC:3-SF:2	-0.328104	-1.00841	0.352198	0.871261				SC:3-SF:2	-0.742837	-4.36816	2.88249	0.99997				SC:3-SF:2	-1.78878	-5.91778	2.34022	0.951352				SC:3-SF:2	-25.6048	-38.9858	-12.2239	6.4e-06				SC:3-SF:2	-30.6064	-43.7427	-17.4702	1e-07				SC:3-SF:2	-32.5469
SF:3-SF:2	-0.689389	-1.65763	0.278856	0.391371				SF:3-SF:2	-0.154937	-0.915538	0.605664	0.999969				SF:3-SF:2	0.324308	-3.72893	4.37754	1				SF:3-SF:2	0.811178	-3.31782	4.94018	0.999989				SF:3-SF:2	-4.986	-18.3669	8.39491	0.98664				SF:3-SF:2	-5.37165	-18.5079	7.76459	0.971996				SF:3-SF:2	-5.11808
HC:4-SF:2	-0.709556	-1.59344	0.174326	0.225048				HC:4-SF:2	-0.328104	-1.00841	0.352198	0.871261				HC:4-SF:2	2.53303	-1.52021	6.58627	0.571779				HC:4-SF:2	4.79045	0.174081	9.40681	0.0360669				HC:4-SF:2	-23.741	-37.1219	-10.3601	2.55e-05				HC:4-SF:2	-30.6064	-43.7427	-17.4702	1e-07				HC:4-SF:2	-32.5469
HF:4-SF:2	0.0460095	-0.922236	1.01425	1				HF:4-SF:2	0.921291	0.160689	1.68189	0.0085868				HF:4-SF:2	0.912425	-3.14081	4.96566	0.999905				HF:4-SF:2	3.33811	-0.790894	7.46711	0.220343				HF:4-SF:2	8.0492	-6.91111	23.0095	0.804344				HF:4-SF:2	-7.2985	-20.4347	5.83774	0.775149				HF:4-SF:2	-4.47838
SC:4-SF:2	-0.709556	-1.59344	0.174326	0.225048				SC:4-SF:2	-0.328104	-1.00841	0.352198	0.871261				SC:4-SF:2	-0.742837	-4.36816	2.88249	0.99997				SC:4-SF:2	-1.78878	-5.91778	2.34022	0.951352				SC:4-SF:2	-25.6048	-38.9858	-12.2239	6.4e-06				SC:4-SF:2	-30.6064	-43.7427	-17.4702	1e-07				SC:4-SF:2	-32.5469
SF:4-SF:2	-0.709556	-1.59344	0.174326	0.225048				SF:4-SF:2	-0.287403	-1.2495	0.67469	0.997503				SF:4-SF:2	-0.260099	-4.31333	3.79314	1				SF:4-SF:2	0.502716	-3.62629	4.63172	1				SF:4-SF:2	-9.4579	-22.8388	3.92301	0.413206				SF:4-SF:2	-17.827	-30.9632	-4.69075	0.0015991				SF:4-SF:2	-21.9909
HF:3-HC:3	0.369677	-0.420892	1.16025	0.910609				HF:3-HC:3	-1.06479	-1.89799	-0.231597	0.0048281				HF:3-HC:3	-2.39523	-6.83533	2.04487	0.769769				HF:3-HC:3	-2.31678	-6.44578	1.81223	0.752581				HF:3-HC:3	33.8111	20.4302	47.192	0				HF:3-HC:3	36.8664	23.7302	50.0027	0				HF:3-HC:3	60.5955
SC:3-HC:3	6.10623e-16	-0.790569	0.790569	1				SC:3-HC:3	-1.57262	-2.33322	-0.812016	6.3e-06				SC:3-HC:3	-4.72847	-8.78171	-0.675235	0.0123307				SC:3-HC:3	-4.77226	-8.90127	-0.643262	0.0123415				SC:3-HC:3	-0.979781	-14.3607	12.4011	1				SC:3-HC:3	1.29526e-14	-13.1362	13.1362	1				SC:3-HC:3	-2.66453e-14
SF:3-HC:3	0.0201675	-0.863715	0.90405	1				SF:3-HC:3	-1.39945	-2.23265	-0.566253	0.0001502				SF:3-HC:3	-3.66133	-8.10142	0.778771	0.186453				SF:3-HC:3	-2.17231	-6.30131	1.9567	0.823903				SF:3-HC:3	19.6391	6.25814	33.02	0.0005637				SF:3-HC:3	25.2348	12.0986	38.371	4.6e-06				SF:3-HC:3	27.4288
HC:4-HC:3	1.36927e-15	-0.790569	0.790569	1				HC:4-HC:3	-1.57262	-2.33322	-0.812016	6.3e-06				HC:4-HC:3	-1.45261	-5.8927	2.98749	0.994291				HC:4-HC:3	1.80696	-2.8094	6.42333	0.978582				HC:4-HC:3	0.884046	-12.4969	14.265	1				HC:4-HC:3	4.44644e-14	-13.1362	13.1362	1				HC:4-HC:3	2.66453e-14
HF:4-HC:3	0.755566	-0.128317	1.63945	0.156637				HF:4-HC:3	-0.323223	-1.15642	0.509974	0.972295				HF:4-HC:3	-3.07321	-7.51331	1.36689	0.416288				HF:4-HC:3	0.354624	-3.77438	4.48363	1				HF:4-HC:3	32.6743	17.7139	47.6346	5e-07				HF:4-HC:3	23.3079	10.1717	36.4442	2.09e-05				HF:4-HC:3	28.0685
SC:4-HC:3	4.71845e-16	-0.790569	0.790569	1				SC:4-HC:3	-1.57262	-2.33322	-0.812016	6.3e-06				SC:4-HC:3	-4.72847	-8.78171	-0.675235	0.0123307				SC:4-HC:3	-4.77226	-8.90127	-0.643262	0.0123415				SC:4-HC:3	-0.979781	-14.3607	12.4011	1				SC:4-HC:3	1.54506e-14	-13.1362	13.1362	1				SC:4-HC:3	-2.84217e-14
SF:4-HC:3	2.498e-16	-0.790569	0.790569	1				SF:4-HC:3	-1.53192	-2.55237	-0.511463	0.0006938				SF:4-HC:3	-4.24573	-8.68583	0.194364	0.070817				SF:4-HC:3	-2.48077	-6.60977	1.64823	0.661422				SF:4-HC:3	15.1671	1.78624	28.5481	0.015026				SF:4-HC:3	12.7795	-0.356786	25.9157	0.0631893				SF:4-HC:3	10.556
SC:3-HF:3	-0.369677	-1.16025	0.420892	0.910609				SC:3-HF:3	-0.507823	-1.26842	0.252778	0.465018				SC:3-HF:3	-2.33324	-6.38648	1.72	0.68913				SC:3-HF:3	-2.45549	-6.58449	1.67351	0.675959				SC:3-HF:3	-34.7909	-48.1718	-21.41	0				SC:3-HF:3	-36.8664	-50.0027	-23.7302	0				SC:3-HF:3	-60.5955
SF:3-HF:3	-0.349509	-1.23339	0.534373	0.97473				SF:3-HF:3	-0.334656	-1.16785	0.498541	0.963501				SF:3-HF:3	-1.26609	-5.70619	3.174	0.998588				SF:3-HF:3	0.144469	-3.98453	4.27347	1				SF:3-HF:3	-14.172	-27.553	-0.791124	0.029722				SF:3-HF:3	-11.6317	-24.7679	1.50459	0.128564				SF:3-HF:3	-33.1667
HC:4-HF:3	-0.369677	-1.16025	0.420892	0.910609				HC:4-HF:3	-0.507823	-1.26842	0.252778	0.465018				HC:4-HF:3	0.942626	-3.49747	5.38272	0.999953				HC:4-HF:3	4.12374	-0.492628	8.7401	0.119143				HC:4-HF:3	-32.927	-46.308	-19.5461	0				HC:4-HF:3	-36.8664	-50.0027	-23.7302	0				HC:4-HF:3	-60.5955
HF:4-HF:3	0.385889	-0.497994	1.26977	0.944918				HF:4-HF:3	0.741572	-0.0916253	1.57477	0.116173				HF:4-HF:3	-0.677977	-5.11808	3.76212	0.999999				HF:4-HF:3	2.6714	-1.4576	6.8004	0.54962				HF:4-HF:3	-1.13683	-16.0971	13.8235	1				HF:4-HF:3	-13.5585	-26.6947	-0.422266	0.0376347				HF:4-HF:3	-32.527
SC:4-HF:3	-0.369677	-1.16025	0.420892	0.910609				SC:4-HF:3	-0.507823	-1.26842	0.252778	0.465018				SC:4-HF:3	-2.33324	-6.38648	1.72	0.68913				SC:4-HF:3	-2.45549	-6.58449	1.67351	0.675959				SC:4-HF:3	-34.7909	-48.1718	-21.41	0				SC:4-HF:3	-36.8664	-50.0027	-23.7302	0				SC:4-HF:3	-60.5955
SF:4-HF:3	-0.369677	-1.16025	0.420892	0.910609				SF:4-HF:3	-0.467122	-1.48758	0.553332	0.907099				SF:4-HF:3	-1.8505	-6.2906	2.5896	0.954056				SF:4-HF:3	-0.163993	-4.293	3.96501	1				SF:4-HF:3	-18.6439	-32.0249	-5.26302	0.0011913				SF:4-HF:3	-24.087	-37.2232	-10.9507	1.13e-05				SF:4-HF:3	-50.0395
SF:3-SC:3	0.0201675	-0.863715	0.90405	1				SF:3-SC:3	0.173167	-0.587434	0.933769	0.999879				SF:3-SC:3	1.06715	-2.98609	5.12038	0.999409				SF:3-SC:3	2.59996	-1.52904	6.72896	0.591683				SF:3-SC:3	20.6188	7.23792	33.9997	0.0002689				SF:3-SC:3	25.2348	12.0986	38.371	4.6e-06				SF:3-SC:3	27.4288
HC:4-SC:3	7.58652e-16	-0.790569	0.790569	1				HC:4-SC:3	-2.5327e-16	-0.680303	0.680303	1				HC:4-SC:3	3.27587	-0.777371	7.3291	0.208178				HC:4-SC:3	6.57923	1.96286	11.1956	0.0009058				HC:4-SC:3	1.86383	-11.5171	15.2447	1				HC:4-SC:3	3.15118e-14	-13.1362	13.1362	1				HC:4-SC:3	5.32907e-14
HF:4-SC:3	0.755566	-0.128317	1.63945	0.156637				HF:4-SC:3	1.2494	0.488794	2.01	0.0002057				HF:4-SC:3	1.65526	-2.39797	5.7085	0.960647				HF:4-SC:3	5.12689	0.997886	9.25589	0.0054633				HF:4-SC:3	33.654	18.6937	48.6144	2e-07				HF:4-SC:3	23.3079	10.1717	36.4442	2.09e-05				HF:4-SC:3	28.0685
SC:4-SC:3	-1.38778e-16	-0.790569	0.790569	1				SC:4-SC:3	3.01842e-16	-0.680303	0.680303	1				SC:4-SC:3	6.66134e-16	-3.62532	3.62532	1				SC:4-SC:3	-1.33227e-15	-4.129	4.129	1				SC:4-SC:3	3.55271e-15	-13.3809	13.3809	1				SC:4-SC:3	2.498e-15	-13.1362	13.1362	1				SC:4-SC:3	-1.77636e-15
SF:4-SC:3	-3.60823e-16	-0.790569	0.790569	1				SF:4-SC:3	0.0407013	-0.921392	1.00279	1				SF:4-SC:3	0.482738	-3.5705	4.53597	1				SF:4-SC:3	2.2915	-1.83751	6.4205	0.765791				SF:4-SC:3	16.1469	2.76602	29.5278	0.0074975				SF:4-SC:3	12.7795	-0.356786	25.9157	0.0631893				SF:4-SC:3	10.556
HC:4-SF:3	-0.0201675	-0.90405	0.863715	1				HC:4-SF:3	-0.173167	-0.933769	0.587434	0.999879				HC:4-SF:3	2.20872	-2.23138	6.64882	0.850907				HC:4-SF:3	3.97927	-0.637097	8.59563	0.150811				HC:4-SF:3	-18.755	-32.1359	-5.37409	0.0010962				HC:4-SF:3	-25.2348	-38.371	-12.0986	4.6e-06				HC:4-SF:3	-27.4288
HF:4-SF:3	0.735398	-0.232847	1.70364	0.296941				HF:4-SF:3	1.07623	0.243031	1.90942	0.0042865				HF:4-SF:3	0.588117	-3.85198	5.02821	1				HF:4-SF:3	2.52693	-1.60207	6.65593	0.63459				HF:4-SF:3	13.0352	-1.92511	27.9955	0.141601				HF:4-SF:3	-1.92685	-15.0631	11.2094	1				HF:4-SF:3	0.639702
SC:4-SF:3	-0.0201675	-0.90405	0.863715	1				SC:4-SF:3	-0.173167	-0.933769	0.587434	0.999879				SC:4-SF:3	-1.06715	-5.12038	2.98609	0.999409				SC:4-SF:3	-2.59996	-6.72896	1.52904	0.591683				SC:4-SF:3	-20.6188	-33.9997	-7.23792	0.0002689				SC:4-SF:3	-25.2348	-38.371	-12.0986	4.6e-06				SC:4-SF:3	-27.4288
SF:4-SF:3	-0.0201675	-0.90405	0.863715	1				SF:4-SF:3	-0.132466	-1.15292	0.887988	1				SF:4-SF:3	-0.584407	-5.02451	3.85569	1				SF:4-SF:3	-0.308462	-4.43746	3.82054	1				SF:4-SF:3	-4.4719	-17.8528	8.90901	0.995255				SF:4-SF:3	-12.4553	-25.5916	0.6809	0.0777636				SF:4-SF:3	-16.8728
HF:4-HC:4	0.755566	-0.128317	1.63945	0.156637				HF:4-HC:4	1.2494	0.488794	2.01	0.0002057				HF:4-HC:4	-1.6206	-6.0607	2.81949	0.984382				HF:4-HC:4	-1.45234	-6.0687	3.16403	0.997306				HF:4-HC:4	31.7902	16.8299	46.7505	8e-07				HF:4-HC:4	23.3079	10.1717	36.4442	2.09e-05				HF:4-HC:4	28.0685
SC:4-HC:4	-8.9743e-16	-0.790569	0.790569	1				SC:4-HC:4	5.55111e-16	-0.680303	0.680303	1				SC:4-HC:4	-3.27587	-7.3291	0.777371	0.208178				SC:4-HC:4	-6.57923	-11.1956	-1.96286	0.0009058				SC:4-HC:4	-1.86383	-15.2447	11.5171	1				SC:4-HC:4	-2.90138e-14	-13.1362	13.1362	1				SC:4-HC:4	-5.50671e-14
SF:4-HC:4	-1.11947e-15	-0.790569	0.790569	1				SF:4-HC:4	0.0407013	-0.921392	1.00279	1				SF:4-HC:4	-2.79313	-7.23323	1.64697	0.561878				SF:4-HC:4	-4.28773	-8.9041	0.328635	0.0901616				SF:4-HC:4	14.2831	0.902191	27.664	0.0275823				SF:4-HC:4	12.7795	-0.356786	25.9157	0.0631893				SF:4-HC:4	10.556
SC:4-HF:4	-0.755566	-1.63945	0.128317	0.156637				SC:4-HF:4	-1.2494	-2.01	-0.488794	0.0002057				SC:4-HF:4	-1.65526	-5.7085	2.39797	0.960647				SC:4-HF:4	-5.12689	-9.25589	-0.997886	0.0054633				SC:4-HF:4	-33.654	-48.6144	-18.6937	2e-07				SC:4-HF:4	-23.3079	-36.4442	-10.1717	2.09e-05				SC:4-HF:4	-28.0685
SF:4-HF:4	-0.755566	-1.63945	0.128317	0.156637				SF:4-HF:4	-1.20869	-2.22915	-0.18824	0.010804				SF:4-HF:4	-1.17252	-5.61262	3.26757	0.999389				SF:4-HF:4	-2.83539	-6.9644	1.29361	0.455277				SF:4-HF:4	-17.5071	-32.4674	-2.54679	0.0106274				SF:4-HF:4	-10.5285	-23.6647	2.60776	0.236124				SF:4-HF:4	-17.5125
SF:4-SC:4	-2.22045e-16	-0.790569	0.790569	1				SF:4-SC:4	0.0407013	-0.921392	1.00279	1				SF:4-SC:4	0.482738	-3.5705	4.53597	1				SF:4-SC:4	2.2915	-1.83751	6.4205	0.765791				SF:4-SC:4	16.1469	2.76602	29.5278	0.007497				SF:4-SC:4	12.7795	-0.356786	25.9157	0.0631893				SF:4-SC:4	10.556
[truncated: 12 more columns]

## Sheet: PLAxTime
Extracto ni dosis alteran el efecto del tiempo
	Df	Sum Sq	Mean Sq	F value	Pr(>F)
Extract:Time	3	5.9	1.97	0.063	0.972
Dose:Time	3	8.4	2.79	0.221	0.8769
			ANOVA	PostHoc	diff	lwr	upr	p adj
Basal	HC	Dosis 1	0.021	1h-0	2.10241	-5.32294	9.52776	0.819304
				2h-0	1.58079	-5.84456	9.00614	0.921944
				3h-0	5.90174	-1.52361	13.3271	0.119541
				4h-0	8.0275	1.24911	14.8059	0.0239932
				2h-1h	-0.521621	-7.94697	6.90373	0.998619
				3h-1h	3.79933	-3.62602	11.2247	0.397885
				4h-1h	5.92509	-0.8533	12.7035	0.0849124
				3h-2h	4.32095	-3.1044	11.7463	0.2991
				4h-2h	6.44671	-0.331679	13.2251	0.0612835
				4h-3h	2.12576	-4.65263	8.90415	0.764543
Basal	HC	Dosis 2	0.008	1h-0	5.92119e-16	-2.37749	2.37749	1
				2h-0	1.44483	-1.15958	4.04924	0.36005
				3h-0	2.32668	-0.277728	4.93109	0.0806546
				4h-0	2.89149	0.514	5.26898	0.0197082
				2h-1h	1.44483	-0.932658	3.82233	0.288973
				3h-1h	2.32668	-0.0508085	4.70417	0.0549864
				4h-1h	2.89149	0.764999	5.01798	0.0110149
				3h-2h	0.881849	-1.72256	3.48626	0.746394
				4h-2h	1.44666	-0.930833	3.82415	0.288032
				4h-3h	0.564809	-1.81268	2.9423	0.906281
Basal	HC	Dosis 3	0.002	1h-0	-5.92119e-16	-3.22136	3.22135	1
				2h-0	1.57262	-1.9562	5.10144	0.542884
				3h-0	4.72847	1.19965	8.25729	0.0119127
				4h-0	4.77226	1.55091	7.99362	0.0068914
				2h-1h	1.57262	-1.64874	4.79397	0.46643
				3h-1h	4.72847	1.50712	7.94983	0.007254
				4h-1h	4.77226	1.891	7.65353	0.0036494
				3h-2h	3.15585	-0.372964	6.68467	0.0803101
				4h-2h	3.19965	-0.0217079	6.421	0.051519
				4h-3h	0.0437931	-3.17756	3.26515	0.999998
Basal	HC	Dosis 4	<0,001	1h-0	1.62833e-15	-1.94565	1.94565	1
				2h-0	2.44249e-15	-1.94565	1.94565	1
				3h-0	3.27587	1.14452	5.40721	0.0056044
				4h-0	6.57923	4.44788	8.71058	7.31e-05
				2h-1h	8.14164e-16	-1.74024	1.74024	1
				3h-1h	3.27587	1.33022	5.22151	0.0033166
				4h-1h	6.57923	4.63358	8.52487	4e-05
				3h-2h	3.27587	1.33022	5.22151	0.0033166
				4h-2h	6.57923	4.63358	8.52487	4e-05
				4h-3h	3.30336	1.17201	5.43471	0.005345
Basal	HF	Dosis 1	0.062	1h-0	-3.70074e-17	-1.25678	1.25678	1
				2h-0	0.315467	-1.06127	1.6922	0.90184
				3h-0	-5.55111e-17	-1.37674	1.37674	1
				4h-0	1.18775	-0.188987	2.56449	0.0891585
				2h-1h	0.315467	-0.941316	1.57225	0.871106
				3h-1h	-1.85037e-17	-1.25678	1.25678	1
				4h-1h	1.18775	-0.0690328	2.44453	0.0628447
				3h-2h	-0.315467	-1.6922	1.06127	0.90184
				4h-2h	0.872283	-0.504454	2.24902	0.24041
				4h-3h	1.18775	-0.188987	2.56449	0.0891585
Basal	HF	Dosis 2	<0,001	1h-0	0.937709	-0.589036	2.46445	0.261118
				2h-0	2.35737	0.830627	3.88411	0.006684
				3h-0	2.86264	1.46892	4.25636	0.0014894
				4h-0	6.2066	4.67986	7.73335	3.02e-05
				2h-1h	1.41966	-0.107082	2.94641	0.0669991
				3h-1h	1.92494	0.531215	3.31866	0.0116271
				4h-1h	5.26889	3.74215	6.79564	8.03e-05
				3h-2h	0.505274	-0.888447	1.89899	0.670156
				4h-2h	3.84923	2.32249	5.37598	0.0004796
				4h-3h	3.34396	1.95024	4.73768	0.0006328
Basal	HF	Dosis 3	0.001	1h-0	0.369677	-1.15653	1.89588	0.900473
				2h-0	0.507823	-1.16405	2.1797	0.80833
				3h-0	2.33324	0.661366	4.00511	0.009572
				4h-0	2.45549	0.929283	3.98169	0.0043173
				2h-1h	0.138146	-1.38806	1.66435	0.997029
				3h-1h	1.96356	0.437357	3.48977	0.014761
				4h-1h	2.08581	0.720732	3.45089	0.0057938
				3h-2h	1.82542	0.153542	3.49729	0.0334208
				4h-2h	1.94767	0.42146	3.47387	0.0153991
				4h-3h	0.122249	-1.40396	1.64845	0.998148
Basal	HF	Dosis 4	0.069	1h-0	0.755566	-5.41963	6.93076	0.988564
				2h-0	1.2494	-4.9258	7.42459	0.933687
				3h-0	1.65526	-4.51993	7.83045	0.844523
				4h-0	5.12689	-0.510264	10.764	0.0730319
				2h-1h	0.493829	-5.68136	6.66902	0.997717
				3h-1h	0.899696	-5.2755	7.07489	0.978425
				4h-1h	4.37132	-1.26583	10.0085	0.130028
				3h-2h	0.405867	-5.76932	6.58106	0.998935
				4h-2h	3.87749	-1.75966	9.51465	0.190297
				4h-3h	3.47163	-2.16553	9.10878	0.259286
Basal	SC	Dosis 1	NA (Todo 0)	NA
Basal	SC	Dosis 2	NA (Todo 0)	NA
Basal	SC	Dosis 3	NA (Todo 0)	NA
Basal	SC	Dosis 4	NA (Todo 0)	NA
Basal	SF	Dosis 1	0.042	1h-0	1.2159	-0.125971	2.55777	0.0793423
				2h-0	-3.60823e-16	-1.34187	1.34187	1
				3h-0	0.176699	-1.16517	1.51857	0.990647
				4h-0	0.497453	-0.844418	1.83932	0.727062
				2h-1h	-1.2159	-2.41611	-0.0156939	0.0468857
				3h-1h	-1.0392	-2.23941	0.161005	0.0966316
				4h-1h	-0.718446	-1.91865	0.481759	0.332339
				3h-2h	0.176699	-1.02351	1.3769	0.985838
				4h-2h	0.497453	-0.702753	1.69766	0.646025
				4h-3h	0.320754	-0.879451	1.52096	0.890439
Basal	SF	Dosis 2	0.278	1h-0	0.709556	-2.36633	3.78544	0.924418
				2h-0	0.328104	-2.47978	3.13599	0.993275
				3h-0	0.742837	-2.06505	3.55072	0.883885
				4h-0	1.78878	-1.0191	4.59666	0.269611
				2h-1h	-0.381452	-3.18934	2.42643	0.988175
				3h-1h	0.0332805	-2.7746	2.84117	0.999999
				4h-1h	1.07922	-1.72866	3.88711	0.683722
				3h-2h	0.414733	-2.09672	2.92618	0.975904
				4h-2h	1.46068	-1.05077	3.97212	0.34117
				4h-3h	1.04594	-1.46551	3.55739	0.622891
Basal	SF	Dosis 3	0.309	1h-0	0.0201675	-5.46327	5.5036	1
				2h-0	0.173167	-5.31027	5.6566	0.999941
				3h-0	1.06715	-4.41629	6.55058	0.941582
				4h-0	2.59996	-2.40571	7.60562	0.385916
				2h-1h	0.153	-5.33043	5.63643	0.999964
				3h-1h	1.04698	-4.43645	6.53041	0.945144
				4h-1h	2.57979	-2.42588	7.58546	0.392119
				3h-2h	0.893978	-4.58946	6.37741	0.967924
				4h-2h	2.42679	-2.57888	7.43246	0.441495
				4h-3h	1.53281	-3.47285	6.53848	0.778226
Basal	SF	Dosis 4	0.291	1h-0	7.03141e-16	-4.41109	4.41109	1
				2h-0	0.0407013	-5.8774	5.9588	1
				3h-0	0.482738	-4.34937	5.31485	0.994647
				4h-0	2.2915	-2.11959	6.70259	0.385791
				2h-1h	0.0407013	-5.53894	5.62034	1
				3h-1h	0.482738	-3.92835	4.89383	0.992451
				4h-1h	2.2915	-1.6539	6.2369	0.300496
				3h-2h	0.442037	-5.47606	6.36014	0.998247
				4h-2h	2.2508	-3.32884	7.83043	0.590107
				4h-3h	1.80876	-2.60233	6.21985	0.577257
Apical	HC	Dosis 1	NA (solo 2 valores, no es válido)
Apical	HC	Dosis 2	NA (solo 2 valores, no es válido)
Apical	HC	Dosis 3	NA (solo 2 valores, no es válido)
Apical	HC	Dosis 4	NA (solo 2 valores, no es válido)
Apical	HF	Dosis 1	0.012	1h-0	-22.5377	-47.443	2.36771	0.0783078
				2h-0	-20.7053	-43.4407	2.03008	0.0761972
				3h-0	-33.0415	-55.7769	-10.3061	0.0066242
				4h-0	-24.63	-47.3654	-1.89464	0.0338845
				2h-1h	1.83235	-20.903	24.5677	0.998387
				3h-1h	-10.5039	-33.2392	12.2315	0.537594
				4h-1h	-2.09237	-24.8278	20.643	0.997301
				3h-2h	-12.3362	-32.6713	7.99894	0.307231
				4h-2h	-3.92472	-24.2599	16.4104	0.958339
				4h-3h	8.41149	-11.9237	28.7466	0.628254
Apical	HF	Dosis 2	0.088	1h-0	-16.5895	-37.0554	3.8763	0.126346
				2h-0	-14.0836	-34.5494	6.38226	0.224591
				3h-0	-19.5327	-39.9985	0.933127	0.0625784
				4h-0	-15.2226	-35.6885	5.2432	0.173645
				2h-1h	2.50596	-15.7992	20.8112	0.989185
				3h-1h	-2.94318	-21.2484	15.362	0.980451
				4h-1h	1.3669	-16.9383	19.6721	0.998945
				3h-2h	-5.44913	-23.7543	12.8561	0.848697
				4h-2h	-1.13905	-19.4443	17.1661	0.999485
				4h-3h	4.31008	-13.9951	22.6153	0.926701
Apical	HF	Dosis 3	0.014	1h-0	-15.307	-38.6877	8.07377	0.260973
				2h-0	-13.2314	-36.6121	10.1493	0.380024
				3h-0	10.4977	-12.8831	33.8784	0.581335
				4h-0	-0.28315	-23.6639	23.0976	0.999999
				2h-1h	2.07557	-18.8368	22.9879	0.99681
				3h-1h	25.8047	4.89228	46.717	0.0160593
				4h-1h	15.0238	-5.88855	35.9362	0.195472
				3h-2h	23.7291	2.81671	44.6414	0.0258728
				4h-2h	12.9482	-7.96412	33.8606	0.304631
				4h-3h	-10.7808	-31.6932	10.1315	0.461701
Apical	HF	Dosis 4	0.426	1h-0	7.43295	-12.8731	27.739	0.717919
				2h-0	-2.91315	-21.45	15.6237	0.979837
				3h-0	1.84743	-16.6894	20.3843	0.996332
				4h-0	3.87409	-14.6627	22.4109	0.945402
				2h-1h	-10.3461	-28.8829	8.19073	0.37541
				3h-1h	-5.58552	-24.1224	12.9513	0.830202
				4h-1h	-3.55887	-22.0957	14.978	0.959086
				3h-2h	4.76058	-11.8193	21.3404	0.852003
				4h-2h	6.78723	-9.79261	23.3671	0.636371
				4h-3h	2.02665	-14.5532	18.6065	0.992029
Apical	SC	Dosis 1	NA (solo 2 valores, no es válido)
Apical	SC	Dosis 2	NA (solo 2 valores, no es válido)
Apical	SC	Dosis 3	NA (solo 2 valores, no es válido)
Apical	SC	Dosis 4	NA (solo 2 valores, no es válido)
Apical	SF	Dosis 1	<0.001	1h-0	-37.9276	-56.1865	-19.6687	0.0004611
				2h-0	-38.7397	-56.9986	-20.4809	0.0003923
				3h-0	-25.7557	-44.0146	-7.49683	0.00706
				4h-0	-28.8013	-47.0602	-10.5425	0.0033719
				2h-1h	-0.812129	-17.1434	15.5191	0.999788
				3h-1h	12.1719	-4.15934	28.5031	0.172421
				4h-1h	9.12627	-7.20495	25.4575	0.390933
				3h-2h	12.984	-3.34721	29.3152	0.136154
				4h-2h	9.9384	-6.39283	26.2696	0.318711
				4h-3h	-3.04562	-19.3768	13.2856	0.966782
Apical	SF	Dosis 2	<0,001	1h-0	-26.4592	-38.3078	-14.6105	0.0002644
				2h-0	-21.4576	-33.3062	-9.60889	0.0012771
				3h-0	-19.5171	-31.3658	-7.66843	0.002503
				4h-0	-14.016	-25.8647	-2.16737	0.0204971
				2h-1h	5.0016	-5.59618	15.5994	0.538947
				3h-1h	6.94206	-3.65572	17.5398	0.260551
				4h-1h	12.4431	1.84534	23.0409	0.0213832
				3h-2h	1.94046	-8.65732	12.5382	0.96886
				4h-2h	7.44151	-3.15626	18.0393	0.210664
				4h-3h	5.50106	-5.09672	16.0988	0.455646
Apical	SF	Dosis 3	0.009	1h-0	-12.4973	-23.62	-1.37472	0.0273042
				2h-0	-7.88138	-19.004	3.24124	0.204546
				3h-0	-5.68736	-16.81	5.43526	0.468897
				4h-0	0.768305	-10.3543	11.8909	0.999223
				2h-1h	4.61596	-5.33241	14.5643	0.553538
				3h-1h	6.80998	-3.13839	16.7584	0.228308
				4h-1h	13.2656	3.31727	23.214	0.0100608
				3h-2h	2.19402	-7.75435	12.1424	0.940943
				4h-2h	8.64968	-1.29869	18.5981	0.0949458
				4h-3h	6.45566	-3.49271	16.404	0.267703
Apical	SF	Dosis 4	0.067	1h-0	1.29976	-7.98888	10.5884	0.988267
				2h-0	-2.06772	-11.3564	7.22092	0.939078
				3h-0	-4.29115	-13.5798	4.99749	0.557248
				4h-0	3.90228	-5.38636	13.1909	0.635435
				2h-1h	-3.36748	-11.6755	4.94053	0.663163
				3h-1h	-5.59091	-13.8989	2.7171	0.240551
				4h-1h	2.60252	-5.7055	10.9105	0.824986
				3h-2h	-2.22343	-10.5314	6.08458	0.889964
				4h-2h	5.97	-2.33802	14.278	0.195322
				4h-3h	8.19343	-0.114582	16.5014	0.053511

## Sheet: LACxExtract
			ANOVA	PostHoc	diff	lwr	upr	p adj
Basal	Dosis 1	Tiempo 1h	0.031	HF-HC	3.27407	-48.9197	55.4678	0.99689
				SC-HC	-52.4648	-104.658	-0.271026	0.048844
				SF-HC	-20.7574	-72.9512	31.4363	0.602447
				SC-HF	-55.7388	-107.933	-3.5451	0.0368639
				SF-HF	-24.0315	-76.2252	28.1622	0.493316
				SF-SC	31.7073	-20.4864	83.901	0.283233
Basal	Dosis 1	Tiempo 2h	0.324	HF-HC	149.943	-240.251	540.137	0.626485
				SC-HC	-87.2076	-477.401	302.986	0.888154
				SF-HC	-22.8339	-413.027	367.36	0.997468
				SC-HF	-237.151	-627.344	153.043	0.282905
				SF-HF	-172.777	-562.971	217.417	0.523212
				SF-SC	64.3737	-325.82	454.567	0.949766
Basal	Dosis 1	Tiempo 3h	0.321	HF-HC	-352.086	-1148.86	444.692	0.524778
				SC-HC	-461.36	-1258.14	335.418	0.3177
				SF-HC	-390.144	-1186.92	406.635	0.445622
				SC-HF	-109.275	-906.053	687.503	0.969898
				SF-HF	-38.0581	-834.836	758.72	0.998615
				SF-SC	71.2168	-725.561	867.995	0.991192
Basal	Dosis 1	Tiempo 4h	0.025	HF-HC	-232.415	-617.303	152.474	0.287474
				SC-HC	-438.917	-823.805	-54.0284	0.0267284
				SF-HC	-392.339	-777.227	-7.45072	0.0458278
				SC-HF	-206.502	-591.39	178.386	0.374907
				SF-HF	-159.924	-544.813	224.964	0.570789
				SF-SC	46.5777	-338.31	431.466	0.978876
Basal	Dosis 2	Tiempo 1h	<0,001	HF-HC	62.0039	39.6641	84.3437	9.42e-05
				SC-HC	-5.6448	-27.9846	16.695	0.848526
				SF-HC	10.6936	-11.6462	33.0334	0.463234
				SC-HF	-67.6487	-89.9885	-45.3089	4.97e-05
				SF-HF	-51.3103	-73.6501	-28.9705	0.0003644
				SF-SC	16.3384	-6.0014	38.6782	0.167198
Basal	Dosis 2	Tiempo 2h	0.029	HF-HC	62.0039	39.6641	84.3437	9.42e-05
				SC-HC	-5.6448	-27.9846	16.695	0.848526
				SF-HC	10.6936	-11.6462	33.0334	0.463234
				SC-HF	-67.6487	-89.9885	-45.3089	4.97e-05
				SF-HF	-51.3103	-73.6501	-28.9705	0.0003644
				SF-SC	16.3384	-6.0014	38.6782	0.167198
Basal	Dosis 2	Tiempo 3h	0.009	HF-HC	19.8863	-82.1844	121.957	0.921523
				SC-HC	-115.913	-217.984	-13.8423	0.0272952
				SF-HC	-74.309	-176.38	27.7617	0.169668
				SC-HF	-135.799	-237.87	-33.7286	0.0117883
				SF-HF	-94.1954	-196.266	7.87536	0.0708532
				SF-SC	41.6039	-60.4668	143.675	0.584805
Basal	Dosis 2	Tiempo 4h	<0,001	HF-HC	116.176	19.0737	213.279	0.0209104
				SC-HC	-103.087	-200.19	-5.98395	0.0379159
				SF-HC	-100.99	-198.093	-3.88741	0.0417644
				SC-HF	-219.263	-316.366	-122.16	0.0004103
				SF-HF	-217.167	-314.27	-120.064	0.0004387
				SF-SC	2.09654	-95.0063	99.1994	0.999871
Basal	Dosis 3	Tiempo 1h	0.083	HF-HC	21.0281	-26.5964	68.6526	0.525374
				SC-HC	-24.3674	-71.9919	23.2571	0.411475
				SF-HC	5.82341	-41.8011	53.4479	0.978242
				SC-HF	-45.3955	-93.02	2.22904	0.0617636
				SF-HF	-15.2047	-62.8292	32.4198	0.741859
				SF-SC	30.1908	-17.4337	77.8153	0.253946
Basal	Dosis 3	Tiempo 2h	0.261	HF-HC	-9.12932	-100.925	82.666	0.987985
				SC-HC	-42.8647	-134.66	48.9307	0.482445
				SF-HC	-53.378	-145.173	38.4174	0.314604
				SC-HF	-33.7354	-125.531	58.06	0.656591
				SF-HF	-44.2487	-136.044	47.5467	0.457806
				SF-SC	-10.5133	-102.309	81.282	0.981953
Basal	Dosis 3	Tiempo 3h	0.123	HF-HC	38.2933	-50.44	127.027	0.542646
				SC-HC	-39.2792	-128.012	49.4541	0.52344
				SF-HC	-0.852864	-89.5862	87.8804	0.999989
				SC-HF	-77.5724	-166.306	11.1609	0.0882835
				SF-HF	-39.1461	-127.879	49.5872	0.526016
				SF-SC	38.4263	-50.307	127.16	0.54004
Basal	Dosis 3	Tiempo 4h	0.367	HF-HC	-68.2951	-278.038	141.448	0.730864
				SC-HC	-119.764	-329.507	89.9796	0.327985
				SF-HC	-90.2201	-299.964	119.523	0.5451
				SC-HF	-51.4687	-261.212	158.275	0.858916
				SF-HF	-21.925	-231.668	187.818	0.986123
				SF-SC	29.5437	-180.2	239.287	0.967558
Basal	Dosis 4	Tiempo 1h	0.135	HF-HC	29.9534	-37.1979	97.1048	0.517628
				SC-HC	-26.7772	-93.9286	40.3742	0.600555
				SF-HC	6.81192	-60.3395	73.9633	0.987276
				SC-HF	-56.7306	-123.882	10.4207	0.100813
				SF-HF	-23.1415	-90.2929	44.0099	0.697462
				SF-SC	33.5891	-33.5622	100.741	0.429051
Basal	Dosis 4	Tiempo 2h	0.113	HF-HC	26.712	-57.8738	111.298	0.747813
				SC-HC	-45.3246	-129.91	39.2611	0.37588
				SF-HC	-23.2378	-107.824	61.3479	0.815341
				SC-HF	-72.0366	-156.622	12.5491	0.0977591
				SF-HF	-49.9498	-134.535	34.636	0.303415
				SF-SC	22.0869	-62.4989	106.673	0.836123
Basal	Dosis 4	Tiempo 3h	0.005	HF-HC	-11.7198	-74.1419	50.7024	0.928837
				SC-HC	-88.0692	-150.491	-25.6471	0.0084443
				SF-HC	-66.6456	-129.068	-4.22341	0.0369072
				SC-HF	-76.3494	-138.772	-13.9273	0.018625
				SF-HF	-54.9258	-117.348	7.49637	0.0860427
				SF-SC	21.4237	-40.9985	83.8458	0.699963
Basal	Dosis 4	Tiempo 4h	0.532	HF-HC	35.4769	-201.944	272.897	0.961751
				SC-HC	-58.8194	-296.24	178.601	0.855594
				SF-HC	43.6642	-193.756	281.085	0.932645
				SC-HF	-94.2963	-331.717	143.124	0.603393
				SF-HF	8.18733	-229.233	245.608	0.999476
				SF-SC	102.484	-134.937	339.904	0.542472
Apical	Dosis 1	Tiempo 1h	<0,001	HF-HC	315.657	114.158	517.156	0.0045318
				SC-HC	69.3977	-132.101	270.897	0.697833
				SF-HC	476.451	274.952	677.949	0.0002971
				SC-HF	-246.259	-447.758	-44.7604	0.0187038
				SF-HF	160.794	-40.7052	362.292	0.124417
				SF-SC	407.053	205.554	608.552	0.0008806
Apical	Dosis 1	Tiempo 2h	<0,001	HF-HC	381.847	138.372	625.321	0.0045005
				SC-HC	128.182	-115.293	371.656	0.389427
				SF-HC	488.99	245.516	732.465	0.0009159
				SC-HF	-253.665	-497.14	-10.1905	0.0414249
				SF-HF	107.144	-136.331	350.619	0.527918
				SF-SC	360.809	117.334	604.284	0.0063317
Apical	Dosis 1	Tiempo 3h	0.011	HF-HC	168.779	-240.81	578.367	0.576874
				SC-HC	-29.8156	-439.404	379.773	0.995175
				SF-HC	509.388	99.7999	918.976	0.0170462
				SC-HF	-198.594	-608.183	210.994	0.453262
				SF-HF	340.609	-68.9788	750.198	0.107002
				SF-SC	539.204	129.616	948.792	0.0125029
Apical	Dosis 1	Tiempo 4h	0.296	HF-HC	76.6687	-662.974	816.312	0.986456
				SC-HC	-310.105	-1049.75	429.538	0.564168
				SF-HC	131.927	-607.716	871.57	0.937946
				SC-HF	-386.773	-1126.42	352.87	0.394639
				SF-HF	55.2587	-684.384	794.902	0.994791
				SF-SC	442.032	-297.611	1181.67	0.294831
Apical	Dosis 2	Tiempo 1h	<0,001	HF-HC	149.379	3.55978	295.199	0.0447984
				SC-HC	55.7559	-90.0635	201.575	0.629923
				SF-HC	427.829	282.01	573.648	6.27e-05
				SC-HF	-93.6232	-239.443	52.1961	0.245474
				SF-HF	278.45	132.631	424.269	0.0012829
				SF-SC	372.073	226.254	517.893	0.0001729
Apical	Dosis 2	Tiempo 2h	<0,001	HF-HC	297.494	211.157	383.831	1.9e-05
				SC-HC	84.6003	-1.73695	170.938	0.0547487
				SF-HC	364.734	278.397	451.072	4.1e-06
				SC-HF	-212.893	-299.231	-126.556	0.0002208
				SF-HF	67.2406	-19.0966	153.578	0.135536
				SF-SC	280.134	193.797	366.471	2.97e-05
Apical	Dosis 2	Tiempo 3h	<0,001	HF-HC	213.591	85.0696	342.112	0.0031435
				SC-HC	18.7175	-109.804	147.239	0.964388
				SF-HC	291.155	162.634	419.676	0.0004011
				SC-HF	-194.873	-323.395	-66.3521	0.0055216
				SF-HF	77.5642	-50.957	206.085	0.287869
				SF-SC	272.438	143.916	400.959	0.0006348
Apical	Dosis 2	Tiempo 4h	0.003	HF-HC	130.714	-58.1419	319.57	0.198337
				SC-HC	31.1161	-157.74	219.972	0.949947
				SF-HC	307.601	118.745	496.457	0.003565
				SC-HF	-99.5978	-288.454	89.258	0.388103
				SF-HF	176.887	-11.9686	365.743	0.06657
				SF-SC	276.485	87.6292	465.341	0.0068043
Apical	Dosis 3	Tiempo 1h	0.001	HF-HC	102.052	-13.4295	217.533	0.0845771
				SC-HC	12.2516	-103.23	127.733	0.985517
				SF-HC	208.812	93.331	324.293	0.0018346
				SC-HF	-89.8	-205.281	25.6811	0.136261
				SF-HF	106.76	-8.72069	222.242	0.0703294
				SF-SC	196.561	81.0794	312.042	0.0027039
Apical	Dosis 3	Tiempo 2h	0.015	HF-HC	145.099	-30.4016	320.6	0.109346
				SC-HC	85.9802	-89.5204	261.481	0.445205
				SF-HC	234.488	58.9874	409.989	0.0115114
				SC-HF	-59.1189	-234.62	116.382	0.711178
				SF-HF	89.389	-86.1116	264.89	0.414997
				SF-SC	148.508	-26.9928	324.009	0.100189
Apical	Dosis 3	Tiempo 3h	0.003	HF-HC	148.636	52.3542	244.918	0.0049543
				SC-HC	45.8483	-50.4337	142.13	0.467284
				SF-HC	140.294	44.0121	236.576	0.0069959
				SC-HF	-102.788	-199.07	-6.50591	0.0369216
				SF-HF	-8.34215	-104.624	87.9398	0.991957
				SF-SC	94.4457	-1.83624	190.728	0.0544906
Apical	Dosis 3	Tiempo 4h	<0,001	HF-HC	75.8914	-31.0187	182.801	0.18367
				SC-HC	11.3874	-95.5227	118.297	0.98535
				SF-HC	215.891	108.981	322.801	0.0008828
				SC-HF	-64.504	-171.414	42.4061	0.288062
				SF-HF	140	33.0896	246.91	0.0128747
				SF-SC	204.504	97.5935	311.414	0.0012683
Apical	Dosis 4	Tiempo 1h	0.243	HF-HC	335.203	-172.626	843.031	0.227511
				SC-HC	66.4101	-441.419	574.239	0.973675
				SF-HC	91.6311	-416.198	599.46	0.935994
				SC-HF	-268.793	-776.621	239.036	0.385304
				SF-HF	-243.572	-751.4	264.257	0.461688
				SF-SC	25.221	-482.608	533.05	0.998445
Apical	Dosis 4	Tiempo 2h	0.003	HF-HC	130.301	55.5542	205.048	0.0023225
				SC-HC	75.1737	0.42694	149.921	0.04873
				SF-HC	101.61	26.8633	176.357	0.0104447
				SC-HF	-55.1272	-129.874	19.6196	0.162732
				SF-HF	-28.6909	-103.438	46.0559	0.62727
				SF-SC	26.4363	-48.3105	101.183	0.681339
Apical	Dosis 4	Tiempo 3h	0.012	HF-HC	110.614	26.2033	195.024	0.0128248
				SC-HC	13.445	-70.9653	97.8552	0.954375
				SF-HC	24.1945	-60.2158	108.605	0.796441
				SC-HF	-97.1686	-181.579	-12.7583	0.0254906
				SF-HF	-86.4191	-170.829	-2.00882	0.0449221
				SF-SC	10.7495	-73.6608	95.1598	0.97558
Apical	Dosis 4	Tiempo 4h	0.006	HF-HC	433.814	129.024	738.604	0.0080249
				SC-HC	20.0012	-284.789	324.791	0.996447
				SF-HC	169.288	-135.502	474.078	0.34863
				SC-HF	-413.813	-718.603	-109.022	0.0105186
				SF-HF	-264.526	-569.316	40.2643	0.0908429
				SF-SC	149.287	-155.503	454.077	0.445383

[truncated: 3 more sheets: LACxDose, LACxTime, LAC2way_Extract_Dose]
